# Supplementary material for: Exploration of trends in the incidence and prevalence of childhood maltreatment and domestic abuse recording in UK primary care: a retrospective cohort study using ‘the health improvement network’ database
Source: PubMed Central journal article supplement — BMJ Open. 2020 Jun 4;10(6):e036949. doi: 10.1136/bmjopen-2020-036949 (PMC7279643; doi:10.1136/bmjopen-2020-036949), 2020-06-04
Supplement: bmjopen-2020-036949.draft_revisions.pdf [file bmjopen-2020-036949.draft_revisions.pdf]

# BMJ Open

BMJ Open is committed to open peer review. As part of this commitment we make the peer review history of every article we publish publicly available.

When an article is published we post the peer reviewers' comments and the authors' responses online. We also post the versions of the paper that were used during peer review. These are the versions that the peer review comments apply to.

The versions of the paper that follow are the versions that were submitted during the peer review process. They are not the versions of record or the final published versions. They should not be cited or distributed as the published version of this manuscript.

BMJ Open is an open access journal and the full, final, typeset and author-corrected version of record of the manuscript is available on our site with no access controls, subscription charges or pay-per-view fees (<http://bmjopen.bmj.com>).

If you have any questions on BMJ Open's open peer review process please email [info.bmjopen@bmj.com](mailto:info.bmjopen@bmj.com)

# BMJ Open

## Epidemiological trends of childhood maltreatment and domestic abuse recorded in 'The Health Improvement Network' database

|                               |                                                                                                                                                                                                                                                                                                                                                                                                                                                                                                                                                                                                                                                                                                    |
|-------------------------------|----------------------------------------------------------------------------------------------------------------------------------------------------------------------------------------------------------------------------------------------------------------------------------------------------------------------------------------------------------------------------------------------------------------------------------------------------------------------------------------------------------------------------------------------------------------------------------------------------------------------------------------------------------------------------------------------------|
| Journal:                      | <i>BMJ Open</i>                                                                                                                                                                                                                                                                                                                                                                                                                                                                                                                                                                                                                                                                                    |
| Manuscript ID                 | bmjopen-2020-036949                                                                                                                                                                                                                                                                                                                                                                                                                                                                                                                                                                                                                                                                                |
| Article Type:                 | Original research                                                                                                                                                                                                                                                                                                                                                                                                                                                                                                                                                                                                                                                                                  |
| Date Submitted by the Author: | 13-Jan-2020                                                                                                                                                                                                                                                                                                                                                                                                                                                                                                                                                                                                                                                                                        |
| Complete List of Authors:     | Chandan, Joht; University of Birmingham College of Medical and Dental Sciences, ; University of Warwick Warwick Medical School, Gokhale, Krishna; University of Birmingham, Institute of Applied Health Research<br>Bradbury-Jones, C; University of Birmingham College of Medical and Dental Sciences<br>Nirantharakumar, Krishnarajah; University of Birmingham College of Medical and Dental Sciences, Institute of Applied Health Research<br>Bandyopadhyay, Siddhartha; University of Birmingham, The Department of Economics<br>Taylor, Julie; University of Birmingham, School of Nursing, College of Medical and Dental Sciences, ; Birmingham Women's and Children's NHS Foundation Trust |
| Keywords:                     | EPIDEMIOLOGY, Child protection < PAEDIATRICS, PRIMARY CARE                                                                                                                                                                                                                                                                                                                                                                                                                                                                                                                                                                                                                                         |
|                               |                                                                                                                                                                                                                                                                                                                                                                                                                                                                                                                                                                                                                                                                                                    |

SCHOLARONE™  
Manuscripts

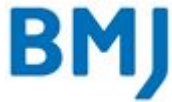

I, the Submitting Author has the right to grant and does grant on behalf of all authors of the Work (as defined in the below author licence), an exclusive licence and/or a non-exclusive licence for contributions from authors who are: i) UK Crown employees; ii) where BMJ has agreed a CC-BY licence shall apply, and/or iii) in accordance with the terms applicable for US Federal Government officers or employees acting as part of their official duties; on a worldwide, perpetual, irrevocable, royalty-free basis to BMJ Publishing Group Ltd ("BMJ") its licensees and where the relevant Journal is co-owned by BMJ to the co-owners of the Journal, to publish the Work in this journal and any other BMJ products and to exploit all rights, as set out in our [licence](#).

The Submitting Author accepts and understands that any supply made under these terms is made by BMJ to the Submitting Author unless you are acting as an employee on behalf of your employer or a postgraduate student of an affiliated institution which is paying any applicable article publishing charge ("APC") for Open Access articles. Where the Submitting Author wishes to make the Work available on an Open Access basis (and intends to pay the relevant APC), the terms of reuse of such Open Access shall be governed by a Creative Commons licence – details of these licences and which [Creative Commons](#) licence will apply to this Work are set out in our licence referred to above.

Other than as permitted in any relevant BMJ Author's Self Archiving Policies, I confirm this Work has not been accepted for publication elsewhere, is not being considered for publication elsewhere and does not duplicate material already published. I confirm all authors consent to publication of this Work and authorise the granting of this licence.

# Epidemiological trends of childhood maltreatment and domestic abuse recorded in 'The Health Improvement Network' database

## Author Names:

Joht Singh Chandan, Krishna Gokhale, Caroline-Bradbury Jones, Krishnarajah Nirantharakumar\*, Siddhartha Bandyopadhyay\*, Julie Taylor\*

\*Equal Contribution

## Authors Addresses and Positions:

### Corresponding author:

Dr Joht Singh Chandan MFPH  
Academic Clinical Fellow in Public Health  
Institute of Applied Health Research, College of Medical and Dental Sciences, University of Birmingham, B152TT

### Co-authors:

Mr Krishna Margadhamane Gokhale MSc  
Research Fellow  
Institute of Applied Health Research, College of Medical and Dental Sciences, University of Birmingham, B152TT

Dr Caroline Bradbury-Jones  
Reader in Nursing  
School of Nursing, College of Medical and Dental Sciences, University of Birmingham, B152TT

Dr Krishnarajah Nirantharakumar MD  
Senior Clinical Lecturer & UKRI Innovation Clinical Fellow  
Midlands Health Data Research UK & Institute of Applied Health Research, College of Medical and Dental Sciences, University of Birmingham, B152TT

Professor Siddhartha Bandyopadhyay PhD (Full Professor)  
Professor of Economics and Director of the Centre of Crime, Justice and Policing  
The Department of Economics, University of Birmingham, B152TT

Professor Julie Taylor PhD (Full Professor)  
Professor of Child Protection  
School of Nursing, College of Medical and Dental Sciences, University of Birmingham, B152TT  
Birmingham Women's and Children's Hospitals NHS Foundation Trust, Birmingham.

[j.taylor.1@bham.ac.uk](mailto:j.taylor.1@bham.ac.uk)

+44(0)1214148671

1  
2  
3 **Word count:** 4148 words

4 **Abstract**

5 **Objectives:** Describe the epidemiology of childhood maltreatment and domestic abuse (in  
6 women)

7  
8  
9 **Design:** Analysis of longitudinal records between 1<sup>st</sup> January 1995 to 31<sup>st</sup> December 2018

10  
11  
12 **Setting:** 'The Health Improvement Network' database

13  
14 **Participants:** There were 11,831,850 eligible patients from 787 contributing practices.  
15 Childhood maltreatment and domestic abuse (in women only) were defined as the presence  
16 of a recorded confirmatory Read code.

17  
18  
19 **Outcome measures:** The incidence rate (IR) and prevalence of childhood maltreatment and  
20 domestic abuse between 1996-2017. When exploring childhood maltreatment, the IR and  
21 prevalence are described as a rate in a cohort of only those aged 0-18 years (per 100,000  
22 child years (CY)/per 100,000 child population). Whereas in domestic abuse these measures  
23 are described only in a cohort of women aged 18 and over (per 100,000 adult years (AY)/per  
24 100,000 adult population). An adjusted incidence rate ratio (aIRR) is given to examine the  
25 differences in IRs based on sex, ethnicity and deprivation.

26  
27  
28  
29 **Results:** The IR (IR 60.1; 95% CI 54.3-66.0 per 100,000 CY) and prevalence (416.1; 95% CI  
30 401.3-430.9 per 100,000 child population) of childhood maltreatment rose until 2017. The  
31 aIRR was greater in patients from the most deprived backgrounds (aIRR 5.14; 95% CI 34.57-  
32 5.77 compared to least deprived) and from an ethnic minority community (e.g. Black aIRR  
33 1.25;1.04-1.49 compared to White). When examining domestic abuse in women, in 2017,  
34 the IR was 34.5 (31.4-37.7) per 100,000 AY and prevalence 368.7 (358.7-378.7) per 100,000  
35 adult population. Similarly, the IR was highest in the lowest socio-economic class (aIRR 2.30;  
36 2.71-3.30) and in ethnic minorities (South Asian aIRR 2.14;1.92-2.39 and Black aIRR  
37 1.64;1.42-1.89).

38  
39  
40  
41 **Conclusion:** Despite recent improvements in recording, there is still a substantial under-  
42 recording of maltreatment and abuse within UK primary care records. Approaches must be  
43 implemented to improve recording and detection of childhood maltreatment and domestic  
44 abuse within medical records.

45  
46  
47 **Keywords:** Domestic abuse, childhood maltreatment, epidemiology, primary care, incidence  
48  
49  
50  
51  
52  
53  
54  
55  
56  
57  
58  
59  
60

### Strengths and limitations of this study

- Childhood maltreatment and domestic abuse are global public health issues associated with substantial morbidity and mortality. Public sector bodies, such as those working in healthcare, are in a position to identify and support those who have experienced such traumatic experiences in order to prevent the development of subsequent negative consequences
- To our knowledge this is the first study to describe the incidence and prevalence of domestic abuse using UK primary care data and to update evidence regarding the occurrence of childhood maltreatment in the last two decades
- The study was able to examine patients by age, gender, deprivation and ethnicity. However, for ethnicity there was missing data.
- There is a substantial under-recording of Read codes relating to childhood maltreatment and domestic abuse within this dataset
- There are several explanations for the possible under-recording, these need to be further studied in detail.

## INTRODUCTION

Childhood maltreatment (physical, sexual or emotional abuse and neglect against those under the age of 18 years)<sup>1</sup> and domestic abuse (controlling, coercive, threatening behaviour, violence or abuse between those who are, or have been, intimate partners or family members)<sup>2</sup> are global public health problems. Approximately one third of women and one third of children globally are estimated to have been survivors of domestic abuse and childhood maltreatment respectively.<sup>3,4</sup>

The negative downstream social, psychological and physical health effects of childhood maltreatment and domestic abuse bear a substantial societal cost.<sup>5-10</sup> Therefore, a public health approach is urgently needed to prevent both the occurrence of childhood maltreatment and domestic abuse as well as their secondary consequences. In order to support a public health approach, high quality data recording relating to these exposures plays an important role. Exploring the role of routinely collected data (which due its repeatable nature can be used for surveillance) is crucial in both the estimation of the societal burden of disease as well as the identification of risk and protective factors.<sup>11</sup>

Exposure to domestic abuse and childhood maltreatment remain taboo topics in many cultures, despite the adverse consequences in terms of health and wellbeing, with significant stigma around disclosure of traumatic events.<sup>12,13</sup> As a result, survivors of such traumatic experiences often find it difficult to attend and seek support from public sector authorities such as healthcare staff.<sup>14,15</sup> There are also challenges for healthcare staff to routinely enquire or ask about such experiences in their patients' lives.<sup>16</sup> The combination of barriers to disclosure and enquiry are likely to lead to a hidden burden of domestic abuse and childhood maltreatment not captured in administrative public sector data. However, since introductions of new guidelines in the UK (National Institute of Health and Care Excellence in 2016 and 2017), the hope has been that administrative recording will have improved.<sup>17,18</sup> This drive towards improved reporting is spurred on by UK media and governmental interest in these topics (Examples of high profile events leading to media and governmental interest includes: the death of Baby P, the Jimmy Savile inquiry, Operation Yewtree, the death of Daniel Pelka, the identification and referral to improve safety (IRIS) trial and the consideration of the domestic abuse bill), administrative recording will have improved.<sup>19-23</sup>

Current UK national estimates of domestic abuse are largely derived from self-reported surveys in conjunction with administrative data, where suitable, to overcome the challenge of estimating the hidden burden of abuse which may not be visible to public sector bodies. The crime survey for England and Wales (CSEW) provides useful self-reported information and used in conjunction with police records of the number of recorded domestic abuse incidents to define epidemiological estimates of domestic abuse. In women, the reported prevalence from the CSEW (for those aged 16-59 years old) was 7.9% in the financial year 2017/2018 while the crude estimate derived from police data for the year ending 2017 (not yet available for 2018 for those aged 16 and over) across England was 24.0/1,000 population (in men and women).<sup>24,25</sup>

1  
2  
3 Unfortunately, the use of alternative administrative records pertaining to information on  
4 domestic abuse are largely limited to recording processes such as hospital records. There is  
5 no specific international classification of disease code that are specific to domestic abuse:  
6 The closest matches are T74.1 (physical abuse, confirmed), Y07.0 (spouse or partner,  
7 perpetrator of maltreatment and neglect) and Z63.0 (and problems in a relationship with  
8 spouse or partner) which when specified in adults relate to physical abuse, maltreatment.<sup>26</sup>  
9 However, there are substantial limitations to utilising these codes to describe the  
10 epidemiology of domestic abuse, due to low numbers of such codes being recorded and also  
11 ambiguities in coding practice between hospital trusts.<sup>26</sup>  
12  
13  
14

15 The state of epidemiological estimates when exploring childhood maltreatment suffers from  
16 similar challenges. A recent observational study utilised data from 1858-2016 that was  
17 derived from child mortality records, police recorded-homicides, crimes against children,  
18 child protection data, children in care and data taken from the National Society for the  
19 Prevention of Cruelty to Children (NSPCC) to study long term trends of child maltreatment.  
20 The study found a decreasing long-term trend in child maltreatment until the year 2000 but  
21 reported an increase thereafter.<sup>27</sup> However child mortality continued to decrease.<sup>27</sup> A  
22 recommendation of the report was to further research and establish whether child  
23 maltreatment is continuing to increase.<sup>27</sup> However, once again when taken from the CSEW,  
24 the estimated prevalence of experiencing childhood maltreatment was 18.9% (financial year  
25 end 2016).<sup>28</sup> The information relating to the incidence rate for those at risk of childhood  
26 maltreatment or domestic abuse is low. One approach to attempt to do so is to use records  
27 taken from general practice (GP). A previous study using GP recorded data between 1995 to  
28 2010 explored the incidence rates and prevalence of childhood maltreatment related  
29 concerns (includes information relating to suspected and possible maltreatment) and  
30 identified an increase in incidence and prevalence of maltreatment related concerns  
31 between this time.<sup>29</sup>  
32  
33  
34  
35  
36

37 Considering the limitations which exist in current approaches estimating the burden of  
38 childhood maltreatment and domestic abuse, there is a need to explore the incidence and  
39 prevalence of childhood maltreatment and domestic abuse within general practice records  
40 to 1) gain further insight into the epidemiology of these traumatic exposures 2) identify the  
41 strengths and limitations of using such records to monitor rates of childhood maltreatment  
42 and domestic abuse. Therefore, our aim was to investigate how the incidence and  
43 prevalence of childhood maltreatment and domestic abuse have changed between 1996-  
44 2017 using 'The Health Improvement Network' (THIN) primary care database.  
45  
46  
47

## 48 **METHODS**

### 49 **Study design and data source**

50 Yearly cohort and cross-sectional studies were conducted between 1<sup>st</sup> January 1995 and 31<sup>st</sup>  
51 December 2018 to describe the yearly incidence rate (IR) and prevalence of childhood  
52 maltreatment and domestic abuse. A retrospective cohort study between 1<sup>st</sup> January 1995  
53 and 31<sup>st</sup> December 2018 was conducted to describe the cumulative IR broken down by age  
54 group, gender (in childhood maltreatment), deprivation and ethnicity.  
55  
56  
57

58 During the study period, the dataset consisted of medical records taken from 787 UK  
59 general practices and deemed to be representative of the UK population.<sup>30</sup> THIN records  
60



1  
2  
3 information relating to demographics, disease progression and management.<sup>31</sup> Information  
4 relating to symptoms, examinations, and diagnoses are documented using a hierarchical  
5 clinical coding system called Read codes.<sup>32</sup>  
6  
7

### 8 **Population, exposure and outcomes**

9

10 General practices were eligible for inclusion 12 months following installation of electronic  
11 health records or from the practice's acceptable mortality recording date.<sup>33,34</sup> Inclusion of  
12 data after these points were measures of quality assurance for the dataset. During the study  
13 period from 1<sup>st</sup> January 1995 and 31<sup>st</sup> December 2018, there were 11,831,850 eligible  
14 patient records following this inclusion criteria.  
15  
16

17  
18 The outcomes of interest (childhood maltreatment or domestic abuse) were both defined  
19 by presence of a relevant Read code relating to patient exposure. As the aim of this study  
20 was to examine incidence and prevalence, the code list used to define incidence and  
21 prevalence varied to account for codes that mention a history of the exposure (for the  
22 calculation of prevalence but not for incidence rate). The list of Read codes used in this  
23 study to describe childhood maltreatment/domestic abuse (varied by incidence and  
24 prevalence) are documented in the supplementary (supplementary read code lists) and  
25 selection of such codes are described in previous published work.<sup>9,35-37</sup> Domestic abuse  
26 exposure in this study was limited to only female patients as comparatively very low  
27 numbers of men had recorded incidents of domestic abuse during the study period. The  
28 annual incidence rate and prevalence of domestic abuse experienced by men between  
29 2005-2017 is displayed on supplementary tables 1-2.  
30  
31  
32

33  
34 Dependent on the outcome of interest, there were further inclusion criteria on the study  
35 population which was eligible for inclusion. To calculate the IR and prevalence of childhood  
36 maltreatment, we only included patients under the age of 18 at cohort entry. We enforced a  
37 study criterion that patients would have to exit the study by their 18<sup>th</sup> birthday as they  
38 would no longer be contributing child-years (CY) at risk. During the study period the total  
39 population amounted to 3,045,456 children. In order to calculate the IR and prevalence of  
40 domestic abuse, a female adult cohort was selected who had an eligible cohort entry date  
41 from the age of 18 years onwards (4,982,781 eligible patients). The purpose being to allow  
42 us to calculate an IR of adult years (AY) at risk. Additionally, there is debate about whether  
43 children living in a household where there is domestic abuse overlaps with the definition of  
44 child maltreatment as a form of adverse childhood experience (ACEs).<sup>38</sup> Therefore, to avoid  
45 confusion in definition between childhood maltreatment and experiencing ACEs which  
46 include other markers of household adversity, we have restricted our domestic abuse  
47 population to only those over the age of 18 years.  
48  
49  
50  
51

### 52 **Statistical analysis and follow up**

53 For annual point prevalence, the numerator was the cumulative count of eligible individuals  
54 with any record of domestic abuse (occurred over 18 years) or childhood maltreatment  
55 (occurred under 18 years) identified at the 1<sup>st</sup> January each year from 1996 to 2017 who  
56 were then divided by the total eligible population on the same date (denominator). The  
57 prevalence is described per 100,000 population (in the domestic abuse cohort per 100,000  
58  
59  
60

1  
2  
3 adult population and childhood maltreatment cohort per 100,000 child population) with  
4 their associated confidence intervals (CI).  
5

6  
7 A series of yearly cohort studies were performed to calculate the crude IR of domestic abuse  
8 and childhood maltreatment for each year from 1996 to 2017. The numerator was the new  
9 number of cases in that calendar year, divided by the total number of person-years at risk  
10 (denominator) for the given year. In each annual cohort study to determine IR, the period of  
11 follow up was defined as:  
12

13  
14 Entry date: The latest date of either study start date (1<sup>st</sup> of January each year), one year  
15 after electronic medical records were implemented, one year after the practice reached  
16 acceptable mortality recording date or when the patient met the age inclusion criteria if one  
17 was present (e.g. patients had to reach 18 years before they were eligible for entry into the  
18 domestic abuse study population).  
19

20  
21 Exit date: The earliest date of either study end date (31<sup>st</sup> of December each year), outcome  
22 date (new incident of childhood maltreatment or domestic abuse), death date, transfer date  
23 (when patient moved practice and were censored from the dataset), collection date (last  
24 date the practice contributed to the dataset) and the date when patient's age crosses the  
25 age inclusion criteria (e.g. patients will exit the cohort when they turn 18 for the IR  
26 calculation of childhood maltreatment).  
27  
28

29  
30 Graphical representations of the incidence and prevalence was conducted from years where  
31 there were 5 or more incident cases of domestic abuse (2005) or childhood maltreatment  
32 (1997). The annual IR and prevalence are also stratified by sex (male or female) for  
33 childhood maltreatment.  
34

35  
36 Additionally, the cumulative IR for the whole time period from the 1<sup>st</sup> January 1995 to 31<sup>st</sup>  
37 December 2018 was stratified by age category of outcome incidence (defined using  
38 categories used by the Department of Education to allow for comparison),<sup>39</sup> Townsend  
39 deprivation quintile,<sup>40</sup> ethnicity and sex when using data for the whole time period from the  
40 1<sup>st</sup> January 1995 to 31<sup>st</sup> December 2018.  
41  
42

43  
44 To discern differences between ethnic groups and deprivation quintiles (in the child cohort)  
45 a multivariate (adjusting for each other, sex and age at cohort entry) Poisson regression  
46 offsetting for person years of follow-up was used to calculate an adjusted incidence rate  
47 ratio (aIRR). Where there were missing data in our covariates (Ethnicity and Townsend  
48 quintile), these were treated as a separate missing category and included in the final model.  
49 Significance was set at  $p < 0.05$ .  
50

51  
52 Statistical analysis was conducted using STATA MP/4 v15.1 (Statacorp 2017). Wherever IR,  
53 IRR and prevalence are presented, associated 95% confidence intervals (CI) are given in  
54 conjunction.  
55

### 56 **Patient and public involvement**

57  
58 No patients were actively involved in setting the research question, outcome measures,  
59 study design, results interpretation of write up of the results. There are plans for the results  
60

1  
2  
3 to be disseminated to the community affected by this research through childhood  
4 maltreatment and domestic abuse charities and social media channels.  
5  
6

### 7 **Ethical Approval**

8 Anonymised data were used throughout the study provided by the data provider to the  
9 University of Birmingham. Studies using The Health Improvement Network (THIN) database  
10 have had initial ethical approval from the NHS South-East Multicentre Research Ethics  
11 Committee, subject to prior independent scientific review. The Scientific Review Committee  
12 (IQVIA) approved the study protocol (SRC Reference Number: SRC18THIN034) prior to its  
13 undertaking.  
14  
15

### 16 **RESULTS**

17 During the study period there was a total of 4,603 incident episodes of childhood  
18 maltreatment cohort in a cohort of 3,045,456 children (aged under 18). In the adult female  
19 cohort (aged over 18), there were 5,598 incident recorded episodes of domestic abuse in  
20 the total female population of 4,982,781 patients. Table 1 outlines the characteristics of  
21 both cohorts at cohort entry as well as the patients who were incident cases of childhood  
22 maltreatment and domestic abuse.  
23  
24

#### 25 *Childhood maltreatment*

26 The IR of childhood maltreatment increased from 22.5 per 100,000 CY (95% CI 11.8-33.2) in  
27 1997 to 60.1 per 100,000 CY (95% CI 54.3-66.0) in 2017. There was a steadily increasing trend  
28 from 2007 to 2012 and a steep rise between the year 2012 (IR 30.0; 95% CI 26.8-33.3 per  
29 100,000 CY) and 2013 (IR 52.3; 95% CI 47.9-56.7 per 100,000 CY), after which it remained  
30 relatively stable until 2017. Further details can be seen in figure 1a and supplementary table  
31 3.  
32  
33  
34

35  
36 When broken down by sex, a similar temporal trend is noted between both males and  
37 females. However, the cumulative IR was higher in the female cohort (IR 27.2; 95% CI 26.1-  
38 18.6 per 100,000 CY) was greater when compared to the male cohort (IR 19.4; 95% CI 18.6-  
39 20.3 per 100,000 CY). The IR in females in 2017 was 66.2 (95% CI 57.4-75.1) per 100,000 CY  
40 compared to IR of 54.3 (95% CI 46.5-62.1) per 100,000 CY in males. Further details of the  
41 trends are seen on figure 1 b-c and supplementary tables 4-5.  
42  
43  
44

45 The age range was broken down into the categories 0-1, 1-4, 5-9, 10-15 and 16-17 years.  
46 The group with the highest IR was the 0-1-year cohort (IR 52.7; 95% CI 47.9-58.0 per  
47 100,000 CY) and whereas the 16-17 group (IR 21.2; 95% CI 19.0-23.5 per 100,000 CY) had  
48 the lowest IR (figure 1d and supplementary table 6). When examining by socio-economic  
49 deprivation quintile there was a linear relationship observed between IR and deprivation.  
50 More details are seen in figure 1e and supplementary table 7. Lastly, the IR was higher in  
51 the ethnic minority groups (Black (IR 45.1; 95% CI 37.4-52.9 per 100,000 CY), South Asian (IR  
52 34.7; 95% CI 29.0-40.4 per 100,000 CY) and Other backgrounds (IR 48.1; 95% CI 37.3-58.9  
53 per 100,000 CY)) when compared with those who had a White (IR 27.7; 95% CI 26.5-29.0 per  
54 100,000 CY) or mixed ethnicity (IR 21.8; 95% CI 13.4-30.2 per 100,000 CY). Further details  
55 are provided in figure 1e and supplementary table 8.  
56  
57  
58  
59  
60

1  
2  
3 The prevalence of childhood maltreatment steadily increased from 176.3 (95% CI 132.8-  
4 219.8) per 100,000 child population in 1997 to 416.1 (95% CI 401.3-430.9) per 100,000  
5 population in 2017. This can be seen in figure 2 and supplementary table 9.  
6  
7

8 In the multivariate analysis following adjustment for age at cohort entry, sex and  
9 deprivation quintile, the increased risk apparent in South Asians compared to White  
10 children was not evident (aIRR 1.06; 95% CI 0.89-1.26). However, the Black (aIRR 1.25; 95%  
11 CI 1.04-1.49) and other (aIRR 1.45; 95% CI 1.15-1.82) populations were at a greater risk. In  
12 the above analysis there was a gradient increase observed in the risk of childhood  
13 maltreatment with worsening deprivation. The most deprived quintile had a five-fold  
14 increased risk of childhood maltreatment (aIRR 5.14; 95% CI 4.57-5.77). Further details are  
15 seen in supplementary table 10.  
16  
17

### 18 *Domestic abuse*

19 The IR of domestic abuse increased from 0.3 per 100,000 AY (95% CI 0.0-0.6) in 2005 to 34.6  
20 per 100,000 AY (95% CI 31.4-37.7) in 2017. The trend was increasing relatively steadily  
21 from 2006 to 2013 followed by a steep increase in 2014 (IR 35.8; 95% CI 33.2-38.5 per  
22 100,000 AY). Further details can be seen in figure 3a and supplementary table 11.  
23  
24  
25  
26  
27

28 The age range was broken down into the categories 18-24, 25-34, 35-44, 45-54, 55-64 and  
29 over 65 years. The groups with the highest IR were 18-24 (IR 33.0; 95% CI 31.2-34.9 per  
30 100,000 AY) and 25-34-year cohorts (IR 33.7; 95% CI 32.2-35.3 per 100,000 AY), followed by  
31 a decline by age group. Further details are seen in figure 3b and supplementary table 12.  
32 When examining by deprivation quintile, again a linear trend was seen where there was a  
33 fourfold increased risk of new domestic abuse incidence in the most deprived quintile (IR  
34 36.3; 95% CI 34.3-38.3 per 100,000 AY) compared to the least deprived (IR 8.9; 95% CI 8.2-  
35 9.6 per 100,000 AY). More information can be found in figure 3c and supplementary table  
36 13. Lastly, similar to childhood maltreatment, a disparity was seen in relation to ethnic  
37 group, where Black (IR 55.0; 95% CI 47.7-62.6 per 100,000 AY), South Asian (IR 65.4; 95% CI  
38 58.6-72.2 per 100,000 AY) and Other background (IR 73.6; 95% CI 57.4-89.7 per 100,000  
39 AY) had a higher incidence rate when compared with those who had a White (IR 21.5; 95%  
40 CI 20.7-22.3 per 100,000 AY) or mixed ethnic (IR 36.8; 95% CI 29.4-44.2 per 100,000 AY)  
41 background. Figure 4 and supplementary table 14 contain additional detail.  
42  
43  
44  
45

46 The prevalence of domestic abuse increased in an almost linear manner from 16.0 (95% CI  
47 14.0-17.9) per 100,000 adult population to 368.7 (95% CI 358.7-378.9) per 100,000 adult  
48 population in 2017. This can be seen in figure 4 and from supplementary table 15.  
49  
50

51 In the multivariate regression analysis, it was evident that ethnicity played a factor in the  
52 risk of domestic abuse. South Asians (aIRR 2.14; 95% CI 1.92-2.39), Black (aIRR 1.64; 95% CI  
53 1.42-1.89) and Other (aIRR 2.19; 95% CI 1.75-2.73) populations were all at a greater risk  
54 than the White cohort. Similar to childhood maltreatment there was a gradient increase  
55 between worsening deprivation and the risk of domestic abuse. The most deprived quintile  
56 had an aIRR of 2.30; 95%CI 2.71-3.30. Further details contained within supplementary table  
57 16.  
58  
59  
60

## DISCUSSION

### Summary of key findings

The IR of both childhood maltreatment and domestic abuse increased until 2017 (60.1 (95% CI 54.3-66.0) per 100,000 CY and 34.6 (95% CI 31.4-37.7) per 100,000 AY respectively in 2017). Additionally, the prevalence of both childhood maltreatment and domestic abuse continued to increase in a linear fashion until 2017. Of interest there were similar patterns of risk in both groups. For both childhood maltreatment and domestic abuse, there was a substantially increased aIRR seen in those from a more deprived background when compared to the least deprived, and a greater incidence rate of new cases of both childhood maltreatment and domestic abuse in those from an ethnic minority background despite taking into account other co-variables. The IR was also highest in the 0-1-year group and in females for childhood maltreatment and the 18-24-year group for those experiencing domestic abuse. The most notable finding is the high level of under-recording of childhood maltreatment and domestic abuse in the dataset in comparison to those reported in self-reported surveys including the CSEW and NSPCC survey.

### Comparison to current literature

As this was the first cohort to the authors' knowledge to explore the annual incidence and prevalence of domestic abuse (in women) using UK primary care records, it is difficult to compare the incidence rates directly with other studies. However for childhood maltreatment, one previous study (including data from 1995-2010) reported the IR of childhood maltreatment related concerns using THIN.<sup>29</sup> The maltreatment related concern codes included cases of suspected or probable maltreatment which would explain why their documented IR and prevalence are substantially higher than those reported in our study.<sup>29</sup> However, of note in that study they demonstrated an increased IR of childhood maltreatment related concerns in those in the under one group, those who are female and almost a five times increased risk in those from the most deprived group when compared to the lowest group, all of which are similar to our findings.<sup>29</sup>

Of particular note, a key finding of our study was the prevalence and IR were much lower than estimates derived from currently existing sources of childhood maltreatment and domestic abuse epidemiology. When examining UK police reports of domestic abuse, although for both genders, the prevalence in England was 24.0 per 1,000 population, much higher than in our study even though we only included a female denominator population.<sup>24</sup> When compared to the CSEW data which showed a prevalence of 7.9% in women, our figure seems even lower.<sup>25</sup> Similarly, although no combined child maltreatment figure exists for police reports, if we examine the estimated prevalence from the CSEW which suggested 18.9% of all adults have experienced some form of childhood maltreatment our figure of 4.2 per 1,000 population (2017) is substantially lower.<sup>28</sup> When compared to other administrative data such as children in need data, which contains the rate of children on Child protection plans, GP recorded prevalence still remains low, which has also been shown in previous literature on maltreatment related concerns.<sup>29,41</sup>

The low values of incidence and prevalence of childhood maltreatment and domestic abuse and other interesting findings resonate and build on known literature. There have been national policy reports highlighting inconsistencies in data collected relating domestic abuse

1  
2  
3 and childhood maltreatment to poverty and ethnicity.<sup>42,43</sup> However, we clearly demonstrate  
4 a linear relationship between IR and socio-economic deprivation following adjustment for  
5 ethnicity. When adjusting for deprivation, GP data still highlights the burden of  
6 maltreatment and abuse experienced in ethnic minorities (although South Asians were not  
7 at a higher risk of childhood maltreatment, and mixed raced individuals were not at a higher  
8 risk of either childhood maltreatment or domestic abuse). It has been previously highlighted  
9 that black and minority ethnic children are over-represented in child protection records  
10 within the UK, but this may be related to poverty (a form of which we have been able to  
11 adjust for in our study), isolation and willingness to seek help due to stigma in some  
12 communities.<sup>44</sup> In contrast to our findings, the prevalence reported for domestic abuse  
13 exposure CSEW was highest in those from a mixed race background, and lower in those  
14 from the South Asian, Black or Other community.<sup>25</sup>  
15  
16  
17  
18

19 There are clear messages that need to be taken from this study relating to the under-  
20 recording of domestic abuse and childhood maltreatment in GP records. Although  
21 approaches and intervention have been implemented and evaluated to record both of these  
22 traumatic experiences, more needs to be done.<sup>23,45</sup> Healthcare professionals should be  
23 aware of the morbidity burden caused by such exposures and also the referral tools at their  
24 disposal highlighted in recent national guidelines.<sup>17,18</sup> Attempts to overcome barriers in  
25 asking about domestic abuse and childhood maltreatment such as the use of short question  
26 proformas are options to be trialled more broadly.<sup>46</sup> Although recording of domestic abuse  
27 and childhood maltreatment do not yet fall under the incentivised payment system for GPs,  
28 it should be strongly encouraged to improve our recording and implementation of  
29 appropriate referral mechanisms.<sup>47</sup>  
30  
31  
32  
33

### 34 **Strengths and limitations**

35 Although our data are derived from a large population-based cohort, the results  
36 demonstrate substantial under-recording of childhood maltreatment and domestic abuse.  
37 Therefore, our results are likely to underestimate the burden of childhood maltreatment  
38 and domestic abuse by GPs. The increasing trends in IR and prevalence suggest that  
39 recording is improving and with the introduction of national guidelines and standards, this  
40 will continue to improve.<sup>17,18</sup> Before this dataset can be used for surveillance purposes or  
41 tracking of long term trends in childhood maltreatment or domestic abuse, there need to be  
42 further improvements in the rate of recording and reporting. Although this study was not  
43 designed to assess the impact of public policy or media attention at certain time points, it is  
44 also possible that spikes in IR seen in the dataset such as in 2012-2013 in the childhood  
45 maltreatment cohort may be related to high profile news events such as the exposure of  
46 Jimmy Savile which was shown to result in an increase of reports of childhood maltreatment  
47 to UK statutory bodies.<sup>48</sup>  
48  
49  
50  
51

52 In our IR subgroup analysis, we also have limitations in the recorded ethnicity of patients  
53 (highlighted in table 1). Ethnicity recording has historically been poor, although improving in  
54 primary care data, with missing rates of around 50%.<sup>49</sup> Therefore, future research should  
55 aim to explore the IR of these outcomes in other cohorts which have utilised similar UK  
56 census categories for ethnicity.  
57  
58

### 59 **Conclusion**

1  
2  
3 In conclusion, our study showed an in-depth exploration of the incidence rate and  
4 prevalence trends of childhood maltreatment and domestic abuse using UK primary care  
5 records. It is clear that there is a severe under-reporting of both of these important  
6 exposures which relate to substantial morbidity and mortality burdens. Therefore,  
7 approaches to improve recording of abuse and strategies to detect and prevent negative  
8 consequences of childhood maltreatment and domestic abuse should be implemented.  
9  
10

### 11 **Figure legends:**

12  
13  
14 **Figure 1:** The incidence rate of childhood maltreatment broken down by sex, age,  
15 deprivation and ethnicity  
16

17  
18 **Figure 2:** Prevalence of childhood maltreatment: 1997-2017  
19

20  
21 **Figure 3:** The incidence rate of domestic abuse broken down by age, deprivation and  
22 ethnicity  
23

24  
25 **Figure 4:** Prevalence of domestic abuse: 2005-2017  
26

### 27 **Acknowledgements**

28 The study team would like to thank Dr Anuradhaa Subramanian for her support with the  
29 statistical analysis.  
30

### 31 **Data statement**

32 The original data can be requested from the study team. However, ethics approval may  
33 need to be sought by the data provider prior to release of data.  
34  
35

### 36 **Author contributions**

37 This study contributed to the PhD thesis for the main author JSC. JSC, JT, SB and KN were  
38 responsible for initial conception of the study. JSC was responsible for data extraction,  
39 analysis and first draft of the manuscript. The final manuscript was authorised by all the  
40 authors with JT providing expert knowledge on childhood maltreatment, whereas SB and KN  
41 provided methodological expertise.  
42  
43

### 44 **Funding**

45 There is no funding to declare in this study.  
46  
47

### 48 **Declaration of Interests**

49 All authors have completed the ICMJE uniform disclosure form  
50 at [www.icmje.org/coi\\_disclosure.pdf](http://www.icmje.org/coi_disclosure.pdf) and declare: no support from any organisation for the  
51 submitted work, no financial relationships with any organisations that might have an  
52 interest in the submitted work in the previous three years, no other relationships or  
53 activities that could appear to have influenced the submitted work.  
54  
55  
56  
57  
58  
59  
60

## References

- 1 HM Government. Working Together to Safeguard Children: A guide to inter-agency working to safeguard and promote the welfare of children. 2018[https://assets.publishing.service.gov.uk/government/uploads/system/uploads/attachment\\_data/file/722305/Working\\_Together\\_to\\_Safeguard\\_Children\\_-\\_Guide.pdf](https://assets.publishing.service.gov.uk/government/uploads/system/uploads/attachment_data/file/722305/Working_Together_to_Safeguard_Children_-_Guide.pdf) (accessed 11 Jul2018).
- 2 HM Government. Guidance: Domestic violence and abuse. UK Gov. 2016.<https://www.gov.uk/guidance/domestic-violence-and-abuse#domestic-violence-and-abuse-new-definition> (accessed 19 Feb2018).
- 3 World Health Organization. Child maltreatment. 2017[https://www.who.int/violence\\_injury\\_prevention/violence/child/Child\\_maltreatment\\_infographic\\_EN.pdf?ua=1](https://www.who.int/violence_injury_prevention/violence/child/Child_maltreatment_infographic_EN.pdf?ua=1) (accessed 16 Dec2019).
- 4 World Health Organization. Global and regional estimates of violence against women. 2014.<https://www.who.int/reproductivehealth/publications/violence/9789241564625/en/> (accessed 16 Dec2019).
- 5 Bellis MA, Hughes K, Ford K, Ramos Rodriguez G, Sethi D, Passmore J. Life course health consequences and associated annual costs of adverse childhood experiences across Europe and North America: a systematic review and meta-analysis. *Lancet Public Heal* 2019; **0**. doi:10.1016/S2468-2667(19)30145-8.
- 6 Gilbert R, Widom CS, Browne K, Fergusson D, Webb E, Janson S. Burden and consequences of child maltreatment in high-income countries. *Lancet* 2009; **373**: 68–81.
- 7 Bacchus LJ, Ranganathan M, Watts C, Devries K. Recent intimate partner violence against women and health: a systematic review and meta-analysis of cohort studies. *BMJ Open* 2018; **8**: e019995.
- 8 Krug EG, Dahlberg LL, Mercy JA, Zwi AB, Lozano R. World report on violence and health. [http://apps.who.int/iris/bitstream/handle/10665/42495/9241545615\\_eng.pdf;jsessionid=38974668595BA31895E557DC1CB1EFEC?sequence=1](http://apps.who.int/iris/bitstream/handle/10665/42495/9241545615_eng.pdf;jsessionid=38974668595BA31895E557DC1CB1EFEC?sequence=1) (accessed 4 Jul2018).
- 9 Chandan JS, Thomas T, Gokhale KM, Bandyopadhyay S, Taylor J, Nirantharakumar K. The burden of mental ill health associated with childhood maltreatment in the UK, using The Health Improvement Network database: a population-based retrospective cohort study. *The lancet Psychiatry* 2019; **6**: 926–934.
- 10 Chandan JS, Thomas T, Bradbury-Jones C, Russell R, Bandyopadhyay S, Nirantharakumar K *et al*. Female survivors of intimate partner violence and risk of depression, anxiety and serious mental illness. *Br J Psychiatry* 2019; : 1–6.
- 11 World Health Organization. The public health approach. WHO. 2011.[http://www.who.int/violenceprevention/approach/public\\_health/en/](http://www.who.int/violenceprevention/approach/public_health/en/) (accessed 8 Nov2018).
- 12 Overstreet NM, Quinn DM. The Intimate Partner Violence Stigmatization Model and Barriers to Help-Seeking. *Basic Appl Soc Psych* 2013; **35**: 109–122.
- 13 Allnock D, Miller P. No one noticed no one heard report. 2013.<https://pdfs.semanticscholar.org/7258/5f8e2269c865ac7c42aaf0e4bec5224a938b.pdf> (accessed 29 Jul2019).
- 14 Smith CS. Coping Strategies of Female Victims of Child Abuse in Treatment for Substance Abuse Relapse: Their Advice to Other Women and Healthcare



- 1  
2  
3  
4  
5  
6  
7  
8  
9  
10  
11  
12  
13  
14  
15  
16  
17  
18  
19  
20  
21  
22  
23  
24  
25  
26  
27  
28  
29  
30  
31  
32  
33  
34  
35  
36  
37  
38  
39  
40  
41  
42  
43  
44  
45  
46  
47  
48  
49  
50  
51  
52  
53  
54  
55  
56  
57  
58  
59  
60
- Professionals. *J Addict Nurs* 2007; **18**: 75–80.
- 15 Robinson L, Spilsbury K. Systematic review of the perceptions and experiences of  
accessing health services by adult victims of domestic violence. *Health Soc Care  
Community* 2007; **16**: 16–30.
- 16 Taket A. Responding to domestic violence in primary care. *BMJ* 2012; **344**: e757.
- 17 NICE. Overview | Child abuse and neglect | Guidance | NICE.  
2017.<https://www.nice.org.uk/guidance/ng76> (accessed 16 Dec2019).
- 18 NICE. Overview | Domestic violence and abuse | Quality standards | NICE.  
2016.<https://www.nice.org.uk/guidance/qs116> (accessed 16 Dec2019).
- 19 Parish E. Who should we blame for the death of Baby P? *BMJ* 2014; **349**: g6643.
- 20 STAFFORDSHIRE & STOKE-ON-TRENT SAFEGUARDING CHILDREN BOARDS. LESSONS  
TO BE LEARNED BRIEFING NO. 16: IN RESPECT OF THE DEATH OF DANIEL PELKA.  
2013[https://www.staffordbc.gov.uk/sites/default/files/cme/DocMan1/PolicyAndImp  
rovement/Serious--Case-Review---Daniel-Pelka.pdf](https://www.staffordbc.gov.uk/sites/default/files/cme/DocMan1/PolicyAndImprovement/Serious--Case-Review---Daniel-Pelka.pdf) (accessed 16 Dec2019).
- 21 Department for Education. Investigations relating to Jimmy Savile - GOV.UK.  
2015[https://www.gov.uk/government/publications/investigations-relating-to-jimmy-  
savile](https://www.gov.uk/government/publications/investigations-relating-to-jimmy-savile) (accessed 16 Dec2019).
- 22 UK Parliament. Domestic Abuse Bill 2017-19.  
2017.<https://services.parliament.uk/bills/2017-19/domesticabuse.html> (accessed 16  
Dec2019).
- 23 Feder G, Davies RA, Baird K, Dunne D, Eldridge S, Griffiths C *et al*. Identification and  
Referral to Improve Safety (IRIS) of women experiencing domestic violence with a  
primary care training and support programme: a cluster randomised controlled trial.  
*Lancet* 2011; **378**: 1788–1795.
- 24 Public health England. Public Health Profiles domestic abuse.  
2018.[https://fingertips.phe.org.uk/search/Domestic  
Abuse#page/4/gid/1/pat/6/par/E12000004/ati/102/are/E06000015/iid/92863/age/1  
64/sex/4](https://fingertips.phe.org.uk/search/DomesticAbuse#page/4/gid/1/pat/6/par/E12000004/ati/102/are/E06000015/iid/92863/age/164/sex/4) (accessed 16 Dec2019).
- 25 Office for national statistics. Domestic abuse in England and Wales: year ending  
March 2018.  
2018.[https://www.ons.gov.uk/peoplepopulationandcommunity/crimeandjustice/bull  
etins/domesticabuseinenglandandwales/yearendingmarch2018#prevalence-of-  
domestic-abuse](https://www.ons.gov.uk/peoplepopulationandcommunity/crimeandjustice/bulletins/domesticabuseinenglandandwales/yearendingmarch2018#prevalence-of-domestic-abuse).
- 26 Olive P. Intimate partner violence and clinical coding: issues with the use of the  
International Classification of Disease (ICD-10) in England. *J Health Serv Res Policy*  
2018; **23**: 212–221.
- 27 Degli Esposti M, Humphreys DK, Jenkins BM, Gasparrini A, Pooley S, Eisner M *et al*.  
Long-term trends in child maltreatment in England and Wales, 1858-2016: an  
observational, time-series analysis. *Lancet Public Heal* 2019; **4**: e148–e158.
- 28 Office for National Statistics. Abuse during childhood.  
2016.[https://www.ons.gov.uk/peoplepopulationandcommunity/crimeandjustice/arti  
cles/abuseduringchildhood/findingsfromtheyearendingmarch2016crimesurveyforeng  
landandwales](https://www.ons.gov.uk/peoplepopulationandcommunity/crimeandjustice/articles/abuseduringchildhood/findingsfromtheyearendingmarch2016crimesurveyforenglandandwales) (accessed 16 Dec2019).
- 29 Woodman J, Freemantle N, Allister J, de Lusignan S, Gilbert R, Petersen I. Variation in  
recorded child maltreatment concerns in UK primary care records: a cohort study  
using The Health Improvement Network (THIN) database. *PLoS One* 2012; **7**: e49808.
- 30 Blak BT, Thompson M, Dattani H, Bourke A. Generalisability of The Health

- 1  
2  
3 Improvement Network (THIN) database: demographics, chronic disease prevalence  
4 and mortality rates. *Inform Prim Care* 2011; **19**: 251–5.  
5  
6 31 IQVIA. IQVIA Medical Research Data - Health Research Authority.  
7 2018.[https://www.hra.nhs.uk/planning-and-improving-research/application-](https://www.hra.nhs.uk/planning-and-improving-research/application-summaries/research-summaries/the-health-improvement-network-thin-database/)  
8 [summaries/research-summaries/the-health-improvement-network-thin-database/](https://www.hra.nhs.uk/planning-and-improving-research/application-summaries/research-summaries/the-health-improvement-network-thin-database/)  
9 (accessed 20 Aug2019).  
10  
11 32 Booth N. What are the Read Codes? *Health Libr Rev* 1994; **11**: 177–82.  
12 33 Maguire A, Blak BT, Thompson M. The importance of defining periods of complete  
13 mortality reporting for research using automated data from primary care.  
14 *Pharmacoepidemiol Drug Saf* 2009; **18**: 76–83.  
15 34 Horsfall L, Walters K, Petersen I. Identifying periods of acceptable computer usage in  
16 primary care research databases. *Pharmacoepidemiol Drug Saf* 2013; **22**: 64–69.  
17 35 Chandan JS, Thomas T, Bradbury-Jones C, Russell R, Bandyopadhyay S,  
18 Nirantharakumar K *et al*. Female survivors of intimate partner violence and risk of  
19 depression, anxiety and serious mental illness. *Br J Psychiatry* 2019; : 1–6.  
20 36 Chandan JS, Thomas T, Bradbury-Jones C, Taylor J, Bandyopadhyay S,  
21 Nirantharakumar K. Intimate partner violence and temporomandibular joint disorder.  
22 *J Dent* 2019; **82**: 98–100.  
23 37 Chandan JS, Thomas T, Raza K, Bandyopadhyay S, Nirantharakumar K, Taylor J.  
24 Association between child maltreatment and central sensitivity syndromes: A  
25 systematic review protocol. *BMJ Open*. 2019; **9**: bmjopen-2018-025436.  
26 38 Hughes K, Bellis MA, Hardcastle KA, Sethi D, Butchart A, Mikton C *et al*. The effect of  
27 multiple adverse childhood experiences on health: a systematic review and meta-  
28 analysis. *Lancet Public Heal* 2017; **2**: e356–e366.  
29 39 Department for Education. Children looked after in England including adoption: 2018  
30 to 2019 - GOV.UK. 2019.[https://www.gov.uk/government/statistics/children-looked-](https://www.gov.uk/government/statistics/children-looked-after-in-england-including-adoption-2018-to-2019)  
31 [after-in-england-including-adoption-2018-to-2019](https://www.gov.uk/government/statistics/children-looked-after-in-england-including-adoption-2018-to-2019) (accessed 15 Dec2019).  
32 40 Townsend P, Phillimore P, Beattie A. Health and deprivation: inequality and the  
33 North. 1988. *London Croom Helm Google Sch* 1988.  
34 41 Public Health England. Public Health Profiles Children subject to a child protection  
35 plan with initial category of abuse: rate per 10,000 children aged under 18.  
36 2019.[https://fingertips.phe.org.uk/search/child](https://fingertips.phe.org.uk/search/child-protection#page/4/gid/1/pat/6/par/E12000004/ati/102/are/E06000015/iid/92853/age/173/sex/4)  
37 [protection#page/4/gid/1/pat/6/par/E12000004/ati/102/are/E06000015/iid/92853/a](https://fingertips.phe.org.uk/search/child-protection#page/4/gid/1/pat/6/par/E12000004/ati/102/are/E06000015/iid/92853/age/173/sex/4)  
38 [ge/173/sex/4](https://fingertips.phe.org.uk/search/child-protection#page/4/gid/1/pat/6/par/E12000004/ati/102/are/E06000015/iid/92853/age/173/sex/4) (accessed 16 Dec2019).  
39 42 Eldin Fahmy, Emma Williamson CP. Evidence and policy review: Domestic violence  
40 and poverty. 2016 doi:[https://research-](https://research-information.bris.ac.uk/en/publications/evidence-and-policy-review(af69c4ab-ff0b-4392-9318-890dc0fcc359).html)  
41 [information.bris.ac.uk/en/publications/evidence-and-policy-review\(af69c4ab-ff0b-](https://research-information.bris.ac.uk/en/publications/evidence-and-policy-review(af69c4ab-ff0b-4392-9318-890dc0fcc359).html)  
42 [4392-9318-890dc0fcc359\).html](https://research-information.bris.ac.uk/en/publications/evidence-and-policy-review(af69c4ab-ff0b-4392-9318-890dc0fcc359).html).  
43 43 Bywaters P, Bunting L, Davidson G, Hanratty J. The relationship between poverty,  
44 child abuse and neglect: an evidence review. 2016; : 74.  
45 44 Owen C, Statham J. Disproportionality in child welfare : the prevalence of black and  
46 minority ethnic children within the ‘looked after’ and ‘children in need’ populations  
47 and on child protection registers in England.  
48 2009.[https://www.semanticscholar.org/paper/Disproportionality-in-child-welfare-](https://www.semanticscholar.org/paper/Disproportionality-in-child-welfare-%3A-the-of-black-Owen-Statham/c3bec39040bc3816b2bce4cde6e51dc05321996b)  
49 [%3A-the-of-black-Owen-Statham/c3bec39040bc3816b2bce4cde6e51dc05321996b](https://www.semanticscholar.org/paper/Disproportionality-in-child-welfare-%3A-the-of-black-Owen-Statham/c3bec39040bc3816b2bce4cde6e51dc05321996b)  
50 (accessed 16 Dec2019).  
51 52 53 54 55 56 57 58 59 60

- 1  
2  
3 simple clinical coding strategy to improve recording of child maltreatment concerns:  
4 an audit study. *Br J Gen Pract* 2014; **64**: 389–90.  
5  
6 46 Gerbert B, Moe J, Caspers N, Salber P, Feldman M, Herzig K *et al*. Simplifying  
7 physicians' response to domestic violence. *West J Med* 2000; **172**: 329–31.  
8  
9 47 National Institute for Health and Care Excellence. Quality and Outcomes Framework  
10 Indicators - Standards & Indicators. 2016.[https://www.nice.org.uk/Standards-and-](https://www.nice.org.uk/Standards-and-Indicators/QOFIndicators)  
11 Indicators/QOFIndicators (accessed 28 Jul2019).  
12  
13 48 NSPCC. Giving victims a voice.  
14 2013.[https://www.nspcc.org.uk/globalassets/documents/research-reports/yewtree-](https://www.nspcc.org.uk/globalassets/documents/research-reports/yewtree-report-giving-victims-voice-jimmy-savile.pdf)  
15 report-giving-victims-voice-jimmy-savile.pdf (accessed 16 Dec2019).  
16  
17 49 Mathur R, Bhaskaran K, Chaturvedi N, Leon DA, vanStaa T, Grundy E *et al*.  
18 Completeness and usability of ethnicity data in UK-based primary care and hospital  
19 databases. *J Public Health (Oxf)* 2014; **36**: 684.  
20  
21  
22  
23  
24  
25  
26  
27  
28  
29  
30  
31  
32  
33  
34  
35  
36  
37  
38  
39  
40  
41  
42  
43  
44  
45  
46  
47  
48  
49  
50  
51  
52  
53  
54  
55

56 **Table 1: Baseline characteristics of both the child and female adult cohort**

|  | <b>Child cohort<br/>(Under 18 years)</b> |  |  | <b>Female adult<br/>cohort (Over 18<br/>years)</b> |  |
|--|------------------------------------------|--|--|----------------------------------------------------|--|
|  |                                          |  |  |                                                    |  |

|                                   | Total cohort    | Incident childhood maltreatment cases |                                   | Total cohort    | Incident domestic abuse cases |
|-----------------------------------|-----------------|---------------------------------------|-----------------------------------|-----------------|-------------------------------|
| <b>Number of patients</b>         | 3045456         | 4603                                  | <b>Number of patients</b>         | 4982781         | 5598                          |
| <b>Sex</b>                        |                 |                                       | <b>Sex</b>                        |                 |                               |
| Male                              | 1570986 (51.6%) | 2041 (44.3%)                          |                                   |                 |                               |
| Female                            | 1474470 (48.4%) | 2562 (55.7%)                          | Female                            | 4982781 (100%)  | 5598 (100%)                   |
| <b>Age at cohort entry</b>        |                 |                                       | <b>Age at cohort entry</b>        |                 |                               |
| 0-1 years                         | 1030637 (33.8%) | 1757 (38.2%)                          | 18-24 years                       | 1211022 (24.3%) | 1897 (33.9%)                  |
| 1-4 years                         | 607294 (19.9%)  | 1184 (25.7%)                          | 25-34 years                       | 1138926 (22.9%) | 1939 (34.6%)                  |
| 5-9 years                         | 580306 (19.1%)  | 886 (19.3%)                           | 35-44 years                       | 777795 (15.6%)  | 1136 (20.3%)                  |
| 10-15 years                       | 611693 (20.1%)  | 672 (14.6%)                           | 45-54 years                       | 596443 (12.0%)  | 411 (7.3%)                    |
| 16-17 years                       | 215526 (7.1%)   | 104 (2.3%)                            | 55-64 years                       | 470107 (9.4%)   | 145 (2.6%)                    |
|                                   |                 |                                       | 65+ years                         | 788488 (15.8%)  | 70 (1.3%)                     |
| <b>Ethnicity</b>                  |                 |                                       | <b>Ethnicity</b>                  |                 |                               |
| White                             | 1089894 (35.8%) | 1854 (40.3%)                          | White                             | 2017299 (40.5%) | 2905 (51.9%)                  |
| Mixed race                        | 31067 (1.0%)    | 26 (0.6%)                             | Mixed race                        | 69270 (1.4%)    | 99 (1.8%)                     |
| Black                             | 63244 (2.1%)    | 135 (2.9%)                            | Black                             | 80974 (1.6%)    | 212 (3.8%)                    |
| South Asian                       | 80486 (2.6%)    | 145 (3.2%)                            | South Asian                       | 109117 (2.2%)   | 374 (6.7%)                    |
| Others                            | 37318 (1.2%)    | 82 (1.8%)                             | Others                            | 27071 (0.5%)    | 87 (1.6%)                     |
| Missing                           | 1743447 (57.3%) | 2361 (51.3%)                          | Missing                           | 2679050 (53.8%) | 1921 (32.3%)                  |
| <b>Townsend Deprivation Index</b> |                 |                                       | <b>Townsend Deprivation Index</b> |                 |                               |
| 1 (Least deprived)                | 536645 (17.6%)  | 378 (8.2%)                            | 1 (Least deprived)                | 9107759 (18.3%) | 614 (11.0%)                   |
| 2                                 | 482613 (15.9%)  | 418 (9.1%)                            | 2                                 | 848614 (17.0%)  | 664 (11.9%)                   |
| 3                                 | 538247 (17.7%)  | 729 (15.8%)                           | 3                                 | 904034 (18.1%)  | 959 (17.1%)                   |
| 4                                 | 524151 (17.2%)  | 1080 (23.5%)                          | 4                                 | 849248 (17.0%)  | 1225 (21.9%)                  |
| 5 (Most deprived)                 | 410246 (13.5%)  | 1279 (27.8%)                          | 5 (Most deprived)                 | 612744 (12.3%)  | 1322 (23.6%)                  |
| Missing                           | 553554 (18.2%)  | 719 (15.6%)                           | Missing                           | 857382 (17.2%)  | 814 (14.5%)                   |

1  
2  
3  
4  
5  
6  
7  
8  
9  
10  
11  
12  
13  
14  
15  
16  
17  
18  
19  
20  
21  
22  
23  
24  
25  
26  
27  
28  
29  
30  
31  
32  
33  
34  
35  
36  
37  
38  
39  
40  
41  
42  
43  
44  
45  
46  
47  
48  
49  
50  
51  
52  
53  
54  
55  
56  
57  
58  
59  
60

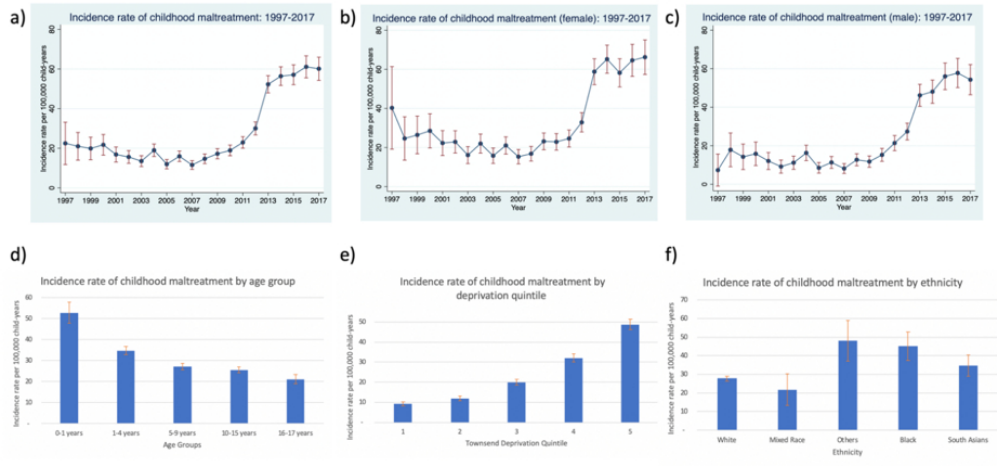

The incidence rate of childhood maltreatment broken down by sex, age, deprivation and ethnicity

1  
2  
3  
4  
5  
6  
7  
8  
9  
10  
11  
12  
13  
14  
15  
16  
17  
18  
19  
20  
21  
22  
23  
24  
25  
26  
27  
28  
29  
30  
31  
32  
33  
34  
35  
36  
37  
38  
39  
40  
41  
42  
43  
44  
45  
46  
47  
48  
49  
50  
51  
52  
53  
54  
55  
56  
57  
58  
59  
60

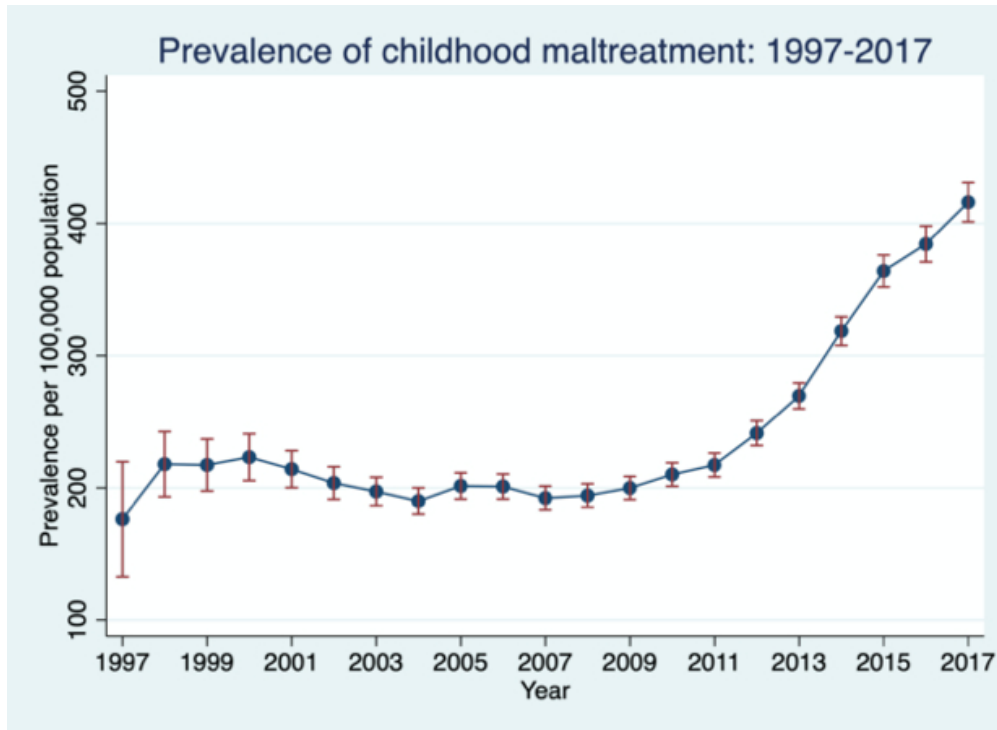

Prevalence of childhood maltreatment: 1997-2017

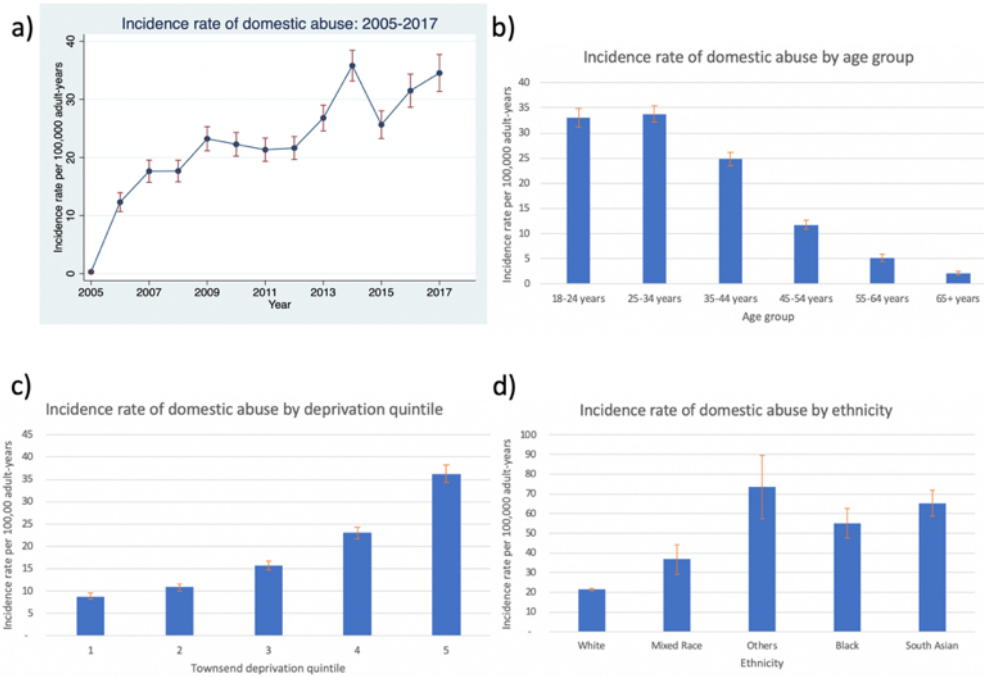

The incidence rate of domestic abuse broken down by age, deprivation and ethnicity

1  
2  
3  
4  
5  
6  
7  
8  
9  
10  
11  
12  
13  
14  
15  
16  
17  
18  
19  
20  
21  
22  
23  
24  
25  
26  
27  
28  
29  
30  
31  
32  
33  
34  
35  
36  
37  
38  
39  
40  
41  
42  
43  
44  
45  
46  
47  
48  
49  
50  
51  
52  
53  
54  
55  
56  
57  
58  
59  
60

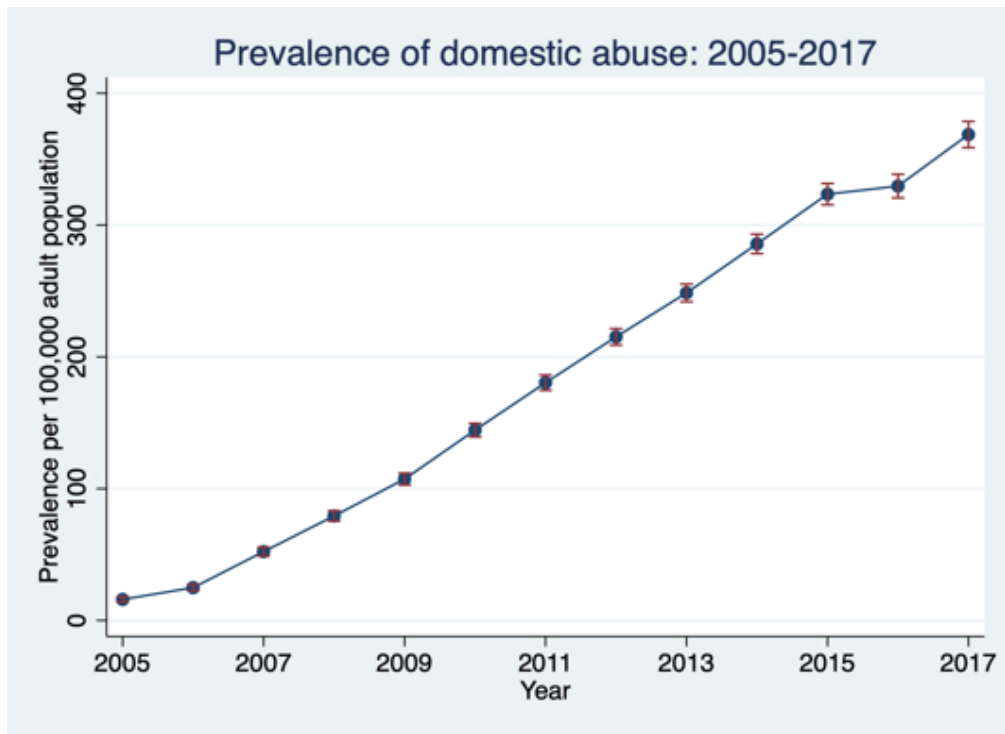

Prevalence of domestic abuse: 2005-2017



# Supplementary

## Table of Contents

|                                                                                                                  |           |
|------------------------------------------------------------------------------------------------------------------|-----------|
| <b>Supplementary.....</b>                                                                                        | <b>1</b>  |
| <b>Read code lists .....</b>                                                                                     | <b>2</b>  |
| <b>Supplementary table 1: Annual incidence rate of domestic abuse in men between 2005-2017.....</b>              | <b>8</b>  |
| <b>Supplementary table 2: Prevalence of domestic abuse in men between 2005-2017 .....</b>                        | <b>9</b>  |
| <b>Supplementary table 3: Annual incidence rate of childhood maltreatment between 1996-2017</b>                  | <b>10</b> |
| <b>Supplementary table 4: Incidence rate of childhood maltreatment in females between 1996-2017 .....</b>        | <b>11</b> |
| <b>Supplementary table 5: Incidence rate of childhood maltreatment in males between 1996-2017 .....</b>          | <b>12</b> |
| <b>Supplementary table 6: Incidence rate of childhood maltreatment per age group .....</b>                       | <b>13</b> |
| <b>Supplementary table 7: Incidence rate of childhood maltreatment per deprivation quintile .....</b>            | <b>14</b> |
| <b>Supplementary table 8: Incidence rate of childhood maltreatment per ethnic group .....</b>                    | <b>15</b> |
| <b>Supplementary table 9: Prevalence of childhood maltreatment: 1996-2017 .....</b>                              | <b>16</b> |
| <b>Supplementary table 10: Regression model describing the risk of experiencing childhood maltreatment.....</b>  | <b>17</b> |
| <b>Supplementary table 11: Annual incidence rate of domestic abuse between 1996-2017 .....</b>                   | <b>18</b> |
| <b>Supplementary table 12: Incidence rate of domestic abuse per age group.....</b>                               | <b>19</b> |
| <b>Supplementary table 13: Incidence rate of domestic abuse per deprivation quintile .....</b>                   | <b>20</b> |
| <b>Supplementary table 14: Incidence rate of domestic abuse per ethnic group .....</b>                           | <b>21</b> |
| <b>Supplementary table 15: Prevalence of domestic abuse between 1996-2017.....</b>                               | <b>22</b> |
| <b>Supplementary table 16: Regression model describing the risk of experiencing domestic abuse in women.....</b> | <b>23</b> |

## Read code lists

### Childhood maltreatment- Incident only codes

| Code    | Description                                                  |
|---------|--------------------------------------------------------------|
| 13lh.00 | Subject to supervision order under Children Act 1989         |
| 13li.00 | Child deserted by parents                                    |
| 13li.00 | Subject to care order under Children Act 1989                |
| 13li.11 | Child deserted by mother                                     |
| 13li000 | Subject to care order under section 20 of Children Act 1989  |
| 13li100 | Subject to care order under section 21 of Children Act 1989  |
| 13li200 | Subject to care order under section 25 of Children Act 1989  |
| 13li300 | Subject to care order under section 31 of Children Act 1989  |
| 13lj.00 | Subject to interim care order under Children Act 1989        |
| 13lj000 | Sub to interim care order under section 38 Children Act 1989 |
| 13lj100 | Emergency protective order section 44 Children Act 1989      |
| 13W3.00 | Child abuse in family                                        |
| 13W4.00 | Parent/child conflict                                        |
| 13W4000 | Child/parent violence                                        |
| 13WT.00 | Child protection observation                                 |
| 13WT000 | Child protection category                                    |
| 13WT100 | Child protection category emotional                          |
| 13WT200 | Child protection category physical                           |
| 13WT300 | Child protection category sexual                             |
| 13WT400 | Child protection category neglect                            |
| 14X5.00 | Victim of physical abuse                                     |
| 14X6.00 | Victim of sexual abuse                                       |
| 14X6000 | Victim of sexual harassment                                  |
| 14X7.00 | Victim of emotional abuse                                    |
| 14X8.00 | Victim of domestic violence                                  |
| 14XF.00 | Victim of human trafficking                                  |
| 14XG.00 | Victim of domestic abuse                                     |
| 14XH.00 | Victim of child sexual exploitation                          |
| 14XJ.00 | Victim of psychological abuse                                |
| 14XK.00 | Victim of financial abuse                                    |
| 14XP.00 | Victim of discriminatory abuse                               |

|    |         |                                                              |
|----|---------|--------------------------------------------------------------|
| 1  | 14XR.00 | Victim neglect & acts omission                               |
| 2  | 222R.00 | Neglected appearance                                         |
| 3  | R037.00 | [D]Insufficient intake of food and water due to self neglect |
| 4  | R2y3.11 | [D] Self neglect                                             |
| 5  | Ry18.00 | [D]Self neglect                                              |
| 6  | SN42000 | Deprivation of food, unspecified                             |
| 7  | SN43000 | Deprivation of water                                         |
| 8  | SN55.00 | Child maltreatment syndrome                                  |
| 9  | SN55000 | Emotional maltreatment of child                              |
| 10 | SN55011 | Emotional deprivation of child                               |
| 11 | SN55012 | Emotional abuse of child                                     |
| 12 | SN55100 | Nutritional maltreatment of child                            |
| 13 | SN55111 | Nutritional deprivation of child                             |
| 14 | SN55112 | Malnutrition in child maltreatment syndrome                  |
| 15 | SN55200 | Non-accidental injury to child                               |
| 16 | SN55211 | NAI - non-accidental injury to child                         |
| 17 | SN55212 | Physical injury to child                                     |
| 18 | SN55300 | Battered baby or child syndrome NOS                          |
| 19 | SN55311 | Battered baby syndrome NOS                                   |
| 20 | SN55312 | Battered child syndrome NOS                                  |
| 21 | SN55400 | Multiple deprivation of child                                |
| 22 | SN55500 | Physical abuse of child                                      |
| 23 | SN55600 | Non-accidental traumatic head injury to child                |
| 24 | SN55z00 | Child maltreatment syndrome NOS                              |
| 25 | SN55z11 | Child abuse NEC                                              |
| 26 | SN55z12 | Child deprivation syndrome                                   |
| 27 | SN55z13 | Neglect affecting child NEC                                  |
| 28 | SN56000 | Battered person unspecified, syndrome                        |
| 29 | SN57.00 | Maltreatment syndromes                                       |
| 30 | SN57000 | Neglect or abandonment                                       |
| 31 | SN57100 | Sexual abuse                                                 |
| 32 | SN57200 | Child affected by Munchausen's by proxy                      |
| 33 | SyuH500 | [X]Other maltreatment syndromes                              |
| 34 | TE40.00 | Accidents due to abandonment or neglect of helpless person   |
| 35 | TL7..00 | Child battering and other maltreatment                       |
| 36 | TL70.00 | Child battering or other maltreatment by parent              |
| 37 | TL7y.00 | Child battering or other maltreatment by other spec person   |
| 38 | TL7z.00 | Child battering or other maltreatment by person NOS          |
| 39 | TLx4.00 | Assault by criminal neglect                                  |
| 40 | U3M..00 | [X]Neglect and abandonment                                   |
| 41 | U3M0.00 | [X]Neglect and abandonment, by spouse or partner             |
| 42 | U3M1.00 | [X]Neglect and abandonment, by parent                        |
| 43 | U3M2.00 | [X]Neglect and abandonment, by acquaintance or friend        |
| 44 | U3My.00 | [X]Neglect and abandonment, by other specified persons       |
| 45 | U3Mz.00 | [X]Neglect and abandonment, by unspecified person            |

|         |                                                             |
|---------|-------------------------------------------------------------|
| U3N..00 | [X]Other maltreatment syndromes                             |
| U3N0.00 | [X]Other maltreatment syndromes, by spouse or partner       |
| U3N1.00 | [X]Other maltreatment syndromes, by parent                  |
| U3N2.00 | [X]Other maltreatment syndromes, by acquaintance or friend  |
| U3N3.00 | [X]Other maltreatment syndromes, by official authorities    |
| U3Ny.00 | [X]Other maltreatment syndromes, by other specified persons |
| U3Nz.00 | [X]Other maltreatment syndromes, by unspecified person      |
| U3P..00 | [X]Maltreatment                                             |
| U3P0.00 | [X]Maltreatment, by spouse or partner                       |
| U3P1.00 | [X]Maltreatment, by parent                                  |
| U3P2.00 | [X]Maltreatment, by acquaintance or friend                  |
| Z352.11 | Child abuse investigation                                   |
| Z787.00 | Self-neglect                                                |
| Z787200 | Neglect of clothes                                          |
| Z787400 | Neglect of personal hygiene                                 |
| Z787500 | Neglect of physical health                                  |
| Z787600 | Neglect of dental care                                      |
| Z787700 | Neglect of physical illness                                 |
| Z787800 | Neglect of common dangers                                   |
| ZV1B400 | [V]Personal history of neglect                              |
| ZV4H300 | [V]Emotional neglect of child                               |
| ZV4H400 | [V]Other problems related to neglect in upbringing          |
| ZV61200 | [V]Child abuse                                              |
| ZV61211 | [V]Child battering                                          |
| ZV61212 | [V]Child neglect                                            |
| ZV61213 | [V]Parent - child conflict                                  |
| ZVu4B00 | [X]Other problems related to neglect in upbringing          |

### Childhood maltreatment- Prevalent codes

| Code    | Description                                                  |
|---------|--------------------------------------------------------------|
| 6254.00 | A/N care: H/O child abuse                                    |
| 13lh.00 | Subject to supervision order under Children Act 1989         |
| 13li.00 | Child deserted by parents                                    |
| 13li.00 | Subject to care order under Children Act 1989                |
| 13li.11 | Child deserted by mother                                     |
| 13li000 | Subject to care order under section 20 of Children Act 1989  |
| 13li100 | Subject to care order under section 21 of Children Act 1989  |
| 13li200 | Subject to care order under section 25 of Children Act 1989  |
| 13li300 | Subject to care order under section 31 of Children Act 1989  |
| 13lj.00 | Subject to interim care order under Children Act 1989        |
| 13lj000 | Sub to interim care order under section 38 Children Act 1989 |
| 13lj100 | Emergency protective order section 44 Children Act 1989      |
| 13W3.00 | Child abuse in family                                        |
| 13W4.00 | Parent/child conflict                                        |

|    |         |                                                              |
|----|---------|--------------------------------------------------------------|
| 1  | 13W4000 | Child/parent violence                                        |
| 2  | 13WT.00 | Child protection observation                                 |
| 3  | 13WT000 | Child protection category                                    |
| 4  | 13WT100 | Child protection category emotional                          |
| 5  | 13WT200 | Child protection category physical                           |
| 6  | 13WT300 | Child protection category sexual                             |
| 7  | 13WT400 | Child protection category neglect                            |
| 8  | 14X..00 | History of abuse                                             |
| 9  | 14X0.00 | History of physical abuse                                    |
| 10 | 14X1.00 | History of sexual abuse                                      |
| 11 | 14X2.00 | History of emotional abuse                                   |
| 12 | 14X3.00 | History of domestic violence                                 |
| 13 | 14X5.00 | Victim of physical abuse                                     |
| 14 | 14X6.00 | Victim of sexual abuse                                       |
| 15 | 14X6000 | Victim of sexual harassment                                  |
| 16 | 14X7.00 | Victim of emotional abuse                                    |
| 17 | 14X8.00 | Victim of domestic violence                                  |
| 18 | 14XD.00 | History of domestic abuse                                    |
| 19 | 14XD000 | H/O domestic emotional abuse                                 |
| 20 | 14XD100 | H/O domestic physical abuse                                  |
| 21 | 14XD200 | H/O domestic sexual abuse                                    |
| 22 | 14XE.00 | History of being victim of domestic violence                 |
| 23 | 14XF.00 | Victim of human trafficking                                  |
| 24 | 14XG.00 | Victim of domestic abuse                                     |
| 25 | 14XH.00 | Victim of child sexual exploitation                          |
| 26 | 14XJ.00 | Victim of psychological abuse                                |
| 27 | 14XK.00 | Victim of financial abuse                                    |
| 28 | 14XP.00 | Victim of discriminatory abuse                               |
| 29 | 14XR.00 | Victim neglect & acts omission                               |
| 30 | 222R.00 | Neglected appearance                                         |
| 31 | R037.00 | [D]Insufficient intake of food and water due to self neglect |
| 32 | R2y3.11 | [D] Self neglect                                             |
| 33 | Ry18.00 | [D]Self neglect                                              |
| 34 | SN42000 | Deprivation of food, unspecified                             |
| 35 | SN43000 | Deprivation of water                                         |
| 36 | SN55.00 | Child maltreatment syndrome                                  |
| 37 | SN55000 | Emotional maltreatment of child                              |
| 38 | SN55011 | Emotional deprivation of child                               |
| 39 | SN55012 | Emotional abuse of child                                     |
| 40 | SN55100 | Nutritional maltreatment of child                            |
| 41 | SN55111 | Nutritional deprivation of child                             |
| 42 | SN55112 | Malnutrition in child maltreatment syndrome                  |
| 43 | SN55200 | Non-accidental injury to child                               |
| 44 | SN55211 | NAI - non-accidental injury to child                         |
| 45 | SN55212 | Physical injury to child                                     |

|    |         |                                                             |
|----|---------|-------------------------------------------------------------|
| 1  | SN55300 | Battered baby or child syndrome NOS                         |
| 2  | SN55311 | Battered baby syndrome NOS                                  |
| 3  | SN55312 | Battered child syndrome NOS                                 |
| 4  | SN55400 | Multiple deprivation of child                               |
| 5  | SN55500 | Physical abuse of child                                     |
| 6  | SN55600 | Non-accidental traumatic head injury to child               |
| 7  | SN55z00 | Child maltreatment syndrome NOS                             |
| 8  | SN55z11 | Child abuse NEC                                             |
| 9  | SN55z12 | Child deprivation syndrome                                  |
| 10 | SN55z13 | Neglect affecting child NEC                                 |
| 11 | SN56000 | Battered person unspecified, syndrome                       |
| 12 | SN57.00 | Maltreatment syndromes                                      |
| 13 | SN57000 | Neglect or abandonment                                      |
| 14 | SN57100 | Sexual abuse                                                |
| 15 | SN57200 | Child affected by Munchausen's by proxy                     |
| 16 | SyuH500 | [X]Other maltreatment syndromes                             |
| 17 | TE40.00 | Accidents due to abandonment or neglect of helpless person  |
| 18 | TL7..00 | Child battering and other maltreatment                      |
| 19 | TL70.00 | Child battering or other maltreatment by parent             |
| 20 | TL7y.00 | Child battering or other maltreatment by other spec person  |
| 21 | TL7z.00 | Child battering or other maltreatment by person NOS         |
| 22 | TLx4.00 | Assault by criminal neglect                                 |
| 23 | U3M..00 | [X]Neglect and abandonment                                  |
| 24 | U3M0.00 | [X]Neglect and abandonment, by spouse or partner            |
| 25 | U3M1.00 | [X]Neglect and abandonment, by parent                       |
| 26 | U3M2.00 | [X]Neglect and abandonment, by acquaintance or friend       |
| 27 | U3My.00 | [X]Neglect and abandonment, by other specified persons      |
| 28 | U3Mz.00 | [X]Neglect and abandonment, by unspecified person           |
| 29 | U3N..00 | [X]Other maltreatment syndromes                             |
| 30 | U3N0.00 | [X]Other maltreatment syndromes, by spouse or partner       |
| 31 | U3N1.00 | [X]Other maltreatment syndromes, by parent                  |
| 32 | U3N2.00 | [X]Other maltreatment syndromes, by acquaintance or friend  |
| 33 | U3N3.00 | [X]Other maltreatment syndromes, by official authorities    |
| 34 | U3Ny.00 | [X]Other maltreatment syndromes, by other specified persons |
| 35 | U3Nz.00 | [X]Other maltreatment syndromes, by unspecified person      |
| 36 | U3P..00 | [X]Maltreatment                                             |
| 37 | U3P0.00 | [X]Maltreatment, by spouse or partner                       |
| 38 | U3P1.00 | [X]Maltreatment, by parent                                  |
| 39 | U3P2.00 | [X]Maltreatment, by acquaintance or friend                  |
| 40 | Z352.11 | Child abuse investigation                                   |
| 41 | Z787.00 | Self-neglect                                                |
| 42 | Z787200 | Neglect of clothes                                          |
| 43 | Z787400 | Neglect of personal hygiene                                 |
| 44 | Z787500 | Neglect of physical health                                  |
| 45 | Z787600 | Neglect of dental care                                      |

|    |         |                                                    |
|----|---------|----------------------------------------------------|
| 1  | Z787700 | Neglect of physical illness                        |
| 2  | Z787800 | Neglect of common dangers                          |
| 3  | ZV1B400 | [V]Personal history of neglect                     |
| 4  | ZV4H300 | [V]Emotional neglect of child                      |
| 5  | ZV4H400 | [V]Other problems related to neglect in upbringing |
| 6  | ZV61200 | [V]Child abuse                                     |
| 7  | ZV61211 | [V]Child battering                                 |
| 8  | ZV61212 | [V]Child neglect                                   |
| 9  | ZV61213 | [V]Parent - child conflict                         |
| 10 | ZVu4B00 | [X]Other problems related to neglect in upbringing |

### Domestic abuse- Incident only codes

| Code    | Description                 |
|---------|-----------------------------|
| 14X8.00 | Victim of domestic violence |
| 14XG.00 | Victim of domestic abuse    |

### Domestic abuse- Prevalent codes

| Code    | Description                                  |
|---------|----------------------------------------------|
| 14X3.00 | History of domestic violence                 |
| 14X8.00 | Victim of domestic violence                  |
| 14XD.00 | History of domestic abuse                    |
| 14XD000 | H/O domestic emotional abuse                 |
| 14XD100 | H/O domestic physical abuse                  |
| 14XD200 | H/O domestic sexual abuse                    |
| 14XE.00 | History of being victim of domestic violence |
| 14XG.00 | Victim of domestic abuse                     |

Supplementary table 1: Annual incidence rate of domestic abuse in men between 2005-2017

| Year | New cases (Numerator) | Person years at risk (Denominator) | Incidence rate per 100,000 | Lower confidence interval | Upper confidence interval |
|------|-----------------------|------------------------------------|----------------------------|---------------------------|---------------------------|
| 2005 | 0                     | 1636719                            | 0.00                       | 0.00                      | 0.00                      |
| 2006 | 9                     | 1734689                            | 0.52                       | 0.18                      | 0.86                      |
| 2007 | 13                    | 1806891                            | 0.72                       | 0.33                      | 1.11                      |
| 2008 | 17                    | 1906963                            | 0.89                       | 0.47                      | 1.32                      |
| 2009 | 38                    | 1994312                            | 1.91                       | 1.30                      | 2.51                      |
| 2010 | 16                    | 1983802                            | 0.81                       | 0.41                      | 1.20                      |
| 2011 | 27                    | 1998716                            | 1.35                       | 0.84                      | 1.86                      |
| 2012 | 26                    | 2059505                            | 1.26                       | 0.78                      | 1.75                      |
| 2013 | 30                    | 2009399                            | 1.49                       | 0.96                      | 2.03                      |
| 2014 | 53                    | 1891262                            | 2.80                       | 2.05                      | 3.56                      |
| 2015 | 29                    | 1671621                            | 1.73                       | 1.10                      | 2.37                      |
| 2016 | 38                    | 1433446                            | 2.65                       | 1.81                      | 3.49                      |
| 2017 | 26                    | 1272745                            | 2.04                       | 1.26                      | 2.83                      |



Supplementary table 2: Prevalence of domestic abuse in men between 2005-2017

| Year | Cases (numerator) | Denominator (total population) | Prevalence per 100,000 | Lower confidence interval | Upper confidence interval |
|------|-------------------|--------------------------------|------------------------|---------------------------|---------------------------|
| 2005 | 27                | 1560540                        | 1.73                   | 1.08                      | 2.38                      |
| 2006 | 30                | 1715061                        | 1.75                   | 1.12                      | 2.38                      |
| 2007 | 48                | 1791798                        | 2.68                   | 1.92                      | 3.44                      |
| 2008 | 80                | 1861532                        | 4.30                   | 3.36                      | 5.24                      |
| 2009 | 123               | 1986921                        | 6.19                   | 5.10                      | 7.28                      |
| 2010 | 207               | 2009811                        | 10.30                  | 8.90                      | 11.70                     |
| 2011 | 251               | 1998732                        | 12.56                  | 11.00                     | 14.11                     |
| 2012 | 327               | 2030437                        | 16.10                  | 14.36                     | 17.85                     |
| 2013 | 431               | 2071595                        | 20.81                  | 18.84                     | 22.77                     |
| 2014 | 499               | 1948992                        | 25.60                  | 23.36                     | 27.85                     |
| 2015 | 565               | 1816180                        | 31.11                  | 28.54                     | 33.67                     |
| 2016 | 425               | 1518731                        | 27.98                  | 25.32                     | 30.64                     |
| 2017 | 444               | 1365746                        | 32.51                  | 29.49                     | 35.53                     |

Supplementary table 3: Annual incidence rate of childhood maltreatment between 1996-2017

| Year | New cases (Numerator) | Person years at risk (Denominator) | Incidence rate per 100,000 | Lower confidence interval | Upper confidence interval |
|------|-----------------------|------------------------------------|----------------------------|---------------------------|---------------------------|
| 1996 | 3                     | 8818.982                           | 34.02                      | -4.47                     | 72.51                     |
| 1997 | 17                    | 75578.7                            | 22.49                      | 11.80                     | 33.18                     |
| 1998 | 35                    | 166631.5                           | 21.00                      | 14.05                     | 27.96                     |
| 1999 | 47                    | 235954.6                           | 19.92                      | 14.23                     | 25.61                     |
| 2000 | 67                    | 308085.1                           | 21.75                      | 16.54                     | 26.95                     |
| 2001 | 76                    | 450754.2                           | 16.86                      | 13.07                     | 20.65                     |
| 2002 | 90                    | 575967.3                           | 15.63                      | 12.40                     | 18.85                     |
| 2003 | 94                    | 695178.8                           | 13.52                      | 10.79                     | 16.25                     |
| 2004 | 142                   | 747512.6                           | 19.00                      | 15.87                     | 22.12                     |
| 2005 | 99                    | 825747.7                           | 11.99                      | 9.63                      | 14.35                     |
| 2006 | 140                   | 876234.6                           | 15.98                      | 13.33                     | 18.62                     |
| 2007 | 106                   | 914492.9                           | 11.59                      | 9.38                      | 13.80                     |
| 2008 | 142                   | 966390.4                           | 14.69                      | 12.28                     | 17.11                     |
| 2009 | 175                   | 1014605                            | 17.25                      | 14.69                     | 19.80                     |
| 2010 | 192                   | 1013900                            | 18.94                      | 16.26                     | 21.61                     |
| 2011 | 237                   | 1032857                            | 22.95                      | 20.03                     | 25.87                     |
| 2012 | 322                   | 1071219                            | 30.06                      | 26.78                     | 33.34                     |
| 2013 | 551                   | 1053495                            | 52.30                      | 47.94                     | 56.67                     |
| 2014 | 560                   | 992752.1                           | 56.41                      | 51.74                     | 61.08                     |
| 2015 | 503                   | 880922.4                           | 57.10                      | 52.11                     | 62.09                     |
| 2016 | 463                   | 757597.2                           | 61.11                      | 55.55                     | 66.68                     |
| 2017 | 403                   | 670155.5                           | 60.14                      | 54.27                     | 66.01                     |

Supplementary table 4: Incidence rate of childhood maltreatment in females between 1996-2017

| <b>Female</b> |                          |                                          |                                  |                                 |                                 |
|---------------|--------------------------|------------------------------------------|----------------------------------|---------------------------------|---------------------------------|
| Year          | New cases<br>(Numerator) | Person years at<br>risk<br>(Denominator) | Incidence<br>rate per<br>100,000 | Lower<br>confidence<br>interval | Upper<br>confidence<br>interval |
| 1996          | 2                        | 4110.859                                 | 48.65                            | -18.76                          | 116.07                          |
| 1997          | 14                       | 34754.82                                 | 40.28                            | 19.18                           | 61.38                           |
| 1998          | 19                       | 77101.73                                 | 24.64                            | 13.56                           | 35.72                           |
| 1999          | 29                       | 109675.7                                 | 26.44                            | 16.82                           | 36.06                           |
| 2000          | 41                       | 143745.1                                 | 28.52                            | 19.79                           | 37.25                           |
| 2001          | 47                       | 210921.2                                 | 22.28                            | 15.91                           | 28.65                           |
| 2002          | 62                       | 271017.4                                 | 22.88                            | 17.18                           | 28.57                           |
| 2003          | 53                       | 328723.9                                 | 16.12                            | 11.78                           | 20.46                           |
| 2004          | 78                       | 354401.6                                 | 22.01                            | 17.13                           | 26.89                           |
| 2005          | 62                       | 392607.8                                 | 15.79                            | 11.86                           | 19.72                           |
| 2006          | 88                       | 417941.8                                 | 21.06                            | 16.66                           | 25.45                           |
| 2007          | 67                       | 437464.5                                 | 15.32                            | 11.65                           | 18.98                           |
| 2008          | 78                       | 463663.1                                 | 16.82                            | 13.09                           | 20.56                           |
| 2009          | 113                      | 488113.5                                 | 23.15                            | 18.88                           | 27.42                           |
| 2010          | 112                      | 489196.9                                 | 22.89                            | 18.66                           | 27.13                           |
| 2011          | 123                      | 499857.8                                 | 24.61                            | 20.26                           | 28.95                           |
| 2012          | 171                      | 519861.3                                 | 32.89                            | 27.96                           | 37.82                           |
| 2013          | 301                      | 511966                                   | 58.79                            | 52.15                           | 65.43                           |
| 2014          | 315                      | 483076.8                                 | 65.21                            | 58.01                           | 72.41                           |
| 2015          | 250                      | 429453.4                                 | 58.21                            | 51.00                           | 65.43                           |
| 2016          | 239                      | 369898                                   | 64.61                            | 56.42                           | 72.80                           |
| 2017          | 217                      | 327614.6                                 | 66.24                            | 57.42                           | 75.05                           |

Supplementary table 5: Incidence rate of childhood maltreatment in males between 1996-2017

| <b>Male</b> |                       |                                    |                            |                           |                           |
|-------------|-----------------------|------------------------------------|----------------------------|---------------------------|---------------------------|
| Year        | New cases (Numerator) | Person years at risk (Denominator) | Incidence rate per 100,000 | Lower confidence interval | Upper confidence interval |
| 1996        | 1                     | 4708.124                           | 21.24                      | -20.38                    | 62.86                     |
| 1997        | 3                     | 40823.88                           | 7.35                       | -0.97                     | 15.66                     |
| 1998        | 16                    | 89529.8                            | 17.87                      | 9.12                      | 26.63                     |
| 1999        | 18                    | 126278.8                           | 14.25                      | 7.67                      | 20.84                     |
| 2000        | 26                    | 164340                             | 15.82                      | 9.74                      | 21.90                     |
| 2001        | 29                    | 239833                             | 12.09                      | 7.69                      | 16.49                     |
| 2002        | 28                    | 304949.9                           | 9.18                       | 5.78                      | 12.58                     |
| 2003        | 41                    | 366454.9                           | 11.19                      | 7.76                      | 14.61                     |
| 2004        | 64                    | 393111                             | 16.28                      | 12.29                     | 20.27                     |
| 2005        | 37                    | 433139.9                           | 8.54                       | 5.79                      | 11.29                     |
| 2006        | 52                    | 458292.7                           | 11.35                      | 8.26                      | 14.43                     |
| 2007        | 39                    | 477028.4                           | 8.18                       | 5.61                      | 10.74                     |
| 2008        | 64                    | 502727.3                           | 12.73                      | 9.61                      | 15.85                     |
| 2009        | 62                    | 526491.6                           | 11.78                      | 8.85                      | 14.71                     |
| 2010        | 80                    | 524703.3                           | 15.25                      | 11.91                     | 18.59                     |
| 2011        | 114                   | 532999.4                           | 21.39                      | 17.46                     | 25.31                     |
| 2012        | 151                   | 551357.7                           | 27.39                      | 23.02                     | 31.75                     |
| 2013        | 250                   | 541528.6                           | 46.17                      | 40.44                     | 51.89                     |
| 2014        | 245                   | 509675.2                           | 48.07                      | 42.05                     | 54.09                     |
| 2015        | 253                   | 451469                             | 56.04                      | 49.14                     | 62.94                     |
| 2016        | 224                   | 387699.2                           | 57.78                      | 50.21                     | 65.34                     |
| 2017        | 186                   | 342540.9                           | 54.30                      | 46.50                     | 62.10                     |

## Supplementary table 6: Incidence rate of childhood maltreatment per age group

| Age group   | New cases (Numerator) | Person years at risk (Denominator) | Incidence rate per 100,000 | Lower confidence interval | Upper confidence interval |
|-------------|-----------------------|------------------------------------|----------------------------|---------------------------|---------------------------|
| 0-1 years   | 423                   | 802550                             | 52.71                      | 47.92                     | 57.98                     |
| 1-4 years   | 1244                  | 3584000                            | 34.71                      | 32.83                     | 36.69                     |
| 5-9 years   | 1185                  | 4373600                            | 27.09                      | 25.60                     | 28.68                     |
| 10-15 years | 1289                  | 5026870                            | 25.64                      | 24.28                     | 27.08                     |
| 16-17 years | 342                   | 1616180                            | 21.16                      | 19.03                     | 23.53                     |

For peer review only

Supplementary table 7: Incidence rate of childhood maltreatment per deprivation quintile

| Townsend deprivation quintile | New cases (Numerator) | Person years at risk (Denominator) | Incidence rate per 100,000 | Lower confidence interval | Upper confidence interval |
|-------------------------------|-----------------------|------------------------------------|----------------------------|---------------------------|---------------------------|
| 1                             | 370                   | 3977881                            | 9.30                       | 8.35                      | 10.25                     |
| 2                             | 403                   | 3367785                            | 11.97                      | 10.80                     | 13.13                     |
| 3                             | 711                   | 3556979                            | 19.99                      | 18.52                     | 21.46                     |
| 4                             | 1057                  | 3295050                            | 32.08                      | 30.14                     | 34.01                     |
| 5                             | 1241                  | 2541212                            | 48.83                      | 46.12                     | 51.55                     |

For peer review only

## Supplementary table 8: Incidence rate of childhood maltreatment per ethnic group

| Ethnicity   | New cases (Numerator) | Person years at risk (Denominator) | Incidence rate per 100,000 | Lower confidence interval | Upper confidence interval |
|-------------|-----------------------|------------------------------------|----------------------------|---------------------------|---------------------------|
| White       | 1802                  | 6497060                            | 27.74                      | 26.46                     | 29.02                     |
| Mixed       | 26                    | 119173.4                           | 21.82                      | 13.43                     | 30.20                     |
| Other       | 76                    | 158165.8                           | 48.05                      | 37.25                     | 58.85                     |
| Black       | 130                   | 288266.2                           | 45.10                      | 37.35                     | 52.85                     |
| South Asian | 143                   | 411692.6                           | 34.73                      | 29.04                     | 40.43                     |

Supplementary table 9: Prevalence of childhood maltreatment: 1996-2017

| Year | Cases (numerator) | Denominator (total population) | Prevalence per 100,000 | Lower confidence interval | Upper confidence interval |
|------|-------------------|--------------------------------|------------------------|---------------------------|---------------------------|
| 1996 | 4                 | 1650                           | 242.42                 | 5.18                      | 479.67                    |
| 1997 | 63                | 35734                          | 176.30                 | 132.81                    | 219.79                    |
| 1998 | 300               | 137636                         | 217.97                 | 193.33                    | 242.60                    |
| 1999 | 469               | 215811                         | 217.32                 | 197.68                    | 236.96                    |
| 2000 | 612               | 274138                         | 223.25                 | 205.58                    | 240.91                    |
| 2001 | 901               | 420664                         | 214.19                 | 200.22                    | 228.15                    |
| 2002 | 1052              | 516432                         | 203.71                 | 191.41                    | 216.00                    |
| 2003 | 1290              | 653780                         | 197.31                 | 186.56                    | 208.07                    |
| 2004 | 1378              | 725049                         | 190.06                 | 180.03                    | 200.08                    |
| 2005 | 1582              | 785056                         | 201.51                 | 191.60                    | 211.43                    |
| 2006 | 1742              | 866447                         | 201.05                 | 191.62                    | 210.48                    |
| 2007 | 1741              | 905158                         | 192.34                 | 183.32                    | 201.37                    |
| 2008 | 1828              | 941016                         | 194.26                 | 185.36                    | 203.15                    |
| 2009 | 2015              | 1007729                        | 199.95                 | 191.23                    | 208.67                    |
| 2010 | 2152              | 1024011                        | 210.15                 | 201.29                    | 219.02                    |
| 2011 | 2231              | 1026713                        | 217.30                 | 208.29                    | 226.30                    |
| 2012 | 2544              | 1053725                        | 241.43                 | 232.06                    | 250.80                    |
| 2013 | 2914              | 1081001                        | 269.57                 | 259.79                    | 279.34                    |
| 2014 | 3253              | 1021024                        | 318.60                 | 307.67                    | 329.53                    |
| 2015 | 3487              | 957937                         | 364.01                 | 351.95                    | 376.07                    |
| 2016 | 3076              | 800060                         | 384.47                 | 370.91                    | 398.03                    |
| 2017 | 3009              | 723126                         | 416.11                 | 401.28                    | 430.94                    |



Supplementary table 10: Regression model describing the risk of experiencing childhood maltreatment

| Incidence of childhood maltreatment |                                         |         |
|-------------------------------------|-----------------------------------------|---------|
|                                     | Adjusted* incidence rate ratio (95% CI) | P value |
| <b>Sex</b>                          |                                         |         |
| Male                                | 1 (ref)                                 |         |
| Female                              | 1.35 (1.28-1.44)                        | <0.001  |
| <b>Age at cohort entry</b>          |                                         |         |
| 0-1 years                           | 1 (ref)                                 |         |
| 1-4 years                           | 0.96 (0.89-1.03)                        | 0.264   |
| 5-9 years                           | 0.67 (0.61-0.72)                        | <0.001  |
| 10-15 years                         | 0.47 (0.43-0.51)                        | <0.001  |
| 16-17 years                         | 0.23 (0.19-0.28)                        | <0.001  |
| <b>Ethnicity</b>                    |                                         |         |
| White                               | 1 (ref)                                 |         |
| Mixed race                          | 0.72 (0.49-1.07)                        | 0.102   |
| Black                               | 1.25 (1.04-1.49)                        | 0.015   |
| South Asian                         | 1.06 (0.89-1.26)                        | 0.512   |
| Others                              | 1.45 (1.15-1.82)                        | 0.002   |
| Missing                             | 0.78 (0.73-0.83)                        | <0.001  |
| <b>Townsend Deprivation Index</b>   |                                         |         |
| 1 (Least deprived)                  | 1 (ref)                                 |         |
| 2                                   | 1.29 (1.12-1.48)                        | <0.001  |
| 3                                   | 2.13 (1.88-2.42)                        | <0.001  |
| 4                                   | 3.41 (3.02-3.84)                        | <0.001  |
| 5 (Most deprived)                   | 5.14 (4.57-5.77)                        | <0.001  |
| Missing                             | 2.67 (2.35-3.03)                        | <0.001  |

\*Adjusted for other demographic factors within the table

Supplementary table 11: Annual incidence rate of domestic abuse between 1996-2017

| Year | New cases (Numerator) | Person years at risk (Denominator) | Incidence rate per 100,000 | Lower confidence interval | Upper confidence interval |
|------|-----------------------|------------------------------------|----------------------------|---------------------------|---------------------------|
| 1996 | 0                     | 19347.05                           | -                          | -                         | -                         |
| 1997 | 0                     | 166965.5                           | -                          | -                         | -                         |
| 1998 | 0                     | 370905.7                           | -                          | -                         | -                         |
| 1999 | 1                     | 522522.3                           | 0.19                       | -0.18                     | 0.57                      |
| 2000 | 0                     | 669896.3                           | -                          | -                         | -                         |
| 2001 | 1                     | 963631.1                           | 0.10                       | -0.10                     | 0.31                      |
| 2002 | 0                     | 1216535                            | -                          | -                         | -                         |
| 2003 | 0                     | 1447347                            | -                          | -                         | -                         |
| 2004 | 3                     | 1543475                            | 0.19                       | -0.03                     | 0.41                      |
| 2005 | 5                     | 1690775                            | 0.30                       | 0.04                      | 0.55                      |
| 2006 | 220                   | 1788113                            | 12.30                      | 10.68                     | 13.93                     |
| 2007 | 328                   | 1860393                            | 17.63                      | 15.72                     | 19.54                     |
| 2008 | 347                   | 1964404                            | 17.66                      | 15.81                     | 19.52                     |
| 2009 | 477                   | 2054123                            | 23.22                      | 21.14                     | 25.31                     |
| 2010 | 455                   | 2043540                            | 22.27                      | 20.22                     | 24.31                     |
| 2011 | 441                   | 2066927                            | 21.34                      | 19.35                     | 23.33                     |
| 2012 | 461                   | 2131583                            | 21.63                      | 19.65                     | 23.60                     |
| 2013 | 558                   | 2082465                            | 26.80                      | 24.57                     | 29.02                     |
| 2014 | 702                   | 1960191                            | 35.81                      | 33.16                     | 38.46                     |
| 2015 | 444                   | 1731272                            | 25.65                      | 23.26                     | 28.03                     |
| 2016 | 467                   | 1482673                            | 31.50                      | 28.64                     | 34.35                     |
| 2017 | 453                   | 1311287                            | 34.55                      | 31.37                     | 37.73                     |

## Supplementary table 12: Incidence rate of domestic abuse per age group

| Age Group | New cases (Numerator) | Person years at risk (Denominator) | Incidence rate per 100,000 | Lower confidence interval | Upper confidence interval |
|-----------|-----------------------|------------------------------------|----------------------------|---------------------------|---------------------------|
| 18-25     | 1185                  | 3592040                            | 32.99                      | 31.16                     | 34.92                     |
| 25-35     | 1780                  | 5277210                            | 33.73                      | 32.20                     | 35.33                     |
| 35-45     | 1406                  | 5668310                            | 24.80                      | 23.54                     | 26.14                     |
| 45-55     | 627                   | 5317300                            | 11.79                      | 10.90                     | 12.75                     |
| 55-65     | 233                   | 4524270                            | 5.15                       | 4.53                      | 5.86                      |
| 65+       | 145                   | 6847960                            | 2.12                       | 1.80                      | 2.49                      |

## Supplementary table 13: Incidence rate of domestic abuse per deprivation quintile

| Townsend deprivation quintile | New cases (Numerator) | Person years at risk (Denominator) | Incidence rate per 100,000 | Lower confidence interval | Upper confidence interval |
|-------------------------------|-----------------------|------------------------------------|----------------------------|---------------------------|---------------------------|
| 1                             | 600                   | 6770554                            | 8.86                       | 8.15                      | 9.57                      |
| 2                             | 645                   | 5941074                            | 10.86                      | 10.02                     | 11.69                     |
| 3                             | 912                   | 5803875                            | 15.71                      | 14.69                     | 16.73                     |
| 4                             | 1162                  | 5046996                            | 23.02                      | 21.70                     | 24.35                     |
| 5                             | 1269                  | 3496615                            | 36.29                      | 34.30                     | 38.29                     |

## Supplementary table 14: Incidence rate of domestic abuse per ethnic group

| Ethnic group | New cases (Numerator) | Person years at risk (Denominator) | Incidence rate per 100,000 | Lower confidence interval | Upper confidence interval |
|--------------|-----------------------|------------------------------------|----------------------------|---------------------------|---------------------------|
| White        | 2771                  | 12900000                           | 21.46                      | 20.66                     | 22.26                     |
| Mixed        | 94                    | 255581.1                           | 36.78                      | 29.35                     | 44.21                     |
| Other        | 80                    | 108769.6                           | 73.55                      | 57.44                     | 89.66                     |
| Black        | 204                   | 370777.9                           | 55.02                      | 47.47                     | 62.57                     |
| South Asian  | 356                   | 544591.4                           | 65.37                      | 58.58                     | 72.16                     |

Supplementary table 15: Prevalence of domestic abuse between 1996-2017

| Year | Cases (numerator) | Denominator (total population) | Prevalence per 100,000 | Lower confidence interval | Upper confidence interval |
|------|-------------------|--------------------------------|------------------------|---------------------------|---------------------------|
| 1996 | 0                 | 3791                           | -                      | -                         | -                         |
| 1997 | 6                 | 79878                          | 7.51                   | 1.50                      | 13.52                     |
| 1998 | 10                | 299182                         | 3.34                   | 1.27                      | 5.41                      |
| 1999 | 24                | 479834                         | 5.00                   | 3.00                      | 7.00                      |
| 2000 | 32                | 599694                         | 5.34                   | 3.49                      | 7.18                      |
| 2001 | 55                | 900147                         | 6.11                   | 4.50                      | 7.72                      |
| 2002 | 79                | 1098533                        | 7.19                   | 5.61                      | 8.78                      |
| 2003 | 115               | 1369800                        | 8.40                   | 6.86                      | 9.93                      |
| 2004 | 148               | 1502468                        | 9.85                   | 8.26                      | 11.44                     |
| 2005 | 258               | 1614733                        | 15.98                  | 14.03                     | 17.93                     |
| 2006 | 441               | 1770849                        | 24.90                  | 22.58                     | 27.23                     |
| 2007 | 964               | 1846500                        | 52.21                  | 48.91                     | 55.50                     |
| 2008 | 1520              | 1916648                        | 79.31                  | 75.32                     | 83.29                     |
| 2009 | 2199              | 2049874                        | 107.27                 | 102.79                    | 111.76                    |
| 2010 | 2993              | 2072657                        | 144.40                 | 139.24                    | 149.57                    |
| 2011 | 3729              | 2066914                        | 180.41                 | 174.63                    | 186.20                    |
| 2012 | 4534              | 2107103                        | 215.18                 | 208.92                    | 221.43                    |
| 2013 | 5340              | 2148786                        | 248.51                 | 241.86                    | 255.17                    |
| 2014 | 5790              | 2026564                        | 285.71                 | 278.36                    | 293.05                    |
| 2015 | 6111              | 1889368                        | 323.44                 | 315.35                    | 331.54                    |
| 2016 | 5199              | 1577517                        | 329.57                 | 320.63                    | 338.51                    |
| 2017 | 5217              | 1414986                        | 368.70                 | 358.71                    | 378.68                    |

Supplementary table 16: Regression model describing the risk of experiencing domestic abuse in women

| Incidence of domestic abuse in women |                                         |         |
|--------------------------------------|-----------------------------------------|---------|
|                                      | Adjusted* incidence rate ratio (95% CI) | P value |
| Age categories                       |                                         |         |
| 18-24 years                          | 1 (ref)                                 |         |
| 25-34 years                          | 0.84 (0.79-0.90)                        | <0.001  |
| 35-44 years                          | 0.57 (0.52-0.61)                        | <0.001  |
| 45-54 years                          | 0.26 (0.23-0.29)                        | <0.001  |
| 55-64 years                          | 0.12 (0.10-0.14)                        | <0.001  |
| 65+ years                            | 0.05 (0.04-0.06)                        | <0.001  |
| Ethnicity                            |                                         |         |
| White                                | 1 (ref)                                 |         |
| Mixed race                           | 1.16 (0.95-1.43)                        | 0.152   |
| Black                                | 1.64 (1.42-1.89)                        | <0.001  |
| South Asian                          | 2.14 (1.92-2.39)                        | <0.001  |
| Others                               | 2.19 (1.75-2.73)                        | <0.001  |
| Missing                              | 0.53 (0.50-0.56)                        | <0.001  |
| Townsend Deprivation Index           |                                         |         |
| 1 (Least deprived)                   | 1 (ref)                                 | 0.001   |
| 2                                    | 1.20 (1.08-1.35)                        | <0.001  |
| 3                                    | 1.55 (1.40-1.72)                        | <0.001  |
| 4                                    | 2.08 (1.88-2.30)                        | <0.001  |
| 5 (Most deprived)                    | 2.30 (2.71-3.30)                        | <0.001  |
| Missing                              | 1.65 (1.48-1.84)                        | <0.001  |

\*Adjusted for other demographic factors within the table

## STROBE Statement—checklist of items that should be included in reports of observational studies

|                           | Item No | Recommendation                                                                                                                                                                             | Reporting location     |
|---------------------------|---------|--------------------------------------------------------------------------------------------------------------------------------------------------------------------------------------------|------------------------|
| <b>Title and abstract</b> | 1       | (a) Indicate the study's design with a commonly used term in the title or the abstract                                                                                                     | Title and abstract     |
|                           |         | (b) Provide in the abstract an informative and balanced summary of what was done and what was found                                                                                        | Title and abstract     |
| <b>Introduction</b>       |         |                                                                                                                                                                                            |                        |
| Background/rationale      | 2       | Explain the scientific background and rationale for the investigation being reported                                                                                                       | Introduction           |
| Objectives                | 3       | State specific objectives, including any prespecified hypotheses                                                                                                                           | Introduction           |
| <b>Methods</b>            |         |                                                                                                                                                                                            |                        |
| Study design              | 4       | Present key elements of study design early in the paper                                                                                                                                    | Methods                |
| Setting                   | 5       | Describe the setting, locations, and relevant dates, including periods of recruitment, exposure, follow-up, and data collection                                                            | Methods                |
| Participants              | 6       | (a) <i>Cohort study</i> —Give the eligibility criteria, and the sources and methods of selection of participants. Describe methods of follow-up                                            | Methods                |
|                           |         | <i>Case-control study</i> —Give the eligibility criteria, and the sources and methods of case ascertainment and control selection. Give the rationale for the choice of cases and controls |                        |
|                           |         | <i>Cross-sectional study</i> —Give the eligibility criteria, and the sources and methods of selection of participants                                                                      |                        |
|                           |         | (b) <i>Cohort study</i> —For matched studies, give matching criteria and number of exposed and unexposed                                                                                   | N/A                    |
|                           |         | <i>Case-control study</i> —For matched studies, give matching criteria and the number of controls per case                                                                                 |                        |
|                           |         |                                                                                                                                                                                            |                        |
| Variables                 | 7       | Clearly define all outcomes, exposures, predictors, potential confounders, and effect modifiers. Give diagnostic criteria, if applicable                                                   | Methods                |
| Data sources/measurement  | 8*      | For each variable of interest, give sources of data and details of methods of assessment (measurement). Describe comparability of assessment methods if there is more than one group       | Methods                |
| Bias                      | 9       | Describe any efforts to address potential sources of bias                                                                                                                                  | Methods and discussion |
| Study size                | 10      | Explain how the study size was arrived at                                                                                                                                                  | Methods                |
| Quantitative variables    | 11      | Explain how quantitative variables were handled in the analyses. If applicable, describe which groupings were chosen and why                                                               | Methods                |
| Statistical methods       | 12      | (a) Describe all statistical methods, including those used to control for confounding                                                                                                      | Methods                |
|                           |         | (b) Describe any methods used to examine subgroups and interactions                                                                                                                        | Methods                |
|                           |         | (c) Explain how missing data were addressed                                                                                                                                                | Methods                |
|                           |         | (d) <i>Cohort study</i> —If applicable, explain how loss to follow-up was addressed                                                                                                        | Methods                |
|                           |         | <i>Case-control study</i> —If applicable, explain how matching of cases                                                                                                                    |                        |



1  
2  
3  
4  
5  
6  
7  
8  
9  
10  
11  
12  
13  
14  
15  
16  
17  
18  
19  
20  
21  
22  
23  
24  
25  
26  
27  
28  
29  
30  
31  
32  
33  
34  
35  
36  
37  
38  
39  
40  
41  
42  
43  
44  
45  
46  
47  
48  
49  
50  
51  
52  
53  
54  
55  
56  
57  
58  
59  
60

and controls was addressed

*Cross-sectional study*—If applicable, describe analytical methods taking account of sampling strategy

---

(e) Describe any sensitivity analyses

Methods

Continued on next page

For peer review only

| <b>Results</b>           |     |                                                                                                                                                                                                              |                   |
|--------------------------|-----|--------------------------------------------------------------------------------------------------------------------------------------------------------------------------------------------------------------|-------------------|
| Participants             | 13* | (a) Report numbers of individuals at each stage of study—eg numbers potentially eligible, examined for eligibility, confirmed eligible, included in the study, completing follow-up, and analysed            | Results           |
|                          |     | (b) Give reasons for non-participation at each stage                                                                                                                                                         | n/a               |
|                          |     | (c) Consider use of a flow diagram                                                                                                                                                                           | n/a               |
| Descriptive data         | 14* | (a) Give characteristics of study participants (eg demographic, clinical, social) and information on exposures and potential confounders                                                                     | Results           |
|                          |     | (b) Indicate number of participants with missing data for each variable of interest                                                                                                                          | Table 1           |
|                          |     | (c) <i>Cohort study</i> —Summarise follow-up time (eg, average and total amount)                                                                                                                             | Results           |
| Outcome data             | 15* | <i>Cohort study</i> —Report numbers of outcome events or summary measures over time                                                                                                                          | Results           |
|                          |     | <i>Case-control study</i> —Report numbers in each exposure category, or summary measures of exposure                                                                                                         |                   |
|                          |     | <i>Cross-sectional study</i> —Report numbers of outcome events or summary measures                                                                                                                           |                   |
| Main results             | 16  | (a) Give unadjusted estimates and, if applicable, confounder-adjusted estimates and their precision (eg, 95% confidence interval). Make clear which confounders were adjusted for and why they were included | Results           |
|                          |     | (b) Report category boundaries when continuous variables were categorized                                                                                                                                    | Results           |
|                          |     | (c) If relevant, consider translating estimates of relative risk into absolute risk for a meaningful time period                                                                                             | Results           |
| Other analyses           | 17  | Report other analyses done—eg analyses of subgroups and interactions, and sensitivity analyses                                                                                                               | Results           |
| <b>Discussion</b>        |     |                                                                                                                                                                                                              |                   |
| Key results              | 18  | Summarise key results with reference to study objectives                                                                                                                                                     | Discussion        |
| Limitations              | 19  | Discuss limitations of the study, taking into account sources of potential bias or imprecision. Discuss both direction and magnitude of any potential bias                                                   | Discussion        |
| Interpretation           | 20  | Give a cautious overall interpretation of results considering objectives, limitations, multiplicity of analyses, results from similar studies, and other relevant evidence                                   | Discussion        |
| Generalisability         | 21  | Discuss the generalisability (external validity) of the study results                                                                                                                                        | Discussion        |
| <b>Other information</b> |     |                                                                                                                                                                                                              |                   |
| Funding                  | 22  | Give the source of funding and the role of the funders for the present study and, if applicable, for the original study on which the present article is based                                                | Funding statement |

\*Give information separately for cases and controls in case-control studies and, if applicable, for exposed and unexposed groups in cohort and cross-sectional studies.

**Note:** An Explanation and Elaboration article discusses each checklist item and gives methodological background and published examples of transparent reporting. The STROBE checklist is best used in conjunction with this article (freely available on the Web sites of PLoS Medicine at <http://www.plosmedicine.org/>, Annals of Internal Medicine at <http://www.annals.org/>, and Epidemiology at <http://www.epidem.com/>). Information on the STROBE Initiative is available at [www.strobe-statement.org](http://www.strobe-statement.org).

# BMJ Open

**An exploration of trends in the incidence and prevalence of childhood maltreatment and domestic abuse recording in UK primary care: a retrospective cohort study using 'The Health Improvement Network' database**

|                                 |                                                                                                                                                                                                                                                                                                                                                                                                                                                                                                                                                                                                                                                                                                                       |
|---------------------------------|-----------------------------------------------------------------------------------------------------------------------------------------------------------------------------------------------------------------------------------------------------------------------------------------------------------------------------------------------------------------------------------------------------------------------------------------------------------------------------------------------------------------------------------------------------------------------------------------------------------------------------------------------------------------------------------------------------------------------|
| Journal:                        | <i>BMJ Open</i>                                                                                                                                                                                                                                                                                                                                                                                                                                                                                                                                                                                                                                                                                                       |
| Manuscript ID                   | bmjopen-2020-036949.R1                                                                                                                                                                                                                                                                                                                                                                                                                                                                                                                                                                                                                                                                                                |
| Article Type:                   | Original research                                                                                                                                                                                                                                                                                                                                                                                                                                                                                                                                                                                                                                                                                                     |
| Date Submitted by the Author:   | 26-Mar-2020                                                                                                                                                                                                                                                                                                                                                                                                                                                                                                                                                                                                                                                                                                           |
| Complete List of Authors:       | Chandan, Joht; University of Birmingham College of Medical and Dental Sciences, ; University of Warwick Warwick Medical School, Gokhale, Krishna; University of Birmingham, Institute of Applied Health Research<br>Bradbury-Jones, C; University of Birmingham College of Medical and Dental Sciences, School of Nursing<br>Nirantharakumar, Krishnarajah; University of Birmingham College of Medical and Dental Sciences, Institute of Applied Health Research<br>Bandyopadhyay, Siddhartha; University of Birmingham, The Department of Economics<br>Taylor, Julie; University of Birmingham, School of Nursing, College of Medical and Dental Sciences, ; Birmingham Women's and Children's NHS Foundation Trust |
| <b>Primary Subject Heading</b>: | Epidemiology                                                                                                                                                                                                                                                                                                                                                                                                                                                                                                                                                                                                                                                                                                          |
| Secondary Subject Heading:      | Public health                                                                                                                                                                                                                                                                                                                                                                                                                                                                                                                                                                                                                                                                                                         |
| Keywords:                       | EPIDEMIOLOGY, Child protection < PAEDIATRICS, PRIMARY CARE                                                                                                                                                                                                                                                                                                                                                                                                                                                                                                                                                                                                                                                            |
|                                 |                                                                                                                                                                                                                                                                                                                                                                                                                                                                                                                                                                                                                                                                                                                       |

SCHOLARONE™  
Manuscripts



I, the Submitting Author has the right to grant and does grant on behalf of all authors of the Work (as defined in the below author licence), an exclusive licence and/or a non-exclusive licence for contributions from authors who are: i) UK Crown employees; ii) where BMJ has agreed a CC-BY licence shall apply, and/or iii) in accordance with the terms applicable for US Federal Government officers or employees acting as part of their official duties; on a worldwide, perpetual, irrevocable, royalty-free basis to BMJ Publishing Group Ltd ("BMJ") its licensees and where the relevant Journal is co-owned by BMJ to the co-owners of the Journal, to publish the Work in this journal and any other BMJ products and to exploit all rights, as set out in our [licence](#).

The Submitting Author accepts and understands that any supply made under these terms is made by BMJ to the Submitting Author unless you are acting as an employee on behalf of your employer or a postgraduate student of an affiliated institution which is paying any applicable article publishing charge ("APC") for Open Access articles. Where the Submitting Author wishes to make the Work available on an Open Access basis (and intends to pay the relevant APC), the terms of reuse of such Open Access shall be governed by a Creative Commons licence – details of these licences and which [Creative Commons](#) licence will apply to this Work are set out in our licence referred to above.

Other than as permitted in any relevant BMJ Author's Self Archiving Policies, I confirm this Work has not been accepted for publication elsewhere, is not being considered for publication elsewhere and does not duplicate material already published. I confirm all authors consent to publication of this Work and authorise the granting of this licence.

1  
2  
3  
4  
5  
6  
7  
8  
9  
10  
11  
12  
13  
14  
15  
16  
17  
18  
19  
20  
21  
22  
23  
24  
25  
26  
27  
28  
29  
30  
31  
32

# An exploration of trends in the incidence and prevalence of childhood maltreatment and domestic abuse recording in UK primary care: a retrospective cohort study using 'The Health Improvement Network' database

33  
34

**Author Names:**

35 Joht Singh Chandan, Krishna Gokhale, Caroline-Bradbury Jones, Krishnarajah Nirantharakumar\*,  
36 Siddhartha Bandyopadhyay\*, Julie Taylor\*

37  
38 \*Equal Contribution

39  
40  
41

**Authors Addresses and Positions:**

42

**Corresponding author:**

43 Dr Joht Singh Chandan MFPH

44 Academic Clinical Fellow in Public Health

45 Institute of Applied Health Research, College of Medical and Dental Sciences, University of  
46 Birmingham, B152TT

47 [Joht.chandan@nhs.net](mailto:Joht.chandan@nhs.net)

48 07535712715

49  
50  
51

**Co-authors:**

52 Mr Krishna Margadhamane Gokhale MSc

53 Research Fellow

54 Institute of Applied Health Research, College of Medical and Dental Sciences, University of  
55 Birmingham, B152TT

56  
57 Dr Caroline Bradbury-Jones

58 Reader in Nursing

59 School of Nursing, College of Medical and Dental Sciences, University of Birmingham, B152TT  
60

1  
2  
3  
4 Dr Krishnarajah Nirantharakumar MD  
5 Senior Clinical Lecturer & UKRI Innovation Clinical Fellow  
6 Midlands Health Data Research UK & Institute of Applied Health Research, College of Medical and  
7 Dental Sciences, University of Birmingham, B152TT  
8

9  
10 Professor Siddhartha Bandyopadhyay PhD (Full Professor)  
11 Professor of Economics and Director of the Centre of Crime, Justice and Policing  
12 The Department of Economics, University of Birmingham, B152TT  
13

14 Professor Julie Taylor PhD (Full Professor)  
15 Professor of Child Protection  
16 School of Nursing, College of Medical and Dental Sciences, University of Birmingham, B152TT  
17 Birmingham Women's and Children's Hospitals NHS Foundation Trust, Birmingham.  
18  
19  
20  
21

22 **Word count:** 4148 words

### 23 **Abstract**

24 **Objectives:** Describe the epidemiology of childhood maltreatment and domestic abuse (in  
25 women)  
26

27  
28 **Design:** Analysis of longitudinal records between 1<sup>st</sup> January 1995 to 31<sup>st</sup> December 2018  
29

30  
31 **Setting:** A UK primary care database: 'The Health Improvement Network' (THIN)  
32

33 **Participants:** 11,831,850 eligible patients from 787 contributing practices. Childhood  
34 maltreatment and domestic abuse (women only) were defined as the presence of a  
35 recorded Read code.  
36

37  
38 **Outcome measures:** The incidence rate (IR) and prevalence of childhood maltreatment (in  
39 children aged 0-18 years) and domestic abuse (in women aged over 18) between 1996-  
40 2017. An adjusted incidence rate ratio (aIRR) is given to examine the differences in IRs based  
41 on sex, ethnicity and deprivation.  
42

43  
44 **Results:** The age and gender breakdown of THIN has been previously reported to be  
45 representative of the UK population, however, there is substantial missing information on  
46 deprivation quintiles (<20%) and ethnicity (approximately 50%). The IR (IR 60.1; 95% CI 54.3-  
47 66.0 per 100,000 child years) and prevalence (416.1; 95% CI 401.3-430.9 per 100,000 child  
48 population) of childhood maltreatment rose until 2017. The aIRR was greater in patients  
49 from the most deprived backgrounds (aIRR 5.14; 95% CI 4.57-5.77 compared to least  
50 deprived) and from an ethnic minority community (e.g. Black aIRR 1.25; 1.04-1.49 compared  
51 to White). When examining domestic abuse in women, in 2017, the IR was 34.5 (31.4-37.7)  
52 per 100,000 adult years and prevalence 368.7 (358.7-378.7) per 100,000 adult population.  
53 Similarly, the IR was highest in the lowest socio-economic class (aIRR 2.30; 2.71-3.30) and in  
54 ethnic minorities (South Asian aIRR 2.14; 1.92-2.39 and Black aIRR 1.64; 1.42-1.89).  
55  
56  
57

58  
59 **Conclusion:** Despite recent improvements in recording, there is still a substantial under-  
60 recording of maltreatment and abuse within UK primary care records, compared to

1  
2  
3 currently existing sources of childhood maltreatment and domestic abuse data. Approaches  
4 must be implemented to improve recording and detection of childhood maltreatment and  
5 domestic abuse within medical records.  
6  
7

8 **Keywords:** Domestic abuse, childhood maltreatment, epidemiology, primary care, incidence  
9  
10

### 11 12 13 14 **Strengths and limitations of this study** 15

- 16 • Primary care data encompasses a vast proportion of society, and as current guidance is to  
17 ensure identification of domestic abuse and childhood maltreatment by General  
18 Practitioners, studying the epidemiology within this dataset is important
- 19 • Despite the vast cohort size, our results demonstrate substantial under-recording of  
20 childhood maltreatment and domestic abuse
- 21 • Although the study was able to examine trends by age, gender, deprivation and  
22 ethnicity, trends by ethnicity were limited due to extensive missing data within UK primary  
23 care
- 24 • Before primary care data can be used as a tool for public health surveillance of childhood  
25 maltreatment and domestic abuse, there is a definite need for improved recording and/or  
26 reporting  
27  
28  
29  
30  
31  
32  
33  
34  
35  
36  
37  
38  
39  
40  
41  
42  
43  
44  
45  
46  
47  
48  
49  
50  
51  
52  
53  
54  
55  
56  
57  
58  
59  
60

## INTRODUCTION

Childhood maltreatment (physical, sexual or emotional abuse and neglect against those under the age of 18 years)<sup>1</sup> and domestic abuse (controlling, coercive, threatening behaviour, violence or abuse between those who are, or have been, intimate partners or family members)<sup>2</sup> are global public health problems. The negative downstream social, psychological and physical health effects of childhood maltreatment and domestic abuse bear a substantial societal cost.<sup>3–11</sup> Therefore, a public health approach is urgently needed to prevent both the occurrence of childhood maltreatment and domestic abuse as well as their secondary consequences. In order to support a public health approach, high quality data recording relating to these exposures plays an important role. Exploring the role of routinely collected data (which due its repeatable nature can be used for surveillance) in the UK as well as other countries is crucial in both the estimation of the societal burden of disease as well as the identification of risk and protective factors.<sup>12</sup>

Exposure to domestic abuse and childhood maltreatment remain taboo topics in many cultures, despite the adverse consequences in terms of health and wellbeing, with significant stigma around disclosure of traumatic events.<sup>13,14</sup> As a result, survivors of such traumatic experiences often find it difficult to attend and seek support from public sector authorities such as healthcare staff.<sup>15,16</sup> There are also challenges for healthcare staff to routinely enquire or ask about such experiences in their patients' lives.<sup>17</sup> The combination of barriers to disclosure and enquiry are likely to lead to a hidden burden of domestic abuse and childhood maltreatment not captured in administrative public sector data. However, since introductions of new guidelines in the UK (National Institute of Health and Care Excellence in 2016 and 2017), the hope has been that administrative recording will have improved.<sup>18,19</sup> This drive towards improved reporting is spurred on by UK media and governmental interest in these topics (high profile events leading to media and governmental interest include: the death of Baby P, the Jimmy Savile inquiry, Operation Yewtree, the death of Daniel Pelka, the identification and referral to improve safety (IRIS) trial and the consideration of the domestic abuse bill), and the consequent expectation that administrative recording will have improved.<sup>20–24</sup>

Current UK national estimates of domestic abuse are largely derived from self-reported surveys in conjunction with administrative data. The crime survey for England and Wales (CSEW) provides self-reported information and used in conjunction with police records of the number of recorded domestic abuse incidents to define epidemiological estimates of domestic abuse. In women, the reported prevalence from the CSEW (for those aged 16–59 years old) was 7.9% in the financial year 2017/2018 while the crude estimate derived from



1  
2  
3 police data for the year ending 2017 (not yet available for 2018 for those aged 16 and over)  
4 across England was 24.0/1,000 population (in men and women).<sup>25,26</sup>  
5  
6

7 Unfortunately, the use of alternative administrative records pertaining to information on  
8 domestic abuse are limited to recording processes such as hospital records. There is no  
9 specific international classification of disease code that are specific to domestic abuse: The  
10 closest matches are T74.1 (physical abuse, confirmed), Y07.0 (spouse or partner,  
11 perpetrator of maltreatment and neglect) and Z63.0 (and problems in a relationship with  
12 spouse or partner) which when specified in adults relate to physical abuse, maltreatment.<sup>27</sup>  
13 However, there are substantial limitations to utilising these codes to describe the  
14 epidemiology of domestic abuse, due to low numbers of such codes being recorded and also  
15 ambiguities in coding practice between hospital trusts.<sup>27</sup>  
16  
17  
18

19 The state of epidemiological estimates when exploring childhood maltreatment suffers from  
20 similar challenges. A recent observational study utilised data from 1858-2016 that was  
21 derived from child mortality records, police recorded-homicides, crimes against children,  
22 child protection data, children in care and data taken from the National Society for the  
23 Prevention of Cruelty to Children (NSPCC) to study long term trends of child maltreatment.  
24 The study found a decreasing long-term trend in child maltreatment until the year 2000 but  
25 reported an increase thereafter.<sup>28</sup> However child mortality continued to decrease.<sup>28</sup> A  
26 recommendation of the report was to further research and establish whether child  
27 maltreatment is continuing to increase.<sup>28</sup> However, once again when taken from the CSEW,  
28 the estimated prevalence of experiencing childhood maltreatment was 18.9% (financial year  
29 end 2016).<sup>29</sup> The information relating to the incidence rate for those at risk of childhood  
30 maltreatment or domestic abuse is low. One approach to attempt to do so is to use records  
31 taken from general practice (GP). A previous study using GP recorded data between 1995 to  
32 2010 explored the incidence rates and prevalence of childhood maltreatment related  
33 concerns (includes information relating to suspected and possible maltreatment) and  
34 identified an increase in incidence and prevalence of maltreatment related concerns  
35 between this time.<sup>30</sup>  
36  
37  
38  
39  
40

41 In summary, the limitations of existing estimates relate to challenges with: 1) continuous  
42 recording of survey data to allow for active surveillance and examination of trends; 2) social  
43 desirability bias<sup>31</sup> leading to an under-estimation in survey estimates; 3) selection bias<sup>32</sup>  
44 leading to an under-estimation in administrative datasets; 4) an appropriate denominator  
45 population to describe prevalence in administrative data.  
46  
47

48 Primary care data from sources such as 'The Health Improvement Network' (THIN) database  
49 have previously been shown to be representative of the UK population in terms of age  
50 structure and can provide a suitable denominator population to examine the epidemiology  
51 of public health risk factors.<sup>33</sup> Additionally, new guidelines and interventions have been put  
52 in place to improve recording of childhood maltreatment and domestic abuse.<sup>18,19,24,34</sup> The  
53 last time primary care data was explored to describe a similar risk factor was in 2010 prior  
54 to these improvements. Therefore, there is a need to describe the current estimates of  
55 childhood maltreatment and domestic abuse from primary care data and compare these to  
56 existing estimates to describe the possibility of further use of primary care data to support  
57  
58  
59  
60

1  
2  
3 policy makers/public health professionals in decisions relating to the burden of  
4 maltreatment and abuse.  
5

6  
7 Our aim was to investigate how the incidence and prevalence of childhood maltreatment  
8 and domestic abuse have changed between 1996-2017 using 'The Health Improvement  
9 Network' (THIN) primary care database.  
10

## 11 **METHODS**

### 12 **Study design and data source**

13 A cohort was extracted of eligible patients who contributed to the dataset between 1<sup>st</sup>  
14 January 1995 and 31<sup>st</sup> December 2018. Using this cohort, it was possible to describe the  
15 yearly incidence rate (IR) and prevalence of childhood maltreatment and domestic abuse.  
16 Using the cohort it was also possible to describe the cumulative IR broken down by age  
17 group, gender (in childhood maltreatment), deprivation and ethnicity.  
18  
19

20  
21 During the study period, the dataset consisted of medical records taken from 787 UK  
22 general practices and deemed to be representative of the UK population.<sup>35</sup> THIN records  
23 information relating to demographics, disease progression and management.<sup>36</sup> Information  
24 relating to symptoms, examinations, and diagnoses are documented using a hierarchical  
25 clinical coding system called Read codes.<sup>37</sup>  
26  
27

### 28 **Population, exposure and outcomes**

29  
30  
31 General practices were eligible for inclusion 12 months following installation of electronic  
32 health records or from the practice's acceptable mortality recording date.<sup>38,39</sup> Inclusion of  
33 data after these points were measures of quality assurance for the dataset. During the study  
34 period from 1<sup>st</sup> January 1995 and 31<sup>st</sup> December 2018, there were 11,831,850 eligible  
35 patient records following this inclusion criteria.  
36  
37

38  
39 The outcomes of interest (childhood maltreatment or domestic abuse) were both defined  
40 by presence of a relevant Read code relating to patient exposure. As the aim of this study  
41 was to examine incidence and prevalence, the code list used to define incidence and  
42 prevalence varied to account for codes that mention a history of the exposure (for the  
43 calculation of prevalence but not for incidence rate). The list of Read codes used in this  
44 study to describe childhood maltreatment/domestic abuse (varied by incidence and  
45 prevalence) are documented in the supplementary (supplementary read code lists) and  
46 selection of such codes are described in previous published work.<sup>7,9,40,41</sup> Domestic abuse  
47 exposure in this study was limited to only female patients as comparatively very low  
48 numbers of men had recorded incidents of domestic abuse during the study period  
49 (displayed in table 1). The annual incidence rate and prevalence of domestic abuse  
50 experienced by men between 2005-2017 is displayed on supplementary tables 1-2.  
51  
52  
53

54  
55 Dependent on the outcome of interest, there were further inclusion criteria on the study  
56 population which was eligible for inclusion. To calculate the IR and prevalence of childhood  
57 maltreatment, we only included patients under the age of 18 at cohort entry. We enforced a  
58 study criterion that patients would have to exit the study by their 18<sup>th</sup> birthday as they  
59 would no longer be contributing child-years (CY) at risk. During the study period the total  
60

1  
2  
3 population amounted to 3,045,456 children. In order to calculate the IR and prevalence of  
4 domestic abuse, a female adult cohort was selected who had an eligible cohort entry date  
5 from the age of 18 years onwards (4,982,781 eligible patients). The purpose being to allow  
6 us to calculate an IR of adult years (AY) at risk. Additionally, there is debate about whether  
7 children living in a household where there is domestic abuse overlaps with the definition of  
8 child maltreatment as a form of adverse childhood experience (ACEs).<sup>42</sup> Therefore, to avoid  
9 confusion in definition between childhood maltreatment and experiencing ACEs which  
10 include other markers of household adversity, we have restricted our domestic abuse  
11 population to only those over the age of 18 years.  
12  
13  
14

### 15 **Statistical analysis and follow up**

16 For annual point prevalence, the numerator was the cumulative count of eligible individuals  
17 with any record of domestic abuse (occurred over 18 years) or childhood maltreatment  
18 (occurred under 18 years) identified at the 1<sup>st</sup> January each year from 1996 to 2017 who  
19 were then divided by the total eligible population on the same date (denominator). The  
20 prevalence is described per 100,000 population (in the domestic abuse cohort per 100,000  
21 adult population and childhood maltreatment cohort per 100,000 child population) with  
22 their associated confidence intervals (CI).  
23  
24  
25

26 A series of yearly cohort studies were performed to calculate the crude IR of domestic abuse  
27 and childhood maltreatment for each year from 1996 to 2017. The numerator was the new  
28 number of cases in that calendar year, divided by the total number of person-years at risk  
29 (denominator) for the given year. In each annual cohort study to determine IR, the period of  
30 follow up was defined as:  
31  
32

33 Entry date: The latest date of either study start date (1<sup>st</sup> of January each year), one year  
34 after electronic medical records were implemented, one year after the practice reached  
35 acceptable mortality recording date or when the patient met the age inclusion criteria if one  
36 was present (e.g. patients had to reach 18 years before they were eligible for entry into the  
37 domestic abuse study population).  
38  
39  
40

41 Exit date: The earliest date of either study end date (31<sup>st</sup> of December each year), outcome  
42 date (new incident of childhood maltreatment or domestic abuse), death date, transfer date  
43 (when patient moved practice and were censored from the dataset), collection date (last  
44 date the practice contributed to the dataset) and the date when patient's age crosses the  
45 age inclusion criteria (e.g. patients will exit the cohort when they turn 18 for the IR  
46 calculation of childhood maltreatment).  
47  
48  
49

50 Graphical representations of the incidence and prevalence was conducted from years where  
51 there were 5 or more incident cases of domestic abuse (2005) or childhood maltreatment  
52 (1997). The annual IR and prevalence are also stratified by sex (male or female) for  
53 childhood maltreatment.  
54  
55

56 Additionally, the cumulative IR for the whole time period from the 1<sup>st</sup> January 1995 to 31<sup>st</sup>  
57 December 2018 was stratified by age category of outcome incidence (defined using  
58 categories used by the Department of Education to allow for comparison),<sup>43</sup> Townsend  
59  
60

1  
2  
3 deprivation quintile,<sup>44</sup> ethnicity and sex when using data for the whole time period from the  
4 1<sup>st</sup> January 1995 to 31<sup>st</sup> December 2018.  
5

6  
7 To discern differences between ethnic groups and deprivation quintiles (in the child cohort)  
8 a multivariate (adjusting for each other, sex and age at cohort entry) Poisson regression  
9 offsetting for person years of follow-up was used to calculate an adjusted incidence rate  
10 ratio (aIRR). Where there were missing data in our covariates (Ethnicity and Townsend  
11 quintile), these were treated as a separate missing category and included in the final model.  
12 Significance was set at  $p < 0.05$ .  
13

14  
15 Statistical analysis was conducted using STATA MP/4 v15.1 (Statacorp 2017). Wherever IR,  
16 IRR and prevalence are presented, associated 95% confidence intervals (CI) are given in  
17 conjunction.  
18

### 19 20 **Patient and public involvement**

21 No patients were actively involved in setting the research question, outcome measures,  
22 study design, results interpretation of write up of the results. There are plans for the results  
23 to be disseminated to the community affected by this research through childhood  
24 maltreatment and domestic abuse charities and social media channels.  
25

### 26 27 **Ethical Approval**

28 Anonymised data were used throughout the study provided by the data provider to the  
29 University of Birmingham. Studies using The Health Improvement Network (THIN) database  
30 have had initial ethical approval from the NHS South-East Multicentre Research Ethics  
31 Committee, subject to prior independent scientific review. The Scientific Review Committee  
32 (IQVIA) approved the study protocol (SRC Reference Number: SRC18THIN034) prior to its  
33 undertaking.  
34  
35

### 36 37 **RESULTS**

38 During the study period there was a total of 4,603 incident episodes of childhood  
39 maltreatment cohort in a cohort of 3,045,456 children (aged under 18). In the adult female  
40 cohort (aged over 18), there were 5,598 incident recorded episodes of domestic abuse in  
41 the total female population of 4,982,781 patients. Table 1 outlines the characteristics of  
42 both cohorts at cohort entry as well as the patients who were incident cases of childhood  
43 maltreatment and domestic abuse.  
44  
45

#### 46 47 *Childhood maltreatment*

48 The IR of childhood maltreatment increased from 22.5 per 100,000 CY (95% CI 11.8-33.2) in  
49 1997 to 60.1 per 100,000 CY (95% CI 54.3-66.0) in 2017. There was a steadily increasing trend  
50 from 2007 to 2012 and a steep rise between the year 2012 (IR 30.0; 95% CI 26.8-33.3 per  
51 100,000 CY) and 2013 (IR 52.3; 95% CI 47.9-56.7 per 100,000 CY), after which it remained  
52 relatively stable until 2017. Further details can be seen in figure 1a and supplementary table  
53 3.  
54  
55

56  
57 When broken down by sex, a similar temporal trend is noted between both males and  
58 females. However, the cumulative IR was higher in the female cohort (IR 27.2; 95% CI 26.1-  
59 18.6 per 100,000 CY) was greater when compared to the male cohort (IR 19.4; 95% CI 18.6-  
60

20.3 per 100,000 CY). The IR in females in 2017 was 66.2 (95% CI 57.4-75.1) per 100,000 CY compared to IR of 54.3 (95% CI 46.5-62.1) per 100,000 CY in males. Further details of the trends are seen on figure 1 b-c and supplementary tables 4-5.

The age range was broken down into the categories 0-1, 1-4, 5-9, 10-15 and 16-17 years. The group with the highest IR was the 0-1-year cohort (IR 52.7; 95% CI 47.9-58.0 per 100,000 CY) and whereas the 16-17 group (IR 21.2; 95% CI 19.0-23.5 per 100,000 CY) had the lowest IR (figure 1d and supplementary table 6). When examining by socio-economic deprivation quintile there was a linear relationship observed between IR and deprivation. More details are seen in figure 1e and supplementary table 7. Lastly, the IR was higher in the ethnic minority groups (Black (IR 45.1; 95% CI 37.4-52.9 per 100,000 CY), South Asian (IR 34.7; 95% CI 29.0-40.4 per 100,000 CY) and Other backgrounds (IR 48.1; 95% CI 37.3-58.9 per 100,000 CY)) when compared with those who had a White (IR 27.7; 95% CI 26.5-29.0 per 100,000 CY) or mixed ethnicity (IR 21.8; 95% CI 13.4-30.2 per 100,000 CY). Further details are provided in figure 1f and supplementary table 8.

The prevalence of childhood maltreatment steadily increased from 176.3 (95% CI 132.8-219.8) per 100,000 child population in 1997 to 416.1 (95% CI 401.3-430.9) per 100,000 population in 2017. This can be seen in figure 2 and supplementary table 9.

In the multivariate analysis following adjustment for age at cohort entry, sex and deprivation quintile, the increased risk apparent in South Asians compared to White children was not evident (aIRR 1.06; 95% CI 0.89-1.26). However, the Black (aIRR 1.25; 95% CI 1.04-1.49) and other (aIRR 1.45; 95% CI 1.15-1.82) populations were at a greater risk. In the above analysis there was a gradient increase observed in the risk of childhood maltreatment with worsening deprivation. The most deprived quintile had a five-fold increased risk of childhood maltreatment (aIRR 5.14; 95% CI 4.57-5.77). Further details are seen in supplementary table 10.

#### *Domestic abuse*

The IR of domestic abuse increased from 0.3 per 100,000 AY (95% CI 0.0-0.6) in 2005 to 34.6 per 100,000 AY (95% CI 31.4-37.7) in 2017. The trend was increasing relatively steadily from 2006 to 2013 followed by a steep increase in 2014 (IR 35.8; 95% CI 33.2-38.5 per 100,000 AY). Further details can be seen in figure 3a and supplementary table 11.

The age range was broken down into the categories 18-24, 25-34, 35-44, 45-54, 55-64 and over 65 years. The groups with the highest IR were 18-24 (IR 33.0; 95% CI 31.2-34.9 per 100,000 AY) and 25-34-year cohorts (IR 33.7; 95% CI 32.2-35.3 per 100,000 AY), followed by a decline by age group. Further details are seen in figure 3b and supplementary table 12. When examining by deprivation quintile, again a linear trend was seen where there was a fourfold increased risk of new domestic abuse incidence in the most deprived quintile (IR 36.3; 95% CI 34.3-38.3 per 100,000 AY) compared to the least deprived (IR 8.9; 95% CI 8.2-9.6 per 100,000 AY). More information can be found in figure 3c and supplementary table 13. Lastly, similar to childhood maltreatment, a disparity was seen in relation to ethnic group, where Black (IR 55.0; 95% CI 47.7-62.6 per 100,000 AY), South Asian (IR 65.4; 95% CI 58.6-72.2 per 100,000 AY) and Other background (IR 73.6; 95% CI 57.4-89.7 per 100,000

1  
2  
3  
4  
5  
6  
7  
8  
9  
10  
11  
12  
13  
14  
15  
16  
17  
18  
19  
20  
21  
22  
23  
24  
25  
26  
27  
28  
29  
30  
31  
32  
33  
34  
35  
36  
37  
38  
39  
40  
41  
42  
43  
44  
45  
46  
47  
48  
49  
50  
51  
52  
53  
54  
55  
56  
57  
58  
59  
60

AY)) had a higher incidence rate when compared with those who had a White (IR 21.5; 95% CI 20.7-22.3 per 100,000 AY) or mixed ethnic (IR 36.8; 95% CI 29.4-44.2 per 100,000 AY) background. Figure 3d and supplementary table 14 contain additional detail.

The prevalence of domestic abuse increased in an almost linear manner from 16.0 (95% CI 14.0-17.9) per 100,000 adult population to 368.7 (95% CI 358.7-378.9) per 100,000 adult population in 2017. This can be seen in figure 4 and from supplementary table 15.

In the multivariate regression analysis, it was evident that ethnicity played a factor in the risk of domestic abuse. South Asians (aIRR 2.14; 95% CI 1.92-2.39), Black (aIRR 1.64; 95% CI 1.42-1.89) and Other (aIRR 2.19; 95% CI 1.75-2.73) populations were all at a greater risk than the White cohort. Similar to childhood maltreatment there was a gradient increase between worsening deprivation and the risk of domestic abuse. The most deprived quintile had an aIRR of 2.30; 95%CI 2.71-3.30. Further details contained within supplementary table 16.

## DISCUSSION

### Summary of key findings

The IR of both childhood maltreatment and domestic abuse increased until 2017 (60.1 (95% CI 54.3-66.0) per 100,000 CY and 34.6 (95% CI 31.4-37.7) per 100,000 AY respectively in 2017). Additionally, the prevalence of both childhood maltreatment and domestic abuse continued to increase in a linear fashion until 2017. Of interest there were similar patterns of risk in both groups. For both childhood maltreatment and domestic abuse, there was a substantially increased aIRR seen in those from a more deprived background when compared to the least deprived, and a greater incidence rate of new cases of both childhood maltreatment and domestic abuse in those from an ethnic minority background despite taking into account other co-variables. The IR was also highest in the 0-1-year group and in females for childhood maltreatment and the 18-24-year group for those experiencing domestic abuse. The most notable finding is the high level of under-recording of childhood maltreatment and domestic abuse in the dataset in comparison to those reported in self-reported surveys including the CSEW and NSPCC survey.

### Comparison to current literature

As this was the first cohort to the authors' knowledge to explore the annual incidence and prevalence of domestic abuse (in women) using UK primary care records, it is difficult to compare the incidence rates directly with other studies. However for childhood maltreatment, one previous study (including data from 1995-2010) reported the IR of childhood maltreatment related concerns using THIN.<sup>30</sup> The maltreatment related concern codes included cases of suspected or probable maltreatment which would explain why their documented IR and prevalence are substantially higher than those reported in our study.<sup>30</sup> However, of note in that study they demonstrated an increased IR of childhood maltreatment related concerns in those in the under one group, those who are female and almost a five times increased risk in those from the most deprived group when compared to the lowest group, all of which are similar to our findings.<sup>30</sup>

1  
2  
3 Of particular note, a key finding of our study was the prevalence and IR were much lower  
4 than estimates derived from currently existing sources of childhood maltreatment and  
5 domestic abuse epidemiology. When examining UK police reports of domestic abuse,  
6 although for both genders, the prevalence in England was 24.0 per 1,000 population, much  
7 higher than in our study even though we only included a female denominator population.<sup>25</sup>  
8 When compared to the CSEW data which showed a prevalence of 7.9% in women, our figure  
9 seems even lower.<sup>26</sup> Similarly, although no combined child maltreatment figure exists for  
10 police reports, if we examine the estimated prevalence from the CSEW which suggested  
11 18.9% of all adults have experienced some form of childhood maltreatment our figure of 4.2  
12 per 1,000 population (2017) is substantially lower.<sup>29</sup> When compared to other  
13 administrative data such as children in need data, which contains the rate of children on  
14 Child protection plans, GP recorded prevalence still remains low, which has also been shown  
15 in previous literature on maltreatment related concerns.<sup>30,45</sup>  
16  
17  
18  
19

20 The low values of incidence and prevalence of childhood maltreatment and domestic abuse  
21 and other interesting findings resonate and build on known literature. There have been  
22 national policy reports highlighting inconsistencies in data collected relating domestic abuse  
23 and childhood maltreatment to poverty and ethnicity.<sup>46,47</sup> However, we clearly demonstrate  
24 a linear relationship between IR and socio-economic deprivation following adjustment for  
25 ethnicity. When adjusting for deprivation, GP data still highlights the burden of  
26 maltreatment and abuse experienced in ethnic minorities (although South Asians were not  
27 at a higher risk of childhood maltreatment, and mixed raced individuals were not at a higher  
28 risk of either childhood maltreatment or domestic abuse). It has been previously highlighted  
29 that black and minority ethnic children are over-represented in child protection records  
30 within the UK, but this may be related to poverty (a form of which we have been able to  
31 adjust for in our study), isolation and willingness to seek help due to stigma in some  
32 communities.<sup>48</sup> In contrast to our findings, the prevalence reported for domestic abuse  
33 exposure CSEW was highest in those from a mixed race background, and lower in those  
34 from the South Asian, Black or Other community.<sup>26</sup>  
35  
36  
37  
38  
39

40 There are clear messages that need to be taken from this study relating to the under-  
41 recording of domestic abuse and childhood maltreatment in GP records. Although  
42 approaches and intervention have been implemented and evaluated to record both of these  
43 traumatic experiences, more needs to be done.<sup>24,34</sup> Healthcare professionals should be  
44 aware of the morbidity burden caused by such exposures and also the referral tools at their  
45 disposal highlighted in recent national guidelines.<sup>18,19</sup> Attempts to overcome barriers in  
46 asking about domestic abuse and childhood maltreatment such as the use of short question  
47 proformas are options to be trialled more broadly.<sup>49</sup> Although recording of domestic abuse  
48 and childhood maltreatment do not yet fall under the incentivised payment system for GPs,  
49 it should be strongly encouraged to improve our recording and implementation of  
50 appropriate referral mechanisms.<sup>50</sup> Although this study was unable to explore the reasons  
51 for under-recording by GPs, there is substantial literature on reasons for the under-  
52 recording and under-reporting of maltreatment and abuse summarised in a recent review.<sup>51</sup>  
53 Factors refer to either challenges in the recognition or reporting of maltreatment and  
54 abuse. Variables which may affect recognition include experience and knowledge levels of  
55 the treating clinician or variation in the threshold between clinicians as to what is  
56 reasonable suspicion of maltreatment or abuse.<sup>51,52</sup> Additionally, factors which affect the  
57  
58  
59  
60

1  
2  
3 clinician reporting the maltreatment or abuse include; 1) knowledge of the family; 2)  
4 expected negative outcomes of reporting to child-protection services; 3) lack of confidence  
5 that reporting would improve patient outcomes and 4) damage to the patient-clinician  
6 relationship.<sup>51</sup> Therefore, education approaches going beyond data improvement and  
7 screening are needed to improve not only recognition but reporting practices.  
8  
9

### 10 11 12 13 **Strengths and limitations**

14 Although our data are derived from a large population-based cohort, the results  
15 demonstrate substantial under-recording of childhood maltreatment and domestic abuse.  
16 Therefore, our results are likely to underestimate the burden of childhood maltreatment  
17 and domestic abuse by GPs. The increasing trends in IR and prevalence suggest that  
18 recording is improving and with the introduction of national guidelines and standards, this  
19 will continue to improve.<sup>18,19</sup> Before this dataset can be used for surveillance purposes or  
20 tracking of long term trends in childhood maltreatment or domestic abuse, there need to be  
21 further improvements in the rate or recording and reporting. Although this study was not  
22 designed to assess the impact of public policy or media attention at certain time points, it is  
23 also possible that spikes in IR seen in the dataset such as in 2012-2013 in the childhood  
24 maltreatment cohort may be related to high profile news events such as the exposure of  
25 Jimmy Savile which was shown to result in an increase of reports of childhood maltreatment  
26 to UK statutory bodies.<sup>53</sup> Additionally, as time progress it may be possible to conduct an  
27 interrupted time series analysis to assess the impact of changes in the NICE guidance and  
28 whether this has led to improved recording and reporting.  
29  
30  
31  
32

33 It is also important to note that the reliability of the findings are largely reliant on the  
34 accuracy of the coding practices by the GP. As seen in this study, there are a wide variety of  
35 codes relating to childhood maltreatment and domestic abuse. It is possible that  
36 information relating to maltreatment and abuse is included in the free-text narrative during  
37 clinical consultation which is not accessible. Therefore, we advise that in future studies, that  
38 where possible, free text analysis is conducted on clinical records to assess if this increases  
39 the number of reported cases.  
40  
41  
42

43 In our IR subgroup analysis, we also have limitations in the recorded ethnicity of patients  
44 (highlighted in table 1). Ethnicity recording has historically been poor, although improving in  
45 primary care data, with missing rates of around 50%.<sup>54</sup> Therefore, future research should  
46 aim to explore the IR of these outcomes in other cohorts which have utilised similar UK  
47 census categories for ethnicity. Another approach in future analyses, is if the dataset  
48 provides information on linked family members, it may be possible to infer the ethnicity if  
49 missing data is present.  
50  
51

### 52 53 **Conclusion**

54 In conclusion, our study showed an in-depth exploration of the incidence rate and  
55 prevalence trends of childhood maltreatment and domestic abuse using UK primary care  
56 records. It is clear that there is a severe under-reporting of both of these important  
57 exposures which relate to substantial morbidity and mortality burdens. Therefore,  
58  
59  
60



1  
2  
3 approaches to improve recording of abuse and strategies to detect and prevent negative  
4 consequences of childhood maltreatment and domestic abuse should be implemented.  
5  
6

#### 7 **Figure legends:**

8  
9 **Figure 1:** The incidence rate of childhood maltreatment broken down by sex, age,  
10 deprivation and ethnicity  
11

12  
13 **Figure 2:** Prevalence of childhood maltreatment: 1997-2017  
14

15 **Figure 3:** The incidence rate of domestic abuse broken down by age, deprivation and  
16 ethnicity  
17

18  
19 **Figure 4:** Prevalence of domestic abuse: 2005-2017  
20

#### 21 **Acknowledgements**

22  
23 The study team would like to thank Ms Anuradhaa Subramanian for her support with the  
24 statistical analysis. The team would also like to thank the University of Birmingham for  
25 supporting the open access fees.  
26

#### 27 **Data statement**

28  
29 The original data can be requested from the study team. However, ethics approval may  
30 need to be sought by the data provider prior to release of data.  
31

#### 32 **Author contributions**

33  
34 This study contributed to the PhD thesis for the main author JSC. JSC, JT, SB and KN were  
35 responsible for initial conception of the study. JSC and KG were responsible for data  
36 extraction, analysis and first draft of the manuscript. All authors were then involved in  
37 critical discussion of the draft. The final manuscript was authorised by all the authors with JT  
38 providing expert knowledge on childhood maltreatment, CBJ provided expertise on  
39 domestic abuse whereas SB and KN provided methodological expertise. All authors agree to  
40 be accountable for all aspects of the work.  
41  
42

#### 43 **Funding**

44  
45 There is no funding to declare in this study.  
46

#### 47 **Declaration of Interests**

48  
49 All authors have completed the ICMJE uniform disclosure form  
50 at [www.icmje.org/coi\\_disclosure.pdf](http://www.icmje.org/coi_disclosure.pdf) and declare: no support from any organisation for the  
51 submitted work, no financial relationships with any organisations that might have an  
52 interest in the submitted work in the previous three years, no other relationships or  
53 activities that could appear to have influenced the submitted work.  
54  
55

#### 56 **References**

57  
58  
59  
60

- 1 HM Government. Working Together to Safeguard Children: A guide to inter-agency working to safeguard and promote the welfare of children. 2018[https://assets.publishing.service.gov.uk/government/uploads/system/uploads/attachment\\_data/file/722305/Working\\_Together\\_to\\_Safeguard\\_Children\\_-\\_Guide.pdf](https://assets.publishing.service.gov.uk/government/uploads/system/uploads/attachment_data/file/722305/Working_Together_to_Safeguard_Children_-_Guide.pdf) (accessed 11 Jul2018).
- 2 HM Government. Guidance: Domestic violence and abuse. UK Gov. 2016.<https://www.gov.uk/guidance/domestic-violence-and-abuse#domestic-violence-and-abuse-new-definition> (accessed 19 Feb2018).
- 3 Bellis MA, Hughes K, Ford K, Ramos Rodriguez G, Sethi D, Passmore J. Life course health consequences and associated annual costs of adverse childhood experiences across Europe and North America: a systematic review and meta-analysis. *Lancet Public Heal* 2019; **0**. doi:10.1016/S2468-2667(19)30145-8.
- 4 Gilbert R, Widom CS, Browne K, Fergusson D, Webb E, Janson S. Burden and consequences of child maltreatment in high-income countries. *Lancet* 2009; **373**: 68–81.
- 5 Bacchus LJ, Ranganathan M, Watts C, Devries K. Recent intimate partner violence against women and health: a systematic review and meta-analysis of cohort studies. *BMJ Open* 2018; **8**: e019995.
- 6 Krug EG, Dahlberg LL, Mercy JA, Zwi AB, Lozano R. World report on violence and health. [http://apps.who.int/iris/bitstream/handle/10665/42495/9241545615\\_eng.pdf;jsessionid=38974668595BA31895E557DC1CB1EFEC?sequence=1](http://apps.who.int/iris/bitstream/handle/10665/42495/9241545615_eng.pdf;jsessionid=38974668595BA31895E557DC1CB1EFEC?sequence=1) (accessed 4 Jul2018).
- 7 Chandan JS, Thomas T, Bradbury-Jones C, Russell R, Bandyopadhyay S, Nirantharakumar K *et al*. Female survivors of intimate partner violence and risk of depression, anxiety and serious mental illness. *Br J Psychiatry* 2019; : 1–6.
- 8 Chandan JS, Thomas T, Raza K, Bradbury-Jones C, Taylor J, Bandyopadhyay S *et al*. Intimate Partner Violence and the Risk of Developing Fibromyalgia and Chronic Fatigue Syndrome. *J Interpers Violence* 2019; : 088626051988851.
- 9 Chandan JS, Thomas T, Gokhale KM, Bandyopadhyay S, Taylor J, Nirantharakumar K. The burden of mental ill health associated with childhood maltreatment in the UK, using The Health Improvement Network database: a population-based retrospective cohort study. *The Lancet Psychiatry* 2019; **6**: 926–934.
- 10 Chandan JS, Thomas T, Bradbury-Jones C, Taylor J, Bandyopadhyay S, Nirantharakumar K. Intimate partner violence and temporomandibular joint disorder. *J Dent* 2019; **82**: 98–100.
- 11 Chandan JS, Thomas T, Bradbury-Jones C, Taylor J, Bandyopadhyay S, Nirantharakumar K. Risk of Cardiometabolic Disease and All-Cause Mortality in Female Survivors of Domestic Abuse. *J Am Heart Assoc* 2020; **9**: e014580.
- 12 World Health Organization. The public health approach. WHO. 2011.[http://www.who.int/violenceprevention/approach/public\\_health/en/](http://www.who.int/violenceprevention/approach/public_health/en/) (accessed 8 Nov2018).
- 13 Overstreet NM, Quinn DM. The Intimate Partner Violence Stigmatization Model and Barriers to Help-Seeking. *Basic Appl Soc Psych* 2013; **35**: 109–122.
- 14 Allnock D, Miller P. No one noticed no one heard report. 2013.<https://pdfs.semanticscholar.org/7258/5fbc2269c865ac7c42aaf0e4bec5224a938b.pdf> (accessed 29 Jul2019).

- 1  
2  
3  
4  
5  
6  
7  
8  
9  
10  
11  
12  
13  
14  
15  
16  
17  
18  
19  
20  
21  
22  
23  
24  
25  
26  
27  
28  
29  
30  
31  
32  
33  
34  
35  
36  
37  
38  
39  
40  
41  
42  
43  
44  
45  
46  
47  
48  
49  
50  
51  
52  
53  
54  
55  
56  
57  
58  
59  
60
- 15 Smith CS. Coping Strategies of Female Victims of Child Abuse in Treatment for Substance Abuse Relapse: Their Advice to Other Women and Healthcare Professionals. *J Addict Nurs* 2007; **18**: 75–80.
- 16 Robinson L, Spilsbury K. Systematic review of the perceptions and experiences of accessing health services by adult victims of domestic violence. *Health Soc Care Community* 2007; **16**: 16–30.
- 17 Taket A. Responding to domestic violence in primary care. *BMJ* 2012; **344**: e757.
- 18 NICE. Overview | Child abuse and neglect | Guidance | NICE. 2017.<https://www.nice.org.uk/guidance/ng76> (accessed 16 Dec2019).
- 19 NICE. Overview | Domestic violence and abuse | Quality standards | NICE. 2016.<https://www.nice.org.uk/guidance/qs116> (accessed 16 Dec2019).
- 20 Parish E. Who should we blame for the death of Baby P? *BMJ* 2014; **349**: g6643.
- 21 STAFFORDSHIRE & STOKE-ON-TRENT SAFEGUARDING CHILDREN BOARDS. LESSONS TO BE LEARNED BRIEFING NO. 16: IN RESPECT OF THE DEATH OF DANIEL PELKA. 2013<https://www.staffordbc.gov.uk/sites/default/files/cme/DocMan1/PolicyAndImprovement/Serious--Case-Review---Daniel-Pelka.pdf> (accessed 16 Dec2019).
- 22 Department for Education. Investigations relating to Jimmy Savile - GOV.UK. 2015<https://www.gov.uk/government/publications/investigations-relating-to-jimmy-savile> (accessed 16 Dec2019).
- 23 UK Parliament. Domestic Abuse Bill 2017-19. 2017.<https://services.parliament.uk/bills/2017-19/domesticabuse.html> (accessed 16 Dec2019).
- 24 Feder G, Davies RA, Baird K, Dunne D, Eldridge S, Griffiths C *et al*. Identification and Referral to Improve Safety (IRIS) of women experiencing domestic violence with a primary care training and support programme: a cluster randomised controlled trial. *Lancet* 2011; **378**: 1788–1795.
- 25 Public Health England. Public Health Profiles domestic abuse. 2018.<https://fingertips.phe.org.uk/search/DomesticAbuse#page/4/gid/1/pat/6/par/E12000004/ati/102/are/E06000015/iid/92863/age/164/sex/4> (accessed 16 Dec2019).
- 26 Office for national statistics. Domestic abuse in England and Wales: year ending March 2018. 2018.<https://www.ons.gov.uk/peoplepopulationandcommunity/crimeandjustice/bulletins/domesticabuseinenglandandwales/yearendingmarch2018#prevalence-of-domestic-abuse>.
- 27 Olive P. Intimate partner violence and clinical coding: issues with the use of the International Classification of Disease (ICD-10) in England. *J Health Serv Res Policy* 2018; **23**: 212–221.
- 28 Degli Esposti M, Humphreys DK, Jenkins BM, Gasparrini A, Pooley S, Eisner M *et al*. Long-term trends in child maltreatment in England and Wales, 1858-2016: an observational, time-series analysis. *Lancet Public Heal* 2019; **4**: e148–e158.
- 29 Office for National Statistics. Abuse during childhood. 2016.<https://www.ons.gov.uk/peoplepopulationandcommunity/crimeandjustice/articles/abuseduringchildhood/findingsfromtheyearendingmarch2016crimesurveyforenglandandwales> (accessed 16 Dec2019).
- 30 Woodman J, Freemantle N, Allister J, de Lusignan S, Gilbert R, Petersen I. Variation in recorded child maltreatment concerns in UK primary care records: a cohort study

- 1  
2  
3 using The Health Improvement Network (THIN) database. *PLoS One* 2012; **7**: e49808.
- 4  
5 31 Grimm P. Social Desirability Bias. In: *Wiley International Encyclopedia of Marketing*.  
6 John Wiley & Sons, Ltd: Chichester, UK, 2010  
7 doi:10.1002/9781444316568.wiem02057.
- 8  
9 32 Drake B, Jonson-Reid M, Kim H. Surveillance Bias in Child Maltreatment: A Tempest in  
10 a Teapot. *Int J Environ Res Public Health* 2017; **14**. doi:10.3390/ijerph14090971.
- 11  
12 33 Blak BT, Thompson M, Dattani H, Bourke A. Generalisability of The Health  
13 Improvement Network (THIN) database: demographics, chronic disease prevalence  
14 and mortality rates. *Inform Prim Care* 2011; **19**: 251–5.
- 15  
16 34 McGovern A, van Vlymen J, Liyanage H, Jones S, de Lusignan S, Woodman J *et al*. A  
17 simple clinical coding strategy to improve recording of child maltreatment concerns:  
18 an audit study. *Br J Gen Pract* 2014; **64**: 389–90.
- 19  
20 35 Blak BT, Thompson M, Dattani H, Bourke A. Generalisability of The Health  
21 Improvement Network (THIN) database: demographics, chronic disease prevalence  
22 and mortality rates. *Inform Prim Care* 2011; **19**: 251–5.
- 23  
24 36 IQVIA. IQVIA Medical Research Data - Health Research Authority.  
25 2018.[https://www.hra.nhs.uk/planning-and-improving-research/application-](https://www.hra.nhs.uk/planning-and-improving-research/application-summaries/research-summaries/the-health-improvement-network-thin-database/)  
26 [summaries/research-summaries/the-health-improvement-network-thin-database/](https://www.hra.nhs.uk/planning-and-improving-research/application-summaries/research-summaries/the-health-improvement-network-thin-database/)  
27 (accessed 20 Aug2019).
- 28  
29 37 Booth N. What are the Read Codes? *Health Libr Rev* 1994; **11**: 177–82.
- 30  
31 38 Maguire A, Blak BT, Thompson M. The importance of defining periods of complete  
32 mortality reporting for research using automated data from primary care.  
33 *Pharmacoepidemiol Drug Saf* 2009; **18**: 76–83.
- 34  
35 39 Horsfall L, Walters K, Petersen I. Identifying periods of acceptable computer usage in  
36 primary care research databases. *Pharmacoepidemiol Drug Saf* 2013; **22**: 64–69.
- 37  
38 40 Chandan JS, Thomas T, Bradbury-Jones C, Taylor J, Bandyopadhyay S,  
39 Nirantharakumar K. Intimate partner violence and temporomandibular joint disorder.  
40 *J Dent* 2019; **82**: 98–100.
- 41  
42 41 Chandan JS, Thomas T, Raza K, Bandyopadhyay S, Nirantharakumar K, Taylor J.  
43 Association between child maltreatment and central sensitivity syndromes: A  
44 systematic review protocol. *BMJ Open*. 2019; **9**: bmjopen-2018-025436.
- 45  
46 42 Hughes K, Bellis MA, Hardcastle KA, Sethi D, Butchart A, Mikton C *et al*. The effect of  
47 multiple adverse childhood experiences on health: a systematic review and meta-  
48 analysis. *Lancet Public Heal* 2017; **2**: e356–e366.
- 49  
50 43 Department for Education. Children looked after in England including adoption: 2018  
51 to 2019 - GOV.UK. 2019.[https://www.gov.uk/government/statistics/children-looked-](https://www.gov.uk/government/statistics/children-looked-after-in-england-including-adoption-2018-to-2019)  
52 [after-in-england-including-adoption-2018-to-2019](https://www.gov.uk/government/statistics/children-looked-after-in-england-including-adoption-2018-to-2019) (accessed 15 Dec2019).
- 53  
54 44 Townsend P, Phillimore P, Beattie A. Health and deprivation: inequality and the  
55 North. 1988. *London Croom Helm Google Sch* 1988.
- 56  
57 45 Public Health England. Public Health Profiles Children subject to a child protection  
58 plan with initial category of abuse: rate per 10,000 children aged under 18.  
59 2019.[https://fingertips.phe.org.uk/search/child](https://fingertips.phe.org.uk/search/child-protection#page/4/gid/1/pat/6/par/E12000004/ati/102/are/E06000015/iid/92853/age/173/sex/4)  
60 [protection#page/4/gid/1/pat/6/par/E12000004/ati/102/are/E06000015/iid/92853/a](https://fingertips.phe.org.uk/search/child-protection#page/4/gid/1/pat/6/par/E12000004/ati/102/are/E06000015/iid/92853/age/173/sex/4)  
[ge/173/sex/4](https://fingertips.phe.org.uk/search/child-protection#page/4/gid/1/pat/6/par/E12000004/ati/102/are/E06000015/iid/92853/age/173/sex/4) (accessed 16 Dec2019).
- 46 Eldin Fahmy, Emma Williamson CP. Evidence and policy review: Domestic violence  
and poverty. 2016 doi:[https://research-](https://research-information.bris.ac.uk/en/publications/evidence-and-policy-review(af69c4ab-ff0b-)  
[information.bris.ac.uk/en/publications/evidence-and-policy-review\(af69c4ab-ff0b-](https://research-information.bris.ac.uk/en/publications/evidence-and-policy-review(af69c4ab-ff0b-)

- 1  
2  
3 4392-9318-890dc0fcc359).html.
- 4 47 Bywaters P, Bunting L, Davidson G, Hanratty J. The relationship between poverty,  
5 child abuse and neglect: an evidence review. 2016; : 74.
- 6 48 Owen C, Statham J. Disproportionality in child welfare : the prevalence of black and  
7 minority ethnic children within the 'looked after' and 'children in need' populations  
8 and on child protection registers in England.  
9 2009.[https://www.semanticscholar.org/paper/Disproportionality-in-child-welfare-](https://www.semanticscholar.org/paper/Disproportionality-in-child-welfare-%3A-the-of-black-Owen-Statham/c3bec39040bc3816b2bce4cde6e51dc05321996b)  
10 [%3A-the-of-black-Owen-Statham/c3bec39040bc3816b2bce4cde6e51dc05321996b](https://www.semanticscholar.org/paper/Disproportionality-in-child-welfare-%3A-the-of-black-Owen-Statham/c3bec39040bc3816b2bce4cde6e51dc05321996b)  
11 (accessed 16 Dec2019).
- 12 49 Gerbert B, Moe J, Caspers N, Salber P, Feldman M, Herzig K *et al*. Simplifying  
13 physicians' response to domestic violence. *West J Med* 2000; **172**: 329–31.
- 14 50 National Institute for Health and Care Excellence. Quality and Outcomes Framework  
15 Indicators - Standards & Indicators. 2016.[https://www.nice.org.uk/Standards-and-](https://www.nice.org.uk/Standards-and-Indicators/QOFIndicators)  
16 [Indicators/QOFIndicators](https://www.nice.org.uk/Standards-and-Indicators/QOFIndicators) (accessed 28 Jul2019).
- 17 51 Gilbert R, Kemp A, Thoburn J, Sidebotham P, Radford L, Glaser D *et al*. Recognising  
18 and responding to child maltreatment. *Lancet* 2009; **373**: 167–180.
- 19 52 Fraser JA, Mathews B, Walsh K, Chen L, Dunne M. Factors influencing child abuse and  
20 neglect recognition and reporting by nurses: A multivariate analysis. *Int J Nurs Stud*  
21 2010; **47**: 146–153.
- 22 53 NSPCC. Giving victims a voice.  
23 2013.[https://www.nspcc.org.uk/globalassets/documents/research-reports/yewtree-](https://www.nspcc.org.uk/globalassets/documents/research-reports/yewtree-report-giving-victims-voice-jimmy-savile.pdf)  
24 [report-giving-victims-voice-jimmy-savile.pdf](https://www.nspcc.org.uk/globalassets/documents/research-reports/yewtree-report-giving-victims-voice-jimmy-savile.pdf) (accessed 16 Dec2019).
- 25 54 Mathur R, Bhaskaran K, Chaturvedi N, Leon DA, vanStaa T, Grundy E *et al*.  
26 Completeness and usability of ethnicity data in UK-based primary care and hospital  
27 databases. *J Public Health (Oxf)* 2014; **36**: 684.
- 28  
29  
30  
31  
32  
33  
34  
35  
36  
37  
38  
39  
40  
41  
42  
43  
44  
45  
46  
47  
48  
49  
50  
51  
52  
53  
54  
55  
56  
57  
58  
59  
60

1  
2  
3  
4  
5  
6  
7  
8  
9  
10  
11  
12  
13  
14  
15  
16  
17  
18  
19  
20  
21  
22  
23  
24  
25  
26  
27  
28  
29  
30  
31  
32  
33  
34  
35  
36  
37  
38  
39  
40  
41  
42  
43  
44  
45  
46  
47  
48  
49  
50  
51  
52  
53  
54  
55  
56  
57  
58  
59  
60

For peer review only

**Table 1: Baseline characteristics of both the child and female adult cohort**

|                                | <b>Child cohort<br/>(Under 18 years)</b> |                                                          |                                | <b>Female adult<br/>cohort (Over 18<br/>years)</b> |                                              |                                | <b>Male adult<br/>cohort (Over 18<br/>years)</b> |                                              |
|--------------------------------|------------------------------------------|----------------------------------------------------------|--------------------------------|----------------------------------------------------|----------------------------------------------|--------------------------------|--------------------------------------------------|----------------------------------------------|
|                                | <b>Total cohort</b>                      | <b>Incident<br/>childhood<br/>maltreatment<br/>cases</b> |                                | <b>Total cohort</b>                                | <b>Incident<br/>domestic<br/>abuse cases</b> |                                | <b>Total cohort</b>                              | <b>Incident<br/>domestic<br/>abuse cases</b> |
| <b>Number of<br/>patients</b>  | 3045456                                  | 4603                                                     | <b>Number of<br/>patients</b>  | 4982781                                            | 5598                                         | <b>Number of<br/>patients</b>  | 4605963                                          | 325                                          |
| <b>Sex</b>                     |                                          |                                                          | <b>Sex</b>                     |                                                    |                                              | <b>Sex</b>                     |                                                  |                                              |
| Male                           | 1570986 (51.6%)                          | 2041 (44.3%)                                             |                                |                                                    |                                              | Male                           | 4605963<br>(100%)                                | 325 (100%)                                   |
| Female                         | 1474470 (48.4%)                          | 2562 (55.7%)                                             | Female                         | 4982781<br>(100%)                                  | 5598 (100%)                                  |                                |                                                  |                                              |
| <b>Age at cohort<br/>entry</b> |                                          |                                                          | <b>Age at<br/>cohort entry</b> |                                                    |                                              | <b>Age at<br/>cohort entry</b> |                                                  |                                              |
| 0-1 years                      | 1030637 (33.8%)                          | 1757 (38.2%)                                             | 18-24 years                    | 1211022<br>(24.3%)                                 | 1897 (33.9%)                                 | 18-24 years                    | 1042526<br>(22.6%)                               | 69 (21.2%)                                   |
| 1-4 years                      | 607294 (19.9%)                           | 1184 (25.7%)                                             | 25-34 years                    | 1138926<br>(22.9%)                                 | 1939 (34.6%)                                 | 25-34 years                    | 1042973<br>(22.6%)                               | 76 (23.4%)                                   |
| 5-9 years                      | 580306 (19.1%)                           | 886 (19.3%)                                              | 35-44 years                    | 777795 (15.6%)                                     | 1136 (20.3%)                                 | 35-44 years                    | 852692 (18.5%)                                   | 96 (29.5%)                                   |
| 10-15 years                    | 611693 (20.1%)                           | 672 (14.6%)                                              | 45-54 years                    | 596443 (12.0%)                                     | 411 (7.3%)                                   | 45-54 years                    | 632223 (13.7%)                                   | 43 (13.2%)                                   |
| 16-17 years                    | 215526 (7.1%)                            | 104 (2.3%)                                               | 55-64 years                    | 470107 (9.4%)                                      | 145 (2.6%)                                   | 55-64 years                    | 468772 (10.2%)                                   | 23 (7.1%)                                    |
|                                |                                          |                                                          | 65+ years                      | 788488 (15.8%)                                     | 70 (1.3%)                                    | 65+ years                      | 566767 (12.3%)                                   | 18 (5.5%)                                    |
| <b>Ethnicity</b>               |                                          |                                                          | <b>Ethnicity</b>               |                                                    |                                              | <b>Ethnicity</b>               |                                                  |                                              |
| White                          | 1089894 (35.8%)                          | 1854 (40.3%)                                             | White                          | 2017299<br>(40.5%)                                 | 2905 (51.9%)                                 | White                          | 1733115<br>(37.6%)                               | 162 (49.9%)                                  |

1  
2  
3  
4  
5  
6  
7  
8  
9  
10  
11  
12  
13  
14  
15  
16  
17  
18  
19  
20  
21  
22  
23  
24  
25  
26  
27  
28  
29  
30  
31  
32  
33  
34  
35  
36  
37  
38  
39  
40  
41  
42  
43  
44  
45  
46

|                                   |                 |              |                                   |                 |              |                                   |                 |             |
|-----------------------------------|-----------------|--------------|-----------------------------------|-----------------|--------------|-----------------------------------|-----------------|-------------|
| Mixed race                        | 31067 (1.0%)    | 26 (0.6%)    | Mixed race                        | 69270 (1.4%)    | 99 (1.8%)    | Mixed race                        | 52952 (1.2%)    | 3 (0.9%)    |
| Black                             | 63244 (2.1%)    | 135 (2.9%)   | Black                             | 80974 (1.6%)    | 212 (3.8%)   | Black                             | 67232 (1.5%)    | 9 (2.8%)    |
| South Asian                       | 80486 (2.6%)    | 145 (3.2%)   | South Asian                       | 109117 (2.2%)   | 374 (6.7%)   | South Asian                       | 115324 (2.5%)   | 21 (6.5%)   |
| Others                            | 37318 (1.2%)    | 82 (1.8%)    | Others                            | 27071 (0.5%)    | 87 (1.6%)    | Others                            | 21291 (0.5%)    | 4 (1.2%)    |
| Missing                           | 1743447 (57.3%) | 2361 (51.3%) | Missing                           | 2679050 (53.8%) | 1921 (32.3%) | Missing                           | 2616039 (56.8%) | 126 (38.8%) |
| <b>Townsend Deprivation Index</b> |                 |              | <b>Townsend Deprivation Index</b> |                 |              | <b>Townsend Deprivation Index</b> |                 |             |
| 1 (Least deprived)                | 536645 (17.6%)  | 378 (8.2%)   | 1 (Least deprived)                | 9107759 (18.3%) | 614 (11.0%)  | 1 (Least deprived)                | 856406 (18.6%)  | 55 (16.9%)  |
| 2                                 | 482613 (15.9%)  | 418 (9.1%)   | 2                                 | 848614 (17.0%)  | 664 (11.9%)  | 2                                 | 785170 (17.1%)  | 42 (12.9%)  |
| 3                                 | 538247 (17.7%)  | 729 (15.8%)  | 3                                 | 904034 (18.1%)  | 959 (17.1%)  | 3                                 | 832270 (18.1%)  | 65 (20.0%)  |
| 4                                 | 524151 (17.2%)  | 1080 (23.5%) | 4                                 | 849248 (17.0%)  | 1225 (21.9%) | 4                                 | 582622 (12.7%)  | 66 (20.3%)  |
| 5 (Most deprived)                 | 410246 (13.5%)  | 1279 (27.8%) | 5 (Most deprived)                 | 612744 (12.3%)  | 1322 (23.6%) | 5 (Most deprived)                 | 582622 (12.7%)  | 55 (16.9%)  |
| Missing                           | 553554 (18.2%)  | 719 (15.6%)  | Missing                           | 857382 (17.2%)  | 814 (14.5%)  | Missing                           | 774144 (16.8%)  | 42 (12.9%)  |



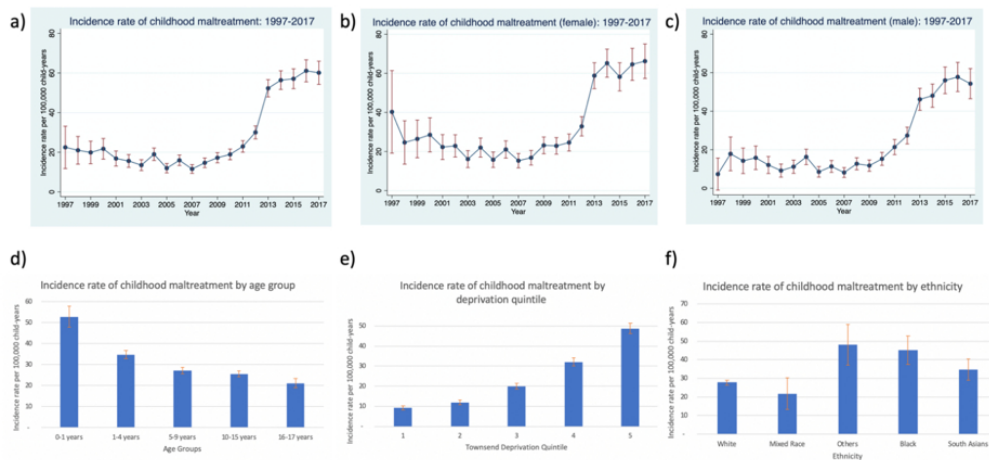

The incidence rate of childhood maltreatment broken down by sex, age, deprivation and ethnicity

1  
2  
3  
4  
5  
6  
7  
8  
9  
10  
11  
12  
13  
14  
15  
16  
17  
18  
19  
20  
21  
22  
23  
24  
25  
26  
27  
28  
29  
30  
31  
32  
33  
34  
35  
36  
37  
38  
39  
40  
41  
42  
43  
44  
45  
46  
47  
48  
49  
50  
51  
52  
53  
54  
55  
56  
57  
58  
59  
60

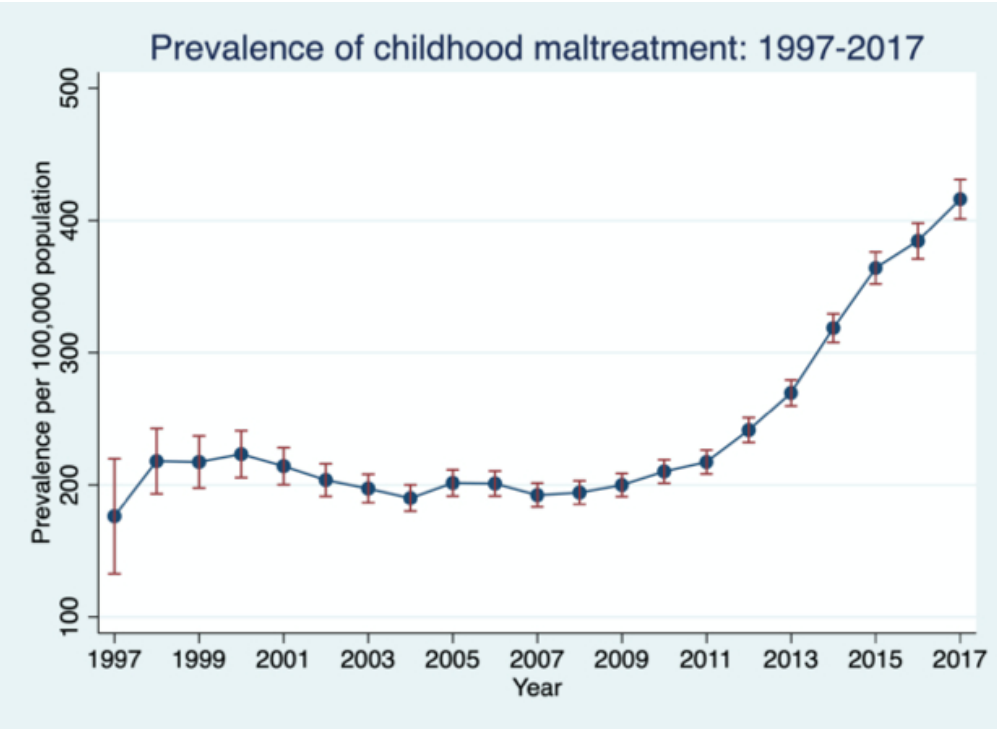

Prevalence of childhood maltreatment: 1997-2017

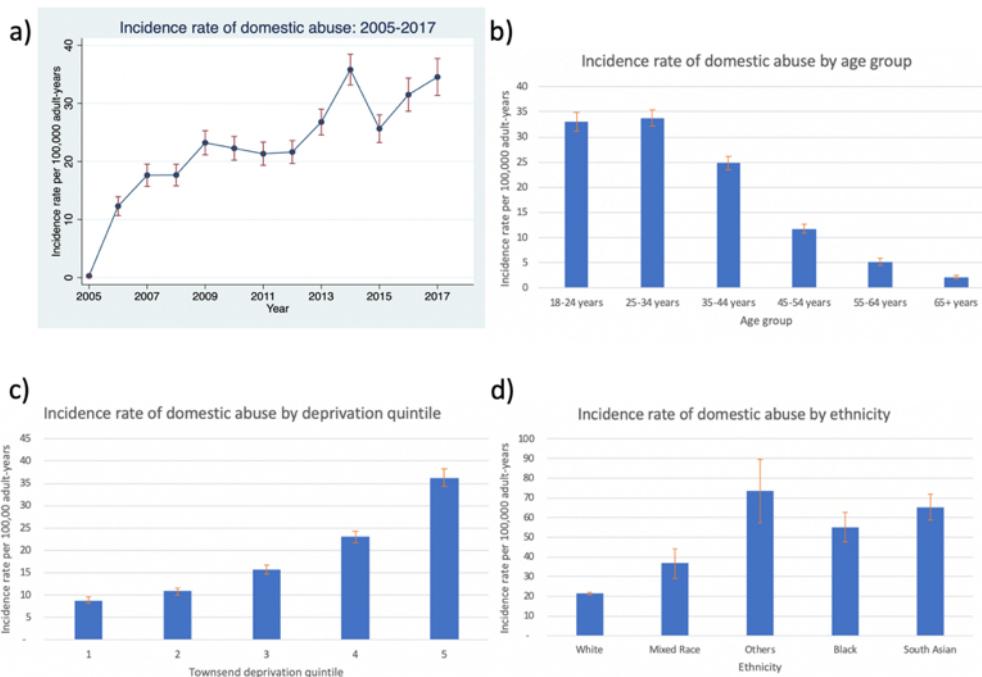

The incidence rate of domestic abuse broken down by age, deprivation and ethnicity

1  
2  
3  
4  
5  
6  
7  
8  
9  
10  
11  
12  
13  
14  
15  
16  
17  
18  
19  
20  
21  
22  
23  
24  
25  
26  
27  
28  
29  
30  
31  
32  
33  
34  
35  
36  
37  
38  
39  
40  
41  
42  
43  
44  
45  
46  
47  
48  
49  
50  
51  
52  
53  
54  
55  
56  
57  
58  
59  
60



Prevalence of domestic abuse: 2005-2017

# Supplementary

## Table of Contents

|                                                                                                                  |           |
|------------------------------------------------------------------------------------------------------------------|-----------|
| <b>Supplementary.....</b>                                                                                        | <b>1</b>  |
| <b>Read code lists .....</b>                                                                                     | <b>2</b>  |
| <b>Supplementary table 1: Annual incidence rate of domestic abuse in men between 2005-2017.....</b>              | <b>8</b>  |
| <b>Supplementary table 2: Prevalence of domestic abuse in men between 2005-2017 .....</b>                        | <b>9</b>  |
| <b>Supplementary table 3: Annual incidence rate of childhood maltreatment between 1996-2017</b>                  | <b>10</b> |
| <b>Supplementary table 4: Incidence rate of childhood maltreatment in females between 1996-2017 .....</b>        | <b>11</b> |
| <b>Supplementary table 5: Incidence rate of childhood maltreatment in males between 1996-2017 .....</b>          | <b>12</b> |
| <b>Supplementary table 6: Incidence rate of childhood maltreatment per age group .....</b>                       | <b>13</b> |
| <b>Supplementary table 7: Incidence rate of childhood maltreatment per deprivation quintile .....</b>            | <b>14</b> |
| <b>Supplementary table 8: Incidence rate of childhood maltreatment per ethnic group .....</b>                    | <b>15</b> |
| <b>Supplementary table 9: Prevalence of childhood maltreatment: 1996-2017 .....</b>                              | <b>16</b> |
| <b>Supplementary table 10: Regression model describing the risk of experiencing childhood maltreatment.....</b>  | <b>17</b> |
| <b>Supplementary table 11: Annual incidence rate of domestic abuse between 1996-2017 .....</b>                   | <b>18</b> |
| <b>Supplementary table 12: Incidence rate of domestic abuse per age group.....</b>                               | <b>19</b> |
| <b>Supplementary table 13: Incidence rate of domestic abuse per deprivation quintile .....</b>                   | <b>20</b> |
| <b>Supplementary table 14: Incidence rate of domestic abuse per ethnic group .....</b>                           | <b>21</b> |
| <b>Supplementary table 15: Prevalence of domestic abuse between 1996-2017.....</b>                               | <b>22</b> |
| <b>Supplementary table 16: Regression model describing the risk of experiencing domestic abuse in women.....</b> | <b>23</b> |

1  
2  
3  
4  
5  
6  
7  
8  
9  
10  
11  
12  
13  
14  
15  
16  
17  
18  
19  
20  
21  
22  
23  
24  
25  
26  
27  
28  
29  
30  
31  
32  
33  
34  
35  
36  
37  
38  
39  
40  
41  
42  
43  
44  
45  
46  
47  
48  
49  
50  
51  
52  
53  
54  
55  
56  
57  
58  
59  
60

## Read code lists

### Childhood maltreatment- Incident only codes

| Code    | Description                                                  |
|---------|--------------------------------------------------------------|
| 13lh.00 | Subject to supervision order under Children Act 1989         |
| 13li.00 | Child deserted by parents                                    |
| 13li.00 | Subject to care order under Children Act 1989                |
| 13li.11 | Child deserted by mother                                     |
| 13li000 | Subject to care order under section 20 of Children Act 1989  |
| 13li100 | Subject to care order under section 21 of Children Act 1989  |
| 13li200 | Subject to care order under section 25 of Children Act 1989  |
| 13li300 | Subject to care order under section 31 of Children Act 1989  |
| 13lj.00 | Subject to interim care order under Children Act 1989        |
| 13lj000 | Sub to interim care order under section 38 Children Act 1989 |
| 13lj100 | Emergency protective order section 44 Children Act 1989      |
| 13W3.00 | Child abuse in family                                        |
| 13W4.00 | Parent/child conflict                                        |
| 13W4000 | Child/parent violence                                        |
| 13WT.00 | Child protection observation                                 |
| 13WT000 | Child protection category                                    |
| 13WT100 | Child protection category emotional                          |
| 13WT200 | Child protection category physical                           |
| 13WT300 | Child protection category sexual                             |
| 13WT400 | Child protection category neglect                            |
| 14X5.00 | Victim of physical abuse                                     |
| 14X6.00 | Victim of sexual abuse                                       |
| 14X6000 | Victim of sexual harassment                                  |
| 14X7.00 | Victim of emotional abuse                                    |
| 14X8.00 | Victim of domestic violence                                  |
| 14XF.00 | Victim of human trafficking                                  |
| 14XG.00 | Victim of domestic abuse                                     |
| 14XH.00 | Victim of child sexual exploitation                          |
| 14XJ.00 | Victim of psychological abuse                                |
| 14XK.00 | Victim of financial abuse                                    |
| 14XP.00 | Victim of discriminatory abuse                               |

|    |         |                                                              |
|----|---------|--------------------------------------------------------------|
| 1  | 14XR.00 | Victim neglect & acts omission                               |
| 2  | 222R.00 | Neglected appearance                                         |
| 3  | R037.00 | [D]Insufficient intake of food and water due to self neglect |
| 4  | R2y3.11 | [D] Self neglect                                             |
| 5  | Ry18.00 | [D]Self neglect                                              |
| 6  | SN42000 | Deprivation of food, unspecified                             |
| 7  | SN43000 | Deprivation of water                                         |
| 8  | SN55.00 | Child maltreatment syndrome                                  |
| 9  | SN55000 | Emotional maltreatment of child                              |
| 10 | SN55011 | Emotional deprivation of child                               |
| 11 | SN55012 | Emotional abuse of child                                     |
| 12 | SN55100 | Nutritional maltreatment of child                            |
| 13 | SN55111 | Nutritional deprivation of child                             |
| 14 | SN55112 | Malnutrition in child maltreatment syndrome                  |
| 15 | SN55200 | Non-accidental injury to child                               |
| 16 | SN55211 | NAI - non-accidental injury to child                         |
| 17 | SN55212 | Physical injury to child                                     |
| 18 | SN55300 | Battered baby or child syndrome NOS                          |
| 19 | SN55311 | Battered baby syndrome NOS                                   |
| 20 | SN55312 | Battered child syndrome NOS                                  |
| 21 | SN55400 | Multiple deprivation of child                                |
| 22 | SN55500 | Physical abuse of child                                      |
| 23 | SN55600 | Non-accidental traumatic head injury to child                |
| 24 | SN55z00 | Child maltreatment syndrome NOS                              |
| 25 | SN55z11 | Child abuse NEC                                              |
| 26 | SN55z12 | Child deprivation syndrome                                   |
| 27 | SN55z13 | Neglect affecting child NEC                                  |
| 28 | SN56000 | Battered person unspecified, syndrome                        |
| 29 | SN57.00 | Maltreatment syndromes                                       |
| 30 | SN57000 | Neglect or abandonment                                       |
| 31 | SN57100 | Sexual abuse                                                 |
| 32 | SN57200 | Child affected by Munchausen's by proxy                      |
| 33 | SyuH500 | [X]Other maltreatment syndromes                              |
| 34 | TE40.00 | Accidents due to abandonment or neglect of helpless person   |
| 35 | TL7..00 | Child battering and other maltreatment                       |
| 36 | TL70.00 | Child battering or other maltreatment by parent              |
| 37 | TL7y.00 | Child battering or other maltreatment by other spec person   |
| 38 | TL7z.00 | Child battering or other maltreatment by person NOS          |
| 39 | TLx4.00 | Assault by criminal neglect                                  |
| 40 | U3M..00 | [X]Neglect and abandonment                                   |
| 41 | U3M0.00 | [X]Neglect and abandonment, by spouse or partner             |
| 42 | U3M1.00 | [X]Neglect and abandonment, by parent                        |
| 43 | U3M2.00 | [X]Neglect and abandonment, by acquaintance or friend        |
| 44 | U3My.00 | [X]Neglect and abandonment, by other specified persons       |
| 45 | U3Mz.00 | [X]Neglect and abandonment, by unspecified person            |

|    |         |                                                             |
|----|---------|-------------------------------------------------------------|
| 1  | U3N..00 | [X]Other maltreatment syndromes                             |
| 2  | U3N0.00 | [X]Other maltreatment syndromes, by spouse or partner       |
| 3  | U3N1.00 | [X]Other maltreatment syndromes, by parent                  |
| 4  | U3N2.00 | [X]Other maltreatment syndromes, by acquaintance or friend  |
| 5  | U3N3.00 | [X]Other maltreatment syndromes, by official authorities    |
| 6  | U3Ny.00 | [X]Other maltreatment syndromes, by other specified persons |
| 7  | U3Nz.00 | [X]Other maltreatment syndromes, by unspecified person      |
| 8  | U3P..00 | [X]Maltreatment                                             |
| 9  | U3P0.00 | [X]Maltreatment, by spouse or partner                       |
| 10 | U3P1.00 | [X]Maltreatment, by parent                                  |
| 11 | U3P2.00 | [X]Maltreatment, by acquaintance or friend                  |
| 12 | Z352.11 | Child abuse investigation                                   |
| 13 | Z787.00 | Self-neglect                                                |
| 14 | Z787200 | Neglect of clothes                                          |
| 15 | Z787400 | Neglect of personal hygiene                                 |
| 16 | Z787500 | Neglect of physical health                                  |
| 17 | Z787600 | Neglect of dental care                                      |
| 18 | Z787700 | Neglect of physical illness                                 |
| 19 | Z787800 | Neglect of common dangers                                   |
| 20 | ZV1B400 | [V]Personal history of neglect                              |
| 21 | ZV4H300 | [V]Emotional neglect of child                               |
| 22 | ZV4H400 | [V]Other problems related to neglect in upbringing          |
| 23 | ZV61200 | [V]Child abuse                                              |
| 24 | ZV61211 | [V]Child battering                                          |
| 25 | ZV61212 | [V]Child neglect                                            |
| 26 | ZV61213 | [V]Parent - child conflict                                  |
| 27 | ZVu4B00 | [X]Other problems related to neglect in upbringing          |

### Childhood maltreatment- Prevalent codes

| Code    | Description                                                  |
|---------|--------------------------------------------------------------|
| 6254.00 | A/N care: H/O child abuse                                    |
| 13lh.00 | Subject to supervision order under Children Act 1989         |
| 13li.00 | Child deserted by parents                                    |
| 13li.00 | Subject to care order under Children Act 1989                |
| 13li.11 | Child deserted by mother                                     |
| 13li000 | Subject to care order under section 20 of Children Act 1989  |
| 13li100 | Subject to care order under section 21 of Children Act 1989  |
| 13li200 | Subject to care order under section 25 of Children Act 1989  |
| 13li300 | Subject to care order under section 31 of Children Act 1989  |
| 13lj.00 | Subject to interim care order under Children Act 1989        |
| 13lj000 | Sub to interim care order under section 38 Children Act 1989 |
| 13lj100 | Emergency protective order section 44 Children Act 1989      |
| 13W3.00 | Child abuse in family                                        |
| 13W4.00 | Parent/child conflict                                        |



|    |         |                                                              |
|----|---------|--------------------------------------------------------------|
| 1  | 13W4000 | Child/parent violence                                        |
| 2  | 13WT.00 | Child protection observation                                 |
| 3  | 13WT000 | Child protection category                                    |
| 4  | 13WT100 | Child protection category emotional                          |
| 5  | 13WT200 | Child protection category physical                           |
| 6  | 13WT300 | Child protection category sexual                             |
| 7  | 13WT400 | Child protection category neglect                            |
| 8  | 14X..00 | History of abuse                                             |
| 9  | 14X0.00 | History of physical abuse                                    |
| 10 | 14X1.00 | History of sexual abuse                                      |
| 11 | 14X2.00 | History of emotional abuse                                   |
| 12 | 14X3.00 | History of domestic violence                                 |
| 13 | 14X5.00 | Victim of physical abuse                                     |
| 14 | 14X6.00 | Victim of sexual abuse                                       |
| 15 | 14X6000 | Victim of sexual harassment                                  |
| 16 | 14X7.00 | Victim of emotional abuse                                    |
| 17 | 14X8.00 | Victim of domestic violence                                  |
| 18 | 14XD.00 | History of domestic abuse                                    |
| 19 | 14XD000 | H/O domestic emotional abuse                                 |
| 20 | 14XD100 | H/O domestic physical abuse                                  |
| 21 | 14XD200 | H/O domestic sexual abuse                                    |
| 22 | 14XE.00 | History of being victim of domestic violence                 |
| 23 | 14XF.00 | Victim of human trafficking                                  |
| 24 | 14XG.00 | Victim of domestic abuse                                     |
| 25 | 14XH.00 | Victim of child sexual exploitation                          |
| 26 | 14XJ.00 | Victim of psychological abuse                                |
| 27 | 14XK.00 | Victim of financial abuse                                    |
| 28 | 14XP.00 | Victim of discriminatory abuse                               |
| 29 | 14XR.00 | Victim neglect & acts omission                               |
| 30 | 222R.00 | Neglected appearance                                         |
| 31 | R037.00 | [D]Insufficient intake of food and water due to self neglect |
| 32 | R2y3.11 | [D] Self neglect                                             |
| 33 | Ry18.00 | [D]Self neglect                                              |
| 34 | SN42000 | Deprivation of food, unspecified                             |
| 35 | SN43000 | Deprivation of water                                         |
| 36 | SN55.00 | Child maltreatment syndrome                                  |
| 37 | SN55000 | Emotional maltreatment of child                              |
| 38 | SN55011 | Emotional deprivation of child                               |
| 39 | SN55012 | Emotional abuse of child                                     |
| 40 | SN55100 | Nutritional maltreatment of child                            |
| 41 | SN55111 | Nutritional deprivation of child                             |
| 42 | SN55112 | Malnutrition in child maltreatment syndrome                  |
| 43 | SN55200 | Non-accidental injury to child                               |
| 44 | SN55211 | NAI - non-accidental injury to child                         |
| 45 | SN55212 | Physical injury to child                                     |

|    |         |                                                             |
|----|---------|-------------------------------------------------------------|
| 1  | SN55300 | Battered baby or child syndrome NOS                         |
| 2  | SN55311 | Battered baby syndrome NOS                                  |
| 3  | SN55312 | Battered child syndrome NOS                                 |
| 4  | SN55400 | Multiple deprivation of child                               |
| 5  | SN55500 | Physical abuse of child                                     |
| 6  | SN55600 | Non-accidental traumatic head injury to child               |
| 7  | SN55z00 | Child maltreatment syndrome NOS                             |
| 8  | SN55z11 | Child abuse NEC                                             |
| 9  | SN55z12 | Child deprivation syndrome                                  |
| 10 | SN55z13 | Neglect affecting child NEC                                 |
| 11 | SN56000 | Battered person unspecified, syndrome                       |
| 12 | SN57.00 | Maltreatment syndromes                                      |
| 13 | SN57000 | Neglect or abandonment                                      |
| 14 | SN57100 | Sexual abuse                                                |
| 15 | SN57200 | Child affected by Munchausen's by proxy                     |
| 16 | SyuH500 | [X]Other maltreatment syndromes                             |
| 17 | TE40.00 | Accidents due to abandonment or neglect of helpless person  |
| 18 | TL7..00 | Child battering and other maltreatment                      |
| 19 | TL70.00 | Child battering or other maltreatment by parent             |
| 20 | TL7y.00 | Child battering or other maltreatment by other spec person  |
| 21 | TL7z.00 | Child battering or other maltreatment by person NOS         |
| 22 | TLx4.00 | Assault by criminal neglect                                 |
| 23 | U3M..00 | [X]Neglect and abandonment                                  |
| 24 | U3M0.00 | [X]Neglect and abandonment, by spouse or partner            |
| 25 | U3M1.00 | [X]Neglect and abandonment, by parent                       |
| 26 | U3M2.00 | [X]Neglect and abandonment, by acquaintance or friend       |
| 27 | U3My.00 | [X]Neglect and abandonment, by other specified persons      |
| 28 | U3Mz.00 | [X]Neglect and abandonment, by unspecified person           |
| 29 | U3N..00 | [X]Other maltreatment syndromes                             |
| 30 | U3N0.00 | [X]Other maltreatment syndromes, by spouse or partner       |
| 31 | U3N1.00 | [X]Other maltreatment syndromes, by parent                  |
| 32 | U3N2.00 | [X]Other maltreatment syndromes, by acquaintance or friend  |
| 33 | U3N3.00 | [X]Other maltreatment syndromes, by official authorities    |
| 34 | U3Ny.00 | [X]Other maltreatment syndromes, by other specified persons |
| 35 | U3Nz.00 | [X]Other maltreatment syndromes, by unspecified person      |
| 36 | U3P..00 | [X]Maltreatment                                             |
| 37 | U3P0.00 | [X]Maltreatment, by spouse or partner                       |
| 38 | U3P1.00 | [X]Maltreatment, by parent                                  |
| 39 | U3P2.00 | [X]Maltreatment, by acquaintance or friend                  |
| 40 | Z352.11 | Child abuse investigation                                   |
| 41 | Z787.00 | Self-neglect                                                |
| 42 | Z787200 | Neglect of clothes                                          |
| 43 | Z787400 | Neglect of personal hygiene                                 |
| 44 | Z787500 | Neglect of physical health                                  |
| 45 | Z787600 | Neglect of dental care                                      |

|         |                                                    |
|---------|----------------------------------------------------|
| Z787700 | Neglect of physical illness                        |
| Z787800 | Neglect of common dangers                          |
| ZV1B400 | [V]Personal history of neglect                     |
| ZV4H300 | [V]Emotional neglect of child                      |
| ZV4H400 | [V]Other problems related to neglect in upbringing |
| ZV61200 | [V]Child abuse                                     |
| ZV61211 | [V]Child battering                                 |
| ZV61212 | [V]Child neglect                                   |
| ZV61213 | [V]Parent - child conflict                         |
| ZVu4B00 | [X]Other problems related to neglect in upbringing |

### Domestic abuse- Incident only codes

| Code    | Description                 |
|---------|-----------------------------|
| 14X8.00 | Victim of domestic violence |
| 14XG.00 | Victim of domestic abuse    |

### Domestic abuse- Prevalent codes

| Code    | Description                                  |
|---------|----------------------------------------------|
| 14X3.00 | History of domestic violence                 |
| 14X8.00 | Victim of domestic violence                  |
| 14XD.00 | History of domestic abuse                    |
| 14XD000 | H/O domestic emotional abuse                 |
| 14XD100 | H/O domestic physical abuse                  |
| 14XD200 | H/O domestic sexual abuse                    |
| 14XE.00 | History of being victim of domestic violence |
| 14XG.00 | Victim of domestic abuse                     |

Supplementary table 1: Annual incidence rate of domestic abuse in men between 2005-2017

| Year | New cases (Numerator) | Person years at risk (Denominator) | Incidence rate per 100,000 | Lower confidence interval | Upper confidence interval |
|------|-----------------------|------------------------------------|----------------------------|---------------------------|---------------------------|
| 2005 | 0                     | 1636719                            | 0.00                       | 0.00                      | 0.00                      |
| 2006 | 9                     | 1734689                            | 0.52                       | 0.18                      | 0.86                      |
| 2007 | 13                    | 1806891                            | 0.72                       | 0.33                      | 1.11                      |
| 2008 | 17                    | 1906963                            | 0.89                       | 0.47                      | 1.32                      |
| 2009 | 38                    | 1994312                            | 1.91                       | 1.30                      | 2.51                      |
| 2010 | 16                    | 1983802                            | 0.81                       | 0.41                      | 1.20                      |
| 2011 | 27                    | 1998716                            | 1.35                       | 0.84                      | 1.86                      |
| 2012 | 26                    | 2059505                            | 1.26                       | 0.78                      | 1.75                      |
| 2013 | 30                    | 2009399                            | 1.49                       | 0.96                      | 2.03                      |
| 2014 | 53                    | 1891262                            | 2.80                       | 2.05                      | 3.56                      |
| 2015 | 29                    | 1671621                            | 1.73                       | 1.10                      | 2.37                      |
| 2016 | 38                    | 1433446                            | 2.65                       | 1.81                      | 3.49                      |
| 2017 | 26                    | 1272745                            | 2.04                       | 1.26                      | 2.83                      |

Supplementary table 2: Prevalence of domestic abuse in men between 2005-2017

| Year | Cases (numerator) | Denominator (total population) | Prevalence per 100,000 | Lower confidence interval | Upper confidence interval |
|------|-------------------|--------------------------------|------------------------|---------------------------|---------------------------|
| 2005 | 27                | 1560540                        | 1.73                   | 1.08                      | 2.38                      |
| 2006 | 30                | 1715061                        | 1.75                   | 1.12                      | 2.38                      |
| 2007 | 48                | 1791798                        | 2.68                   | 1.92                      | 3.44                      |
| 2008 | 80                | 1861532                        | 4.30                   | 3.36                      | 5.24                      |
| 2009 | 123               | 1986921                        | 6.19                   | 5.10                      | 7.28                      |
| 2010 | 207               | 2009811                        | 10.30                  | 8.90                      | 11.70                     |
| 2011 | 251               | 1998732                        | 12.56                  | 11.00                     | 14.11                     |
| 2012 | 327               | 2030437                        | 16.10                  | 14.36                     | 17.85                     |
| 2013 | 431               | 2071595                        | 20.81                  | 18.84                     | 22.77                     |
| 2014 | 499               | 1948992                        | 25.60                  | 23.36                     | 27.85                     |
| 2015 | 565               | 1816180                        | 31.11                  | 28.54                     | 33.67                     |
| 2016 | 425               | 1518731                        | 27.98                  | 25.32                     | 30.64                     |
| 2017 | 444               | 1365746                        | 32.51                  | 29.49                     | 35.53                     |

Supplementary table 3: Annual incidence rate of childhood maltreatment between 1996-2017

| Year | New cases (Numerator) | Person years at risk (Denominator) | Incidence rate per 100,000 | Lower confidence interval | Upper confidence interval |
|------|-----------------------|------------------------------------|----------------------------|---------------------------|---------------------------|
| 1996 | 3                     | 8818.982                           | 34.02                      | -4.47                     | 72.51                     |
| 1997 | 17                    | 75578.7                            | 22.49                      | 11.80                     | 33.18                     |
| 1998 | 35                    | 166631.5                           | 21.00                      | 14.05                     | 27.96                     |
| 1999 | 47                    | 235954.6                           | 19.92                      | 14.23                     | 25.61                     |
| 2000 | 67                    | 308085.1                           | 21.75                      | 16.54                     | 26.95                     |
| 2001 | 76                    | 450754.2                           | 16.86                      | 13.07                     | 20.65                     |
| 2002 | 90                    | 575967.3                           | 15.63                      | 12.40                     | 18.85                     |
| 2003 | 94                    | 695178.8                           | 13.52                      | 10.79                     | 16.25                     |
| 2004 | 142                   | 747512.6                           | 19.00                      | 15.87                     | 22.12                     |
| 2005 | 99                    | 825747.7                           | 11.99                      | 9.63                      | 14.35                     |
| 2006 | 140                   | 876234.6                           | 15.98                      | 13.33                     | 18.62                     |
| 2007 | 106                   | 914492.9                           | 11.59                      | 9.38                      | 13.80                     |
| 2008 | 142                   | 966390.4                           | 14.69                      | 12.28                     | 17.11                     |
| 2009 | 175                   | 1014605                            | 17.25                      | 14.69                     | 19.80                     |
| 2010 | 192                   | 1013900                            | 18.94                      | 16.26                     | 21.61                     |
| 2011 | 237                   | 1032857                            | 22.95                      | 20.03                     | 25.87                     |
| 2012 | 322                   | 1071219                            | 30.06                      | 26.78                     | 33.34                     |
| 2013 | 551                   | 1053495                            | 52.30                      | 47.94                     | 56.67                     |
| 2014 | 560                   | 992752.1                           | 56.41                      | 51.74                     | 61.08                     |
| 2015 | 503                   | 880922.4                           | 57.10                      | 52.11                     | 62.09                     |
| 2016 | 463                   | 757597.2                           | 61.11                      | 55.55                     | 66.68                     |
| 2017 | 403                   | 670155.5                           | 60.14                      | 54.27                     | 66.01                     |

Supplementary table 4: Incidence rate of childhood maltreatment in females between 1996-2017

| <b>Female</b> |                          |                                          |                                  |                                 |                                 |
|---------------|--------------------------|------------------------------------------|----------------------------------|---------------------------------|---------------------------------|
| Year          | New cases<br>(Numerator) | Person years at<br>risk<br>(Denominator) | Incidence<br>rate per<br>100,000 | Lower<br>confidence<br>interval | Upper<br>confidence<br>interval |
| 1996          | 2                        | 4110.859                                 | 48.65                            | -18.76                          | 116.07                          |
| 1997          | 14                       | 34754.82                                 | 40.28                            | 19.18                           | 61.38                           |
| 1998          | 19                       | 77101.73                                 | 24.64                            | 13.56                           | 35.72                           |
| 1999          | 29                       | 109675.7                                 | 26.44                            | 16.82                           | 36.06                           |
| 2000          | 41                       | 143745.1                                 | 28.52                            | 19.79                           | 37.25                           |
| 2001          | 47                       | 210921.2                                 | 22.28                            | 15.91                           | 28.65                           |
| 2002          | 62                       | 271017.4                                 | 22.88                            | 17.18                           | 28.57                           |
| 2003          | 53                       | 328723.9                                 | 16.12                            | 11.78                           | 20.46                           |
| 2004          | 78                       | 354401.6                                 | 22.01                            | 17.13                           | 26.89                           |
| 2005          | 62                       | 392607.8                                 | 15.79                            | 11.86                           | 19.72                           |
| 2006          | 88                       | 417941.8                                 | 21.06                            | 16.66                           | 25.45                           |
| 2007          | 67                       | 437464.5                                 | 15.32                            | 11.65                           | 18.98                           |
| 2008          | 78                       | 463663.1                                 | 16.82                            | 13.09                           | 20.56                           |
| 2009          | 113                      | 488113.5                                 | 23.15                            | 18.88                           | 27.42                           |
| 2010          | 112                      | 489196.9                                 | 22.89                            | 18.66                           | 27.13                           |
| 2011          | 123                      | 499857.8                                 | 24.61                            | 20.26                           | 28.95                           |
| 2012          | 171                      | 519861.3                                 | 32.89                            | 27.96                           | 37.82                           |
| 2013          | 301                      | 511966                                   | 58.79                            | 52.15                           | 65.43                           |
| 2014          | 315                      | 483076.8                                 | 65.21                            | 58.01                           | 72.41                           |
| 2015          | 250                      | 429453.4                                 | 58.21                            | 51.00                           | 65.43                           |
| 2016          | 239                      | 369898                                   | 64.61                            | 56.42                           | 72.80                           |
| 2017          | 217                      | 327614.6                                 | 66.24                            | 57.42                           | 75.05                           |

Supplementary table 5: Incidence rate of childhood maltreatment in males between 1996-2017

| <b>Male</b> |                       |                                    |                            |                           |                           |
|-------------|-----------------------|------------------------------------|----------------------------|---------------------------|---------------------------|
| Year        | New cases (Numerator) | Person years at risk (Denominator) | Incidence rate per 100,000 | Lower confidence interval | Upper confidence interval |
| 1996        | 1                     | 4708.124                           | 21.24                      | -20.38                    | 62.86                     |
| 1997        | 3                     | 40823.88                           | 7.35                       | -0.97                     | 15.66                     |
| 1998        | 16                    | 89529.8                            | 17.87                      | 9.12                      | 26.63                     |
| 1999        | 18                    | 126278.8                           | 14.25                      | 7.67                      | 20.84                     |
| 2000        | 26                    | 164340                             | 15.82                      | 9.74                      | 21.90                     |
| 2001        | 29                    | 239833                             | 12.09                      | 7.69                      | 16.49                     |
| 2002        | 28                    | 304949.9                           | 9.18                       | 5.78                      | 12.58                     |
| 2003        | 41                    | 366454.9                           | 11.19                      | 7.76                      | 14.61                     |
| 2004        | 64                    | 393111                             | 16.28                      | 12.29                     | 20.27                     |
| 2005        | 37                    | 433139.9                           | 8.54                       | 5.79                      | 11.29                     |
| 2006        | 52                    | 458292.7                           | 11.35                      | 8.26                      | 14.43                     |
| 2007        | 39                    | 477028.4                           | 8.18                       | 5.61                      | 10.74                     |
| 2008        | 64                    | 502727.3                           | 12.73                      | 9.61                      | 15.85                     |
| 2009        | 62                    | 526491.6                           | 11.78                      | 8.85                      | 14.71                     |
| 2010        | 80                    | 524703.3                           | 15.25                      | 11.91                     | 18.59                     |
| 2011        | 114                   | 532999.4                           | 21.39                      | 17.46                     | 25.31                     |
| 2012        | 151                   | 551357.7                           | 27.39                      | 23.02                     | 31.75                     |
| 2013        | 250                   | 541528.6                           | 46.17                      | 40.44                     | 51.89                     |
| 2014        | 245                   | 509675.2                           | 48.07                      | 42.05                     | 54.09                     |
| 2015        | 253                   | 451469                             | 56.04                      | 49.14                     | 62.94                     |
| 2016        | 224                   | 387699.2                           | 57.78                      | 50.21                     | 65.34                     |
| 2017        | 186                   | 342540.9                           | 54.30                      | 46.50                     | 62.10                     |



Supplementary table 6: Incidence rate of childhood maltreatment per age group

| Age group   | New cases (Numerator) | Person years at risk (Denominator) | Incidence rate per 100,000 | Lower confidence interval | Upper confidence interval |
|-------------|-----------------------|------------------------------------|----------------------------|---------------------------|---------------------------|
| 0-1 years   | 423                   | 802550                             | 52.71                      | 47.92                     | 57.98                     |
| 1-4 years   | 1244                  | 3584000                            | 34.71                      | 32.83                     | 36.69                     |
| 5-9 years   | 1185                  | 4373600                            | 27.09                      | 25.60                     | 28.68                     |
| 10-15 years | 1289                  | 5026870                            | 25.64                      | 24.28                     | 27.08                     |
| 16-17 years | 342                   | 1616180                            | 21.16                      | 19.03                     | 23.53                     |

For peer review only

Supplementary table 7: Incidence rate of childhood maltreatment per deprivation quintile

| Townsend deprivation quintile | New cases (Numerator) | Person years at risk (Denominator) | Incidence rate per 100,000 | Lower confidence interval | Upper confidence interval |
|-------------------------------|-----------------------|------------------------------------|----------------------------|---------------------------|---------------------------|
| 1                             | 370                   | 3977881                            | 9.30                       | 8.35                      | 10.25                     |
| 2                             | 403                   | 3367785                            | 11.97                      | 10.80                     | 13.13                     |
| 3                             | 711                   | 3556979                            | 19.99                      | 18.52                     | 21.46                     |
| 4                             | 1057                  | 3295050                            | 32.08                      | 30.14                     | 34.01                     |
| 5                             | 1241                  | 2541212                            | 48.83                      | 46.12                     | 51.55                     |

For peer review only

Supplementary table 8: Incidence rate of childhood maltreatment per ethnic group

| Ethnicity   | New cases (Numerator) | Person years at risk (Denominator) | Incidence rate per 100,000 | Lower confidence interval | Upper confidence interval |
|-------------|-----------------------|------------------------------------|----------------------------|---------------------------|---------------------------|
| White       | 1802                  | 6497060                            | 27.74                      | 26.46                     | 29.02                     |
| Mixed       | 26                    | 119173.4                           | 21.82                      | 13.43                     | 30.20                     |
| Other       | 76                    | 158165.8                           | 48.05                      | 37.25                     | 58.85                     |
| Black       | 130                   | 288266.2                           | 45.10                      | 37.35                     | 52.85                     |
| South Asian | 143                   | 411692.6                           | 34.73                      | 29.04                     | 40.43                     |

## Supplementary table 9: Prevalence of childhood maltreatment: 1996-2017

| Year | Cases (numerator) | Denominator (total population) | Prevalence per 100,000 | Lower confidence interval | Upper confidence interval |
|------|-------------------|--------------------------------|------------------------|---------------------------|---------------------------|
| 1996 | 4                 | 1650                           | 242.42                 | 5.18                      | 479.67                    |
| 1997 | 63                | 35734                          | 176.30                 | 132.81                    | 219.79                    |
| 1998 | 300               | 137636                         | 217.97                 | 193.33                    | 242.60                    |
| 1999 | 469               | 215811                         | 217.32                 | 197.68                    | 236.96                    |
| 2000 | 612               | 274138                         | 223.25                 | 205.58                    | 240.91                    |
| 2001 | 901               | 420664                         | 214.19                 | 200.22                    | 228.15                    |
| 2002 | 1052              | 516432                         | 203.71                 | 191.41                    | 216.00                    |
| 2003 | 1290              | 653780                         | 197.31                 | 186.56                    | 208.07                    |
| 2004 | 1378              | 725049                         | 190.06                 | 180.03                    | 200.08                    |
| 2005 | 1582              | 785056                         | 201.51                 | 191.60                    | 211.43                    |
| 2006 | 1742              | 866447                         | 201.05                 | 191.62                    | 210.48                    |
| 2007 | 1741              | 905158                         | 192.34                 | 183.32                    | 201.37                    |
| 2008 | 1828              | 941016                         | 194.26                 | 185.36                    | 203.15                    |
| 2009 | 2015              | 1007729                        | 199.95                 | 191.23                    | 208.67                    |
| 2010 | 2152              | 1024011                        | 210.15                 | 201.29                    | 219.02                    |
| 2011 | 2231              | 1026713                        | 217.30                 | 208.29                    | 226.30                    |
| 2012 | 2544              | 1053725                        | 241.43                 | 232.06                    | 250.80                    |
| 2013 | 2914              | 1081001                        | 269.57                 | 259.79                    | 279.34                    |
| 2014 | 3253              | 1021024                        | 318.60                 | 307.67                    | 329.53                    |
| 2015 | 3487              | 957937                         | 364.01                 | 351.95                    | 376.07                    |
| 2016 | 3076              | 800060                         | 384.47                 | 370.91                    | 398.03                    |
| 2017 | 3009              | 723126                         | 416.11                 | 401.28                    | 430.94                    |

Supplementary table 10: Regression model describing the risk of experiencing childhood maltreatment

| Incidence of childhood maltreatment |                                         |         |
|-------------------------------------|-----------------------------------------|---------|
|                                     | Adjusted* incidence rate ratio (95% CI) | P value |
| <b>Sex</b>                          |                                         |         |
| Male                                | 1 (ref)                                 |         |
| Female                              | 1.35 (1.28-1.44)                        | <0.001  |
| <b>Age at cohort entry</b>          |                                         |         |
| 0-1 years                           | 1 (ref)                                 |         |
| 1-4 years                           | 0.96 (0.89-1.03)                        | 0.264   |
| 5-9 years                           | 0.67 (0.61-0.72)                        | <0.001  |
| 10-15 years                         | 0.47 (0.43-0.51)                        | <0.001  |
| 16-17 years                         | 0.23 (0.19-0.28)                        | <0.001  |
| <b>Ethnicity</b>                    |                                         |         |
| White                               | 1 (ref)                                 |         |
| Mixed race                          | 0.72 (0.49-1.07)                        | 0.102   |
| Black                               | 1.25 (1.04-1.49)                        | 0.015   |
| South Asian                         | 1.06 (0.89-1.26)                        | 0.512   |
| Others                              | 1.45 (1.15-1.82)                        | 0.002   |
| Missing                             | 0.78 (0.73-0.83)                        | <0.001  |
| <b>Townsend Deprivation Index</b>   |                                         |         |
| 1 (Least deprived)                  | 1 (ref)                                 |         |
| 2                                   | 1.29 (1.12-1.48)                        | <0.001  |
| 3                                   | 2.13 (1.88-2.42)                        | <0.001  |
| 4                                   | 3.41 (3.02-3.84)                        | <0.001  |
| 5 (Most deprived)                   | 5.14 (4.57-5.77)                        | <0.001  |
| Missing                             | 2.67 (2.35-3.03)                        | <0.001  |

\*Adjusted for other demographic factors within the table

Supplementary table 11: Annual incidence rate of domestic abuse between 1996-2017

| Year | New cases (Numerator) | Person years at risk (Denominator) | Incidence rate per 100,000 | Lower confidence interval | Upper confidence interval |
|------|-----------------------|------------------------------------|----------------------------|---------------------------|---------------------------|
| 1996 | 0                     | 19347.05                           | -                          | -                         | -                         |
| 1997 | 0                     | 166965.5                           | -                          | -                         | -                         |
| 1998 | 0                     | 370905.7                           | -                          | -                         | -                         |
| 1999 | 1                     | 522522.3                           | 0.19                       | -0.18                     | 0.57                      |
| 2000 | 0                     | 669896.3                           | -                          | -                         | -                         |
| 2001 | 1                     | 963631.1                           | 0.10                       | -0.10                     | 0.31                      |
| 2002 | 0                     | 1216535                            | -                          | -                         | -                         |
| 2003 | 0                     | 1447347                            | -                          | -                         | -                         |
| 2004 | 3                     | 1543475                            | 0.19                       | -0.03                     | 0.41                      |
| 2005 | 5                     | 1690775                            | 0.30                       | 0.04                      | 0.55                      |
| 2006 | 220                   | 1788113                            | 12.30                      | 10.68                     | 13.93                     |
| 2007 | 328                   | 1860393                            | 17.63                      | 15.72                     | 19.54                     |
| 2008 | 347                   | 1964404                            | 17.66                      | 15.81                     | 19.52                     |
| 2009 | 477                   | 2054123                            | 23.22                      | 21.14                     | 25.31                     |
| 2010 | 455                   | 2043540                            | 22.27                      | 20.22                     | 24.31                     |
| 2011 | 441                   | 2066927                            | 21.34                      | 19.35                     | 23.33                     |
| 2012 | 461                   | 2131583                            | 21.63                      | 19.65                     | 23.60                     |
| 2013 | 558                   | 2082465                            | 26.80                      | 24.57                     | 29.02                     |
| 2014 | 702                   | 1960191                            | 35.81                      | 33.16                     | 38.46                     |
| 2015 | 444                   | 1731272                            | 25.65                      | 23.26                     | 28.03                     |
| 2016 | 467                   | 1482673                            | 31.50                      | 28.64                     | 34.35                     |
| 2017 | 453                   | 1311287                            | 34.55                      | 31.37                     | 37.73                     |

Supplementary table 12: Incidence rate of domestic abuse per age group

| Age Group | New cases (Numerator) | Person years at risk (Denominator) | Incidence rate per 100,000 | Lower confidence interval | Upper confidence interval |
|-----------|-----------------------|------------------------------------|----------------------------|---------------------------|---------------------------|
| 18-25     | 1185                  | 3592040                            | 32.99                      | 31.16                     | 34.92                     |
| 25-35     | 1780                  | 5277210                            | 33.73                      | 32.20                     | 35.33                     |
| 35-45     | 1406                  | 5668310                            | 24.80                      | 23.54                     | 26.14                     |
| 45-55     | 627                   | 5317300                            | 11.79                      | 10.90                     | 12.75                     |
| 55-65     | 233                   | 4524270                            | 5.15                       | 4.53                      | 5.86                      |
| 65+       | 145                   | 6847960                            | 2.12                       | 1.80                      | 2.49                      |

## Supplementary table 13: Incidence rate of domestic abuse per deprivation quintile

| Townsend deprivation quintile | New cases (Numerator) | Person years at risk (Denominator) | Incidence rate per 100,000 | Lower confidence interval | Upper confidence interval |
|-------------------------------|-----------------------|------------------------------------|----------------------------|---------------------------|---------------------------|
| 1                             | 600                   | 6770554                            | 8.86                       | 8.15                      | 9.57                      |
| 2                             | 645                   | 5941074                            | 10.86                      | 10.02                     | 11.69                     |
| 3                             | 912                   | 5803875                            | 15.71                      | 14.69                     | 16.73                     |
| 4                             | 1162                  | 5046996                            | 23.02                      | 21.70                     | 24.35                     |
| 5                             | 1269                  | 3496615                            | 36.29                      | 34.30                     | 38.29                     |



Supplementary table 14: Incidence rate of domestic abuse per ethnic group

| Ethnic group | New cases (Numerator) | Person years at risk (Denominator) | Incidence rate per 100,000 | Lower confidence interval | Upper confidence interval |
|--------------|-----------------------|------------------------------------|----------------------------|---------------------------|---------------------------|
| White        | 2771                  | 12900000                           | 21.46                      | 20.66                     | 22.26                     |
| Mixed        | 94                    | 255581.1                           | 36.78                      | 29.35                     | 44.21                     |
| Other        | 80                    | 108769.6                           | 73.55                      | 57.44                     | 89.66                     |
| Black        | 204                   | 370777.9                           | 55.02                      | 47.47                     | 62.57                     |
| South Asian  | 356                   | 544591.4                           | 65.37                      | 58.58                     | 72.16                     |

1  
2  
3  
4  
5  
6  
7  
8  
9  
10  
11  
12  
13  
14  
15  
16  
17  
18  
19  
20  
21  
22  
23  
24  
25  
26  
27  
28  
29  
30  
31  
32  
33  
34  
35  
36  
37  
38  
39  
40  
41  
42  
43  
44  
45  
46  
47  
48  
49  
50  
51  
52  
53  
54  
55  
56  
57  
58  
59  
60

## Supplementary table 15: Prevalence of domestic abuse between 1996-2017

| Year | Cases (numerator) | Denominator (total population) | Prevalence per 100,000 | Lower confidence interval | Upper confidence interval |
|------|-------------------|--------------------------------|------------------------|---------------------------|---------------------------|
| 1996 | 0                 | 3791                           | -                      | -                         | -                         |
| 1997 | 6                 | 79878                          | 7.51                   | 1.50                      | 13.52                     |
| 1998 | 10                | 299182                         | 3.34                   | 1.27                      | 5.41                      |
| 1999 | 24                | 479834                         | 5.00                   | 3.00                      | 7.00                      |
| 2000 | 32                | 599694                         | 5.34                   | 3.49                      | 7.18                      |
| 2001 | 55                | 900147                         | 6.11                   | 4.50                      | 7.72                      |
| 2002 | 79                | 1098533                        | 7.19                   | 5.61                      | 8.78                      |
| 2003 | 115               | 1369800                        | 8.40                   | 6.86                      | 9.93                      |
| 2004 | 148               | 1502468                        | 9.85                   | 8.26                      | 11.44                     |
| 2005 | 258               | 1614733                        | 15.98                  | 14.03                     | 17.93                     |
| 2006 | 441               | 1770849                        | 24.90                  | 22.58                     | 27.23                     |
| 2007 | 964               | 1846500                        | 52.21                  | 48.91                     | 55.50                     |
| 2008 | 1520              | 1916648                        | 79.31                  | 75.32                     | 83.29                     |
| 2009 | 2199              | 2049874                        | 107.27                 | 102.79                    | 111.76                    |
| 2010 | 2993              | 2072657                        | 144.40                 | 139.24                    | 149.57                    |
| 2011 | 3729              | 2066914                        | 180.41                 | 174.63                    | 186.20                    |
| 2012 | 4534              | 2107103                        | 215.18                 | 208.92                    | 221.43                    |
| 2013 | 5340              | 2148786                        | 248.51                 | 241.86                    | 255.17                    |
| 2014 | 5790              | 2026564                        | 285.71                 | 278.36                    | 293.05                    |
| 2015 | 6111              | 1889368                        | 323.44                 | 315.35                    | 331.54                    |
| 2016 | 5199              | 1577517                        | 329.57                 | 320.63                    | 338.51                    |
| 2017 | 5217              | 1414986                        | 368.70                 | 358.71                    | 378.68                    |

Supplementary table 16: Regression model describing the risk of experiencing domestic abuse in women

| Incidence of domestic abuse in women |                                         |         |
|--------------------------------------|-----------------------------------------|---------|
|                                      | Adjusted* incidence rate ratio (95% CI) | P value |
| Age categories                       |                                         |         |
| 18-24 years                          | 1 (ref)                                 |         |
| 25-34 years                          | 0.84 (0.79-0.90)                        | <0.001  |
| 35-44 years                          | 0.57 (0.52-0.61)                        | <0.001  |
| 45-54 years                          | 0.26 (0.23-0.29)                        | <0.001  |
| 55-64 years                          | 0.12 (0.10-0.14)                        | <0.001  |
| 65+ years                            | 0.05 (0.04-0.06)                        | <0.001  |
| Ethnicity                            |                                         |         |
| White                                | 1 (ref)                                 |         |
| Mixed race                           | 1.16 (0.95-1.43)                        | 0.152   |
| Black                                | 1.64 (1.42-1.89)                        | <0.001  |
| South Asian                          | 2.14 (1.92-2.39)                        | <0.001  |
| Others                               | 2.19 (1.75-2.73)                        | <0.001  |
| Missing                              | 0.53 (0.50-0.56)                        | <0.001  |
| Townsend Deprivation Index           |                                         |         |
| 1 (Least deprived)                   | 1 (ref)                                 | 0.001   |
| 2                                    | 1.20 (1.08-1.35)                        | <0.001  |
| 3                                    | 1.55 (1.40-1.72)                        | <0.001  |
| 4                                    | 2.08 (1.88-2.30)                        | <0.001  |
| 5 (Most deprived)                    | 2.30 (2.71-3.30)                        | <0.001  |
| Missing                              | 1.65 (1.48-1.84)                        | <0.001  |

\*Adjusted for other demographic factors within the table

## STROBE Statement—checklist of items that should be included in reports of observational studies

|                           | Item No | Recommendation                                                                                                                                                                             | Reporting location     |
|---------------------------|---------|--------------------------------------------------------------------------------------------------------------------------------------------------------------------------------------------|------------------------|
| <b>Title and abstract</b> | 1       | (a) Indicate the study's design with a commonly used term in the title or the abstract                                                                                                     | Title and abstract     |
|                           |         | (b) Provide in the abstract an informative and balanced summary of what was done and what was found                                                                                        | Title and abstract     |
| <b>Introduction</b>       |         |                                                                                                                                                                                            |                        |
| Background/rationale      | 2       | Explain the scientific background and rationale for the investigation being reported                                                                                                       | Introduction           |
| Objectives                | 3       | State specific objectives, including any prespecified hypotheses                                                                                                                           | Introduction           |
| <b>Methods</b>            |         |                                                                                                                                                                                            |                        |
| Study design              | 4       | Present key elements of study design early in the paper                                                                                                                                    | Methods                |
| Setting                   | 5       | Describe the setting, locations, and relevant dates, including periods of recruitment, exposure, follow-up, and data collection                                                            | Methods                |
| Participants              | 6       | (a) <i>Cohort study</i> —Give the eligibility criteria, and the sources and methods of selection of participants. Describe methods of follow-up                                            | Methods                |
|                           |         | <i>Case-control study</i> —Give the eligibility criteria, and the sources and methods of case ascertainment and control selection. Give the rationale for the choice of cases and controls |                        |
|                           |         | <i>Cross-sectional study</i> —Give the eligibility criteria, and the sources and methods of selection of participants                                                                      |                        |
|                           |         | (b) <i>Cohort study</i> —For matched studies, give matching criteria and number of exposed and unexposed                                                                                   | N/A                    |
|                           |         | <i>Case-control study</i> —For matched studies, give matching criteria and the number of controls per case                                                                                 |                        |
|                           |         |                                                                                                                                                                                            |                        |
| Variables                 | 7       | Clearly define all outcomes, exposures, predictors, potential confounders, and effect modifiers. Give diagnostic criteria, if applicable                                                   | Methods                |
| Data sources/measurement  | 8*      | For each variable of interest, give sources of data and details of methods of assessment (measurement). Describe comparability of assessment methods if there is more than one group       | Methods                |
| Bias                      | 9       | Describe any efforts to address potential sources of bias                                                                                                                                  | Methods and discussion |
| Study size                | 10      | Explain how the study size was arrived at                                                                                                                                                  | Methods                |
| Quantitative variables    | 11      | Explain how quantitative variables were handled in the analyses. If applicable, describe which groupings were chosen and why                                                               | Methods                |
| Statistical methods       | 12      | (a) Describe all statistical methods, including those used to control for confounding                                                                                                      | Methods                |
|                           |         | (b) Describe any methods used to examine subgroups and interactions                                                                                                                        | Methods                |
|                           |         | (c) Explain how missing data were addressed                                                                                                                                                | Methods                |
|                           |         | (d) <i>Cohort study</i> —If applicable, explain how loss to follow-up was addressed                                                                                                        | Methods                |
|                           |         | <i>Case-control study</i> —If applicable, explain how matching of cases                                                                                                                    |                        |

1  
2 and controls was addressed

3 *Cross-sectional study*—If applicable, describe analytical methods  
4 taking account of sampling strategy

5  
6 (e) Describe any sensitivity analyses

Methods

7 Continued on next page  
8  
9  
10  
11  
12  
13  
14  
15  
16  
17  
18  
19  
20  
21  
22  
23  
24  
25  
26  
27  
28  
29  
30  
31  
32  
33  
34  
35  
36  
37  
38  
39  
40  
41  
42  
43  
44  
45  
46  
47  
48  
49  
50  
51  
52  
53  
54  
55  
56  
57  
58  
59  
60

For peer review only

1  
2  
3  
4  
5  
6  
7  
8  
9  
10  
11  
12  
13  
14  
15  
16  
17  
18  
19  
20  
21  
22  
23  
24  
25  
26  
27  
28  
29  
30  
31  
32  
33  
34  
35  
36  
37  
38  
39  
40  
41  
42  
43  
44  
45  
46  
47  
48  
49  
50  
51  
52  
53  
54  
55  
56  
57  
58  
59  
60

| <b>Results</b>           |     |                                                                                                                                                                                                              |                   |
|--------------------------|-----|--------------------------------------------------------------------------------------------------------------------------------------------------------------------------------------------------------------|-------------------|
| Participants             | 13* | (a) Report numbers of individuals at each stage of study—eg numbers potentially eligible, examined for eligibility, confirmed eligible, included in the study, completing follow-up, and analysed            | Results           |
|                          |     | (b) Give reasons for non-participation at each stage                                                                                                                                                         | n/a               |
|                          |     | (c) Consider use of a flow diagram                                                                                                                                                                           | n/a               |
| Descriptive data         | 14* | (a) Give characteristics of study participants (eg demographic, clinical, social) and information on exposures and potential confounders                                                                     | Results           |
|                          |     | (b) Indicate number of participants with missing data for each variable of interest                                                                                                                          | Table 1           |
|                          |     | (c) <i>Cohort study</i> —Summarise follow-up time (eg, average and total amount)                                                                                                                             | Results           |
| Outcome data             | 15* | <i>Cohort study</i> —Report numbers of outcome events or summary measures over time                                                                                                                          | Results           |
|                          |     | <i>Case-control study</i> —Report numbers in each exposure category, or summary measures of exposure                                                                                                         |                   |
|                          |     | <i>Cross-sectional study</i> —Report numbers of outcome events or summary measures                                                                                                                           |                   |
| Main results             | 16  | (a) Give unadjusted estimates and, if applicable, confounder-adjusted estimates and their precision (eg, 95% confidence interval). Make clear which confounders were adjusted for and why they were included | Results           |
|                          |     | (b) Report category boundaries when continuous variables were categorized                                                                                                                                    | Results           |
|                          |     | (c) If relevant, consider translating estimates of relative risk into absolute risk for a meaningful time period                                                                                             | Results           |
| Other analyses           | 17  | Report other analyses done—eg analyses of subgroups and interactions, and sensitivity analyses                                                                                                               | Results           |
| <b>Discussion</b>        |     |                                                                                                                                                                                                              |                   |
| Key results              | 18  | Summarise key results with reference to study objectives                                                                                                                                                     | Discussion        |
| Limitations              | 19  | Discuss limitations of the study, taking into account sources of potential bias or imprecision. Discuss both direction and magnitude of any potential bias                                                   | Discussion        |
| Interpretation           | 20  | Give a cautious overall interpretation of results considering objectives, limitations, multiplicity of analyses, results from similar studies, and other relevant evidence                                   | Discussion        |
| Generalisability         | 21  | Discuss the generalisability (external validity) of the study results                                                                                                                                        | Discussion        |
| <b>Other information</b> |     |                                                                                                                                                                                                              |                   |
| Funding                  | 22  | Give the source of funding and the role of the funders for the present study and, if applicable, for the original study on which the present article is based                                                | Funding statement |

\*Give information separately for cases and controls in case-control studies and, if applicable, for exposed and unexposed groups in cohort and cross-sectional studies.

**Note:** An Explanation and Elaboration article discusses each checklist item and gives methodological background and published examples of transparent reporting. The STROBE checklist is best used in conjunction with this article (freely available on the Web sites of PLoS Medicine at <http://www.plosmedicine.org/>, Annals of Internal Medicine at <http://www.annals.org/>, and Epidemiology at <http://www.epidem.com/>). Information on the STROBE Initiative is available at [www.strobe-statement.org](http://www.strobe-statement.org).
